# Supplementary material for: Metastable Se6 as a ligand for Ag+: from isolated molecular to polymeric 1D and 2D structures
Source: Royal Society of Chemistry journal article supplement (doi:10.1039/c0dt01251c), 2011-01-01
Supplement: c0dt01251c.pdf [file c0dt01251c.pdf]

## SUPPORTING INFORMATION

### Metastable Se<sub>6</sub> as a Ligand for Ag<sup>+</sup>: from Isolated Molecular to Polymeric 1D and 2D Structures

*Damian Aris,<sup>a</sup> Johannes Beck,<sup>b</sup> Andreas Decken,<sup>a</sup> Isabelle Dionne,<sup>a</sup> Jörn Schmedt auf der Günne,<sup>\*c</sup> Wilfried Hoffbauer,<sup>b</sup> Tobias Köchner,<sup>d</sup> Ingo Krossing,<sup>\*d</sup> Jack Passmore,<sup>\*a</sup> Eric Rivard,<sup>a</sup> Folker Steden,<sup>b</sup> Xinping Wang<sup>a</sup>*

<sup>a</sup> Department of Chemistry, University of New Brunswick, Fredericton N.B., E3B 6E2,  
Canada.

<sup>b</sup> Institut für Anorganische Chemie, Friedrich Wilhelms Universität Bonn, 53121 Bonn,  
Germany.

<sup>c</sup> Department of Chemistry and Biochemistry, Ludwig Maximilians Universität, 81377  
München, Germany.

<sup>d</sup> Institut für Anorganische und Analytische Chemie, Albert-Ludwigs-Universität, 79104  
Freiburg, Germany.

E-mail: passmore@unb.ca. Fax: (506) 453-4981.

\*To whom correspondence should be addressed: Jörn Schmedt auf der Günne (<sup>109</sup>Ag/<sup>19</sup>F NMR), Ingo Krossing (theoretical calculations and isolated [(OSO)<sub>x</sub>AgSe<sub>6</sub>Ag(OSO)<sub>x</sub>]<sup>2+</sup> (x = 1, 2) preparation), and Jack Passmore (problem conception and the remainder of preparations and structures).

## Table of Contents

|                                                                                                       |    |
|-------------------------------------------------------------------------------------------------------|----|
| S1 Reactions leading to <b>3</b> and <b>4</b>                                                         | 2  |
| S2 Detailed description of the X-ray single crystal structures                                        | 12 |
| S 2.1 Crystal Structure of <b>1</b>                                                                   | 12 |
| S 2.2 Crystal Structure of <b>2a</b>                                                                  | 19 |
| S 2.3 Crystal Structure of <b>3</b>                                                                   | 24 |
| S 2.4 Crystal Structure of <b>4</b>                                                                   | 34 |
| S3 FT Raman Spectra of <b>4</b>                                                                       | 43 |
| S4 Quantum chemical calculations                                                                      | 44 |
| S 4.1 Energetics of the calculated compounds                                                          | 44 |
| S 4.2 Born-Fajans-Haber cycles for estimation of lattice enthalpies                                   | 46 |
| S 4.3 Details of the Quantum Chemical Investigations                                                  | 48 |
| S 4.3.1 Calculated Geometries and Spectra PBE0/TZVPP                                                  | 48 |
| S 4.3.2 Bond Analysis                                                                                 | 65 |
| S 4.4 Selenium, Silver and Oxygen distances and angles:<br>Calculated structures on different levels. | 85 |
| S 4.5 Se <sub>6</sub> <sup>2+</sup> conformers                                                        | 86 |
| S5.1 NMR experimental details <b>1</b>                                                                | 86 |
| S5.2 Additional Solid State NMR spectra of (AgI <sub>2</sub> ) <sub>n</sub> nSbF <sub>6</sub>         | 86 |
| S6 Syntheses of Ag[Sb(OTeF <sub>5</sub> ) <sub>6</sub> ]                                              | 88 |
| S7 Attempted syntheses of [Se <sub>x</sub> ][Sb(OTeF <sub>5</sub> ) <sub>6</sub> ](x = 6, 8)          | 90 |
| S8 Powder Spectra of the greyish remains in the synthesis of <b>2a</b>                                | 91 |
| S9 <sup>77</sup> Se-spectra of <b>2a</b>                                                              | 92 |
| S10 Powder XRD of <b>2b</b>                                                                           | 93 |

## S1 Reactions leading to **3** and **4**

Table S1.1 Reaction data (g, mmol) of some reactions

| Code     | Reaction                                                  | Mole ratio <sup>a</sup> | Time and temperature  | Emperical formula based on weight changes <sup>b</sup> | Emperical formula based on chemical analysis              | Single crystal X-ray (SCX) and X-ray powder diffraction (XRD) |
|----------|-----------------------------------------------------------|-------------------------|-----------------------|--------------------------------------------------------|-----------------------------------------------------------|---------------------------------------------------------------|
| <b>a</b> | AgAsF <sub>6</sub> + Se powder                            | 10 : 1                  | several minutes, r.t. |                                                        |                                                           | <b>3</b> (SCX)                                                |
| <b>b</b> | AgAsF <sub>6</sub> + Se pellets                           | 2 : 1                   | 2d, r.t.              | Se <sub>2.7</sub> AgAsF <sub>6</sub>                   | Se <sub>2.90</sub> AgAs <sub>1.02</sub> F <sub>5.95</sub> | <b>3</b> (XRD)                                                |
| <b>c</b> | AgAsF <sub>6</sub> + Se pellets                           | 1 : 8 <sup>c</sup>      | 24d, 5°C              | Se <sub>3.0</sub> AgAsF <sub>6</sub>                   | Se <sub>3.05</sub> AgAs <sub>1.02</sub> F <sub>6.12</sub> |                                                               |
| <b>d</b> | Se <sub>4</sub> (AsF <sub>6</sub> ) <sub>2</sub> +2Ag+2Se | 1 : 2 : 2               | 15d, r.t.             | Se <sub>3</sub> AgAsF <sub>6</sub>                     | Se <sub>2.74</sub> AgAs <sub>0.96</sub> F <sub>5.65</sub> | <b>3</b> (XRD)                                                |
| <b>e</b> | AgSbF <sub>6</sub> + Se powder                            | 20 : 1                  | several minutes, r.t. |                                                        |                                                           | <b>2</b> (SCX)                                                |
| <b>f</b> | AgSbF <sub>6</sub> + Se powder                            | 3 : 2                   | 14d, r.t.             | Se <sub>2.2</sub> AgSbF <sub>6</sub>                   |                                                           | ? (XRD)                                                       |
| <b>g</b> | AgSbF <sub>6</sub> + Se powder                            | 1 : 3                   | 2d, r.t.              | Se <sub>3.4</sub> AgSbF <sub>6</sub>                   |                                                           |                                                               |
| <b>h</b> | AgSbF <sub>6</sub> + Se pellets                           | 1 : 8.5 <sup>c</sup>    | 24d, 5 °C             | Se <sub>4.6</sub> AgSbF <sub>6</sub>                   | Se <sub>5.4</sub> AgSb <sub>1.07</sub> F <sub>6.17</sub>  | ? (XRD)                                                       |

- a) Weight given in Table S1.2;  
 b) Based on the amount of the Se and AgMF<sub>6</sub> consumed;  
 c) All AgMF<sub>6</sub> consumed in this reaction;  
 d) The insoluble product and unreacted AgSbF<sub>6</sub> were not separated.

Table S1.2

| code | Reactions                       | AgMF <sub>6</sub><br>(M=As, Sb) | Se<br>(powder or pellets) | AgMF <sub>6</sub> consumed | Se consumed   | Se : AgMF <sub>6</sub> <sup>a</sup> |
|------|---------------------------------|---------------------------------|---------------------------|----------------------------|---------------|-------------------------------------|
| b    | AgAsF <sub>6</sub> + Se powder  | 1.315, 4.431                    | 0.164, 2.077              | 0.05, 0.168                | 0.036, 0.456  | 2.7 : 1                             |
| c    | AgAsF <sub>6</sub> + Se pellets | 0.934, 3.147                    | 1.965, 24.886             | 0.934, 3.147               | 0.755, 9.562  | 3.0 : 1                             |
| f    | AgSbF <sub>6</sub> + Se powder  | 3.000, 8.730                    | 0.443, 5.610              | 0.870, 2.532               | 0.443, 5.610  | 2.2 : 1                             |
| g    | AgSbF <sub>6</sub> + Se powder  | 1.111, 3.233                    | 0.685, 8.675              | 0.871, 2.535               | 0.685, 8.675  | 3.4 : 1                             |
| h    | AgSbF <sub>6</sub> + Se pellets | 2.055, 5.980                    | 4.011, 50.798             | 2.055, 5.980               | 2.166, 27.431 | 4.6 : 1                             |

- a) The mole ratio (Se : AgMF<sub>6</sub>) is based on the amount of the consumed Se and consumed AgMF<sub>6</sub>.

Table S1.3

Comparison of Raman and IR frequencies of the insoluble products from reaction b, c, d (see Tables S1.1 and S1.2), Se<sub>6</sub> (s),<sup>a</sup> Se<sub>6</sub> in SiO<sub>2</sub> matrix,<sup>b</sup> Se powder,<sup>a</sup> Se pellets,<sup>a</sup> and AsF<sub>6</sub><sup>-</sup> (in O<sub>2</sub>AsF<sub>6</sub>)<sup>c</sup> with relative peak intensities in parentheses.<sup>d</sup>

| Se <sub>6</sub> (s)    | Se powder | Se <sub>6</sub> in SiO <sub>2</sub> matrix | Se pellets                  | b (Ra)                     | b(IR)             | c (Ra)                      | c(IR)             | d(Ra)                       | d(IR)             | AsF <sub>6</sub> <sup>-</sup> (Ra) | AsF <sub>6</sub> <sup>-</sup> (IR) | Assign. <sup>e</sup>                                                                |
|------------------------|-----------|--------------------------------------------|-----------------------------|----------------------------|-------------------|-----------------------------|-------------------|-----------------------------|-------------------|------------------------------------|------------------------------------|-------------------------------------------------------------------------------------|
|                        |           |                                            |                             | 712(1)<br>691(1)<br>673(5) | 698(10)<br>)<br>) | 712(0.5)<br>)<br>)          | 704(10)<br>)<br>) | 709(0.5)<br>)<br>)          | 703(10)<br>)<br>) |                                    | 700(10)                            | v <sub>3</sub> (AsF <sub>6</sub> <sup>-</sup> ), F <sub>u</sub>                     |
|                        |           |                                            |                             |                            | 666(8)            | 673(3)<br>639(0.2)          | 666(8)            | 672(2)                      | 667(8)            | 689(10)                            |                                    | v <sub>1</sub> (AsF <sub>6</sub> <sup>-</sup> ), A <sub>g</sub><br>?                |
|                        |           |                                            |                             | 574(0.5)<br>)<br>)         | 561(3)            |                             |                   |                             | 563(3)            | 573(5)                             |                                    | v <sub>2</sub> (AsF <sub>6</sub> <sup>-</sup> ), E <sub>g</sub>                     |
|                        |           |                                            |                             | 558(0.5)<br>)<br>)         |                   | 401(0.3)                    |                   | 491(0.5)                    |                   |                                    | 385(1)                             | ?<br>v <sub>4</sub> (AsF <sub>6</sub> <sup>-</sup> ), F <sub>u</sub>                |
|                        |           |                                            |                             | 401(0.5)<br>)<br>)         | 398(1)<br>385(2)  | 373(1)                      |                   | 372(1)                      | 397(1)<br>388(2)  | 375(1)                             |                                    | v <sub>5</sub> (AsF <sub>6</sub> <sup>-</sup> ), F <sub>g</sub>                     |
| 247(10)<br>)<br>221(1) | 236(10)   | 276(9)<br>263(2)                           | 251(9.5)<br>235(10)         | 373(3)                     |                   | 270(10)<br>256(7)<br>170(5) |                   | 270(10)<br>254(7)<br>169(5) |                   |                                    |                                    | v(SeSe), A <sub>1g</sub><br>v(SeSe), E <sub>g</sub><br>v <sub>s</sub> (SeAgSe)<br>? |
|                        | 144(0.5)  |                                            | 146(1)<br>)<br>)            | 272(10)<br>)<br>)          |                   | 156(3)                      |                   |                             |                   |                                    |                                    | δ(SeSeSe)                                                                           |
| 129(3)<br>102(2)       |           | 133(2)<br>102(10)                          | 133(1)<br>111(1)<br>99(0.5) | 256(5)<br>171(9)           |                   |                             |                   | 123(5)<br>115(4)            |                   |                                    |                                    | δ(SeSeSe),<br>A <sub>1g</sub><br>δ(SeSeSe),<br>E <sub>g</sub>                       |
|                        |           |                                            |                             | 126(6)<br>113(5)           |                   |                             |                   |                             |                   |                                    |                                    |                                                                                     |

a) Based on Raman spectra of this work, Se powder consists of trigonal Se<sub>8</sub> and Se pellets are a mixture of Se<sub>8</sub> and Se<sub>6</sub>. K. Nagata, K. Ishibashi, Y. Miyamoto, *Jpn. J. Appl. Phys.* **1981**, 20, 463; b) A micro porous pure SiO<sub>2</sub> modification consisting of pseudo-hexagonal sheets of pentagondodecahedral cages, stacked in an ABCABC sequence and interconnected by O-Si-O bridges. G. Wimsberger, H. P. Fritzer, R. Zink, A. Popitsch, B. Pillep, P. Behrens, *J. Phys. Chem. B*, **1999**, 103, 5797; c) C. Naulin, R. Bougon, *J. Chem. Phys.*, **1976**, 64, 4156; d) Peak intensities were determined by estimating the area (for Raman) and height (for IR) of peaks; and e) The AsF<sub>6</sub><sup>-</sup> assignments are based on ideal O<sub>h</sub> symmetry and for Se<sub>6</sub> on ideal D<sub>3d</sub> symmetry.

Table S1.4

Comparison of Raman frequencies of the insoluble products from reaction f, g, and h (see Table S1.1 and S1.2), together with Se<sub>6</sub>,<sup>a</sup> Se powder<sup>a</sup> and Se pellets<sup>a</sup>

| Se <sub>6</sub> | Se powder | Se pellets        | g        | f        | h                 | Assign. <sup>b</sup>                                            |
|-----------------|-----------|-------------------|----------|----------|-------------------|-----------------------------------------------------------------|
|                 |           |                   | 650(0.5) | 644(1)   |                   | v <sub>1</sub> (SbF <sub>6</sub> <sup>-</sup> ), A <sub>g</sub> |
|                 |           |                   | 518(0.1) | 513(0.2) |                   | v <sub>2</sub> (SbF <sub>6</sub> <sup>-</sup> ), E <sub>g</sub> |
|                 |           |                   |          | 298(0.8) |                   | v <sub>3</sub> (SbF <sub>6</sub> <sup>-</sup> ), F <sub>g</sub> |
| 247(10)         |           | 251(9.5)          | 272(2)   | 271(1)   | 271(5)<br>261(10) | v(SeSe), A <sub>1g</sub>                                        |
| 221(1)          | 236(10)   | 235(10)           | 253(10)  | 253(10)  | 253(8)            | v(SeSe), E <sub>g</sub>                                         |
|                 |           |                   | 161(4)   | 161(2)   |                   | v <sub>s</sub> (SeAgSe)                                         |
| 129(3)          | 144(0.5)  | 146(1)<br>133(1)  | 124(1)   |          | 147(3)<br>134(6)  | δ(SeSeSe), A <sub>1g</sub>                                      |
| 102(2)          |           | 111(1)<br>99(0.5) | 97(5)    | 97(2)    | 105(5)            | δ(SeSeSe), E <sub>g</sub>                                       |

a) Based on Raman spectra of this work, Se powder consists of trigonal Se<sub>∞</sub> and Se pellets are a mixture of Se<sub>∞</sub> and Se<sub>6</sub>. K. Nagata, T. Ishibashi, Y. Miyamoto, *Jpn. J. Appl. Phys.* **1981**, *20*, 463; b) Peak intensities were determined by estimating the area (for Raman) and height (for IR) of peaks. The AsF<sub>6</sub><sup>-</sup> assignments are based on ideal O<sub>h</sub> symmetry and for Se<sub>6</sub> on ideal D<sub>3d</sub> symmetry.

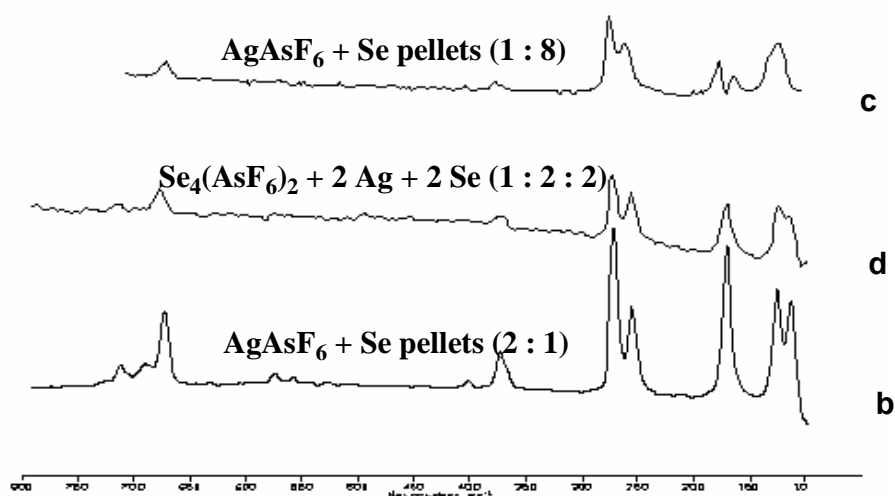

Figure S1.5 FT-Raman spectrum of the yellow insoluble product from Reaction b, c, and d. Experimental parameters: b. 1200 scans, 4 cm<sup>-1</sup>, r.t.; c and d. 1000 scans, 4 cm<sup>-1</sup>, r.t..

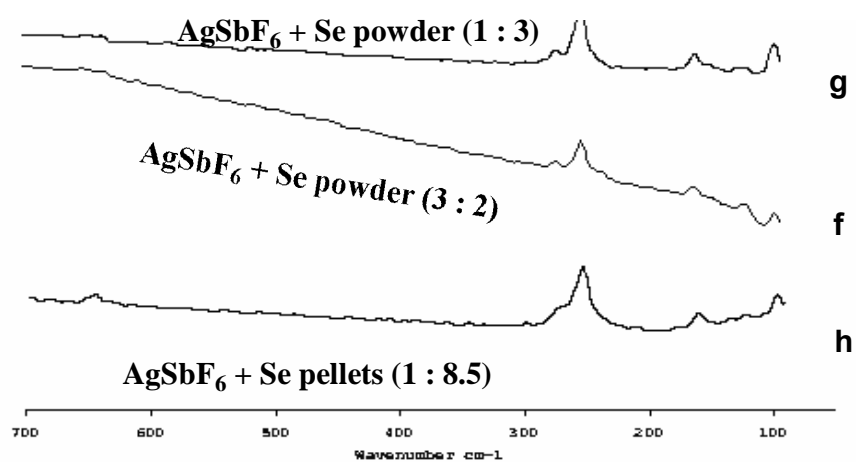

Figure S1.6 FT-Raman spectrum of the yellow insoluble product from reaction f, g and h (g. 2000 scans, 4 cm<sup>-1</sup>, r.t.; f. 5 mm NMR tube, 2000 scans, 4 cm<sup>-1</sup>, r.t.; h. 1000 scans, 4 cm<sup>-1</sup>, r.t.).



Table S 1.7:  $^{109}\text{Ag}$  and  $^{19}\text{F}$  solid NMR

| code | Reactions (mole ratio)                    | Compound                                                                         | $\delta_{\text{iso}}^{109}\text{Ag}$ (ppm) | $\delta_{\text{iso}}^{19}\text{F}$ (ppm) | $T_1$ ( $^{19}\text{F}$ , s) |
|------|-------------------------------------------|----------------------------------------------------------------------------------|--------------------------------------------|------------------------------------------|------------------------------|
|      |                                           | AgF                                                                              | -47                                        | -318.2                                   | ~200                         |
|      |                                           | AgF <sub>2</sub>                                                                 | -189                                       | -199.5                                   |                              |
|      |                                           | AgSbF <sub>6</sub>                                                               | -221                                       | -127.7                                   | ~0.3                         |
|      |                                           | AgAsF <sub>6</sub>                                                               | -243                                       | -63 ~ -71 ~ -79                          |                              |
|      |                                           | AgI <sub>2</sub> SbF <sub>6</sub>                                                | 119                                        | -97 ~ -124, sextet                       | ~3                           |
|      |                                           | AgI <sub>2</sub> AsF <sub>6</sub>                                                | 112                                        | -50 ~ -57, quartet                       | ~10                          |
| b    | AgAsF <sub>6</sub> + Se pellets (2 : 1)   | <b>3</b>                                                                         | -42, -220                                  | -52 ~ -59, quartet                       | ~2                           |
| f    | AgSbF <sub>6</sub> + Se powder (3 : 2)    | <b>2</b> ? or Se <sub>6</sub> Ag <sub>2</sub> (SbF <sub>6</sub> ) <sub>2</sub> ? | 359s, 86s, -335                            | -95 ~ -140                               | ~1                           |
| h    | AgSbF <sub>6</sub> + Se pellets (1 : 8.5) | Se <sub>6</sub> AgSbF <sub>6</sub> ?                                             | 483, 429, 113, -292s                       | -104, -114, doublet                      | ~1                           |

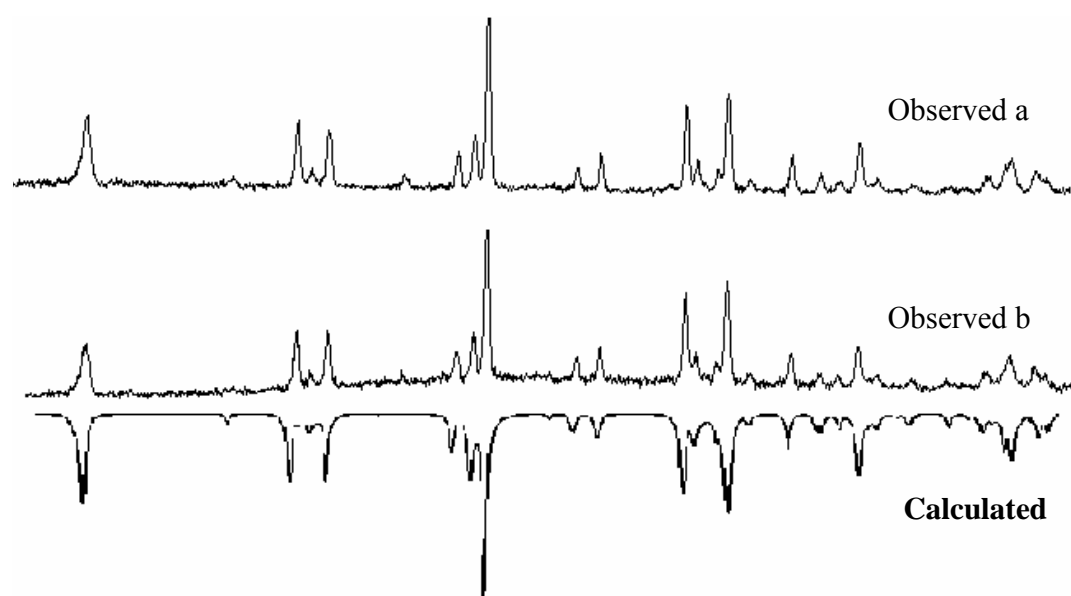

Figure S1.8: X-ray powder diffraction patterns. Observed a: XRD of the yellow insoluble product from the reaction Se pellets + AgAsF<sub>6</sub>; observed b: XRD of the yellow insoluble product from the reaction 2Se + 2Ag + Se<sub>4</sub>(AsF<sub>6</sub>)<sub>2</sub>; Calculated: XRD calculated from crystal structure of **4**



## S 2 Detailed description of the X-ray single crystal structures:

### S 2.1 Crystal structure of **1**

**1**: A single crystal X-ray structure determination showed that **1** contains discrete  $[(\text{OSO})\text{AgSe}_6\text{Ag}(\text{OSO})]^{2+}$  dications (Fig. 1a in paper) and  $[\text{Sb}(\text{OTeF}_5)_6]^-$  anions packed in a  $\text{TiO}_2$  type structure with a cubic close packed  $[\text{Sb}(\text{OTeF}_5)_6]^-$  anion and every second octahedral hole filled by  $[(\text{OSO})\text{AgSe}_6\text{Ag}(\text{OSO})]^{2+}$  in agreement with the radius ratio rule. The very large spherical  $[\text{Sb}(\text{OTeF}_5)_6]^-$  anions [outer diameter:  $10.677 + 2 r_{\text{cov.}}(\text{F}) = 12.117 \text{ \AA}$ ] form a cubic close packed lattice where the cations occupy every second octahedral hole. The anions are surrounded trigonally by three cations and the cations octahedrally by six anions (see graphic representations in Figure S2.1.1). Neglecting the coordinated  $\text{SO}_2$  molecules (which will distort the almost spherical  $\text{Ag}_2\text{Se}_6^{2+}$  cation to an ellipsoid) a cation diameter of  $7.328 \text{ \AA}$  is found [outer diameter  $5.048 + 2 r_{\text{ion.}}(\text{Ag}) = 7.328 \text{ \AA}$ ] giving a ratio  $r_{\text{cat.}}/r_{\text{anion}}$  of 0.605. This is in agreement with a Rutile Ti structure which requires a ratio  $r_{\text{cat.}}/r_{\text{anion}}$  between 0.414 and 0.737. This supports the thesis that the large anions and cations of this kind are highly ionic .

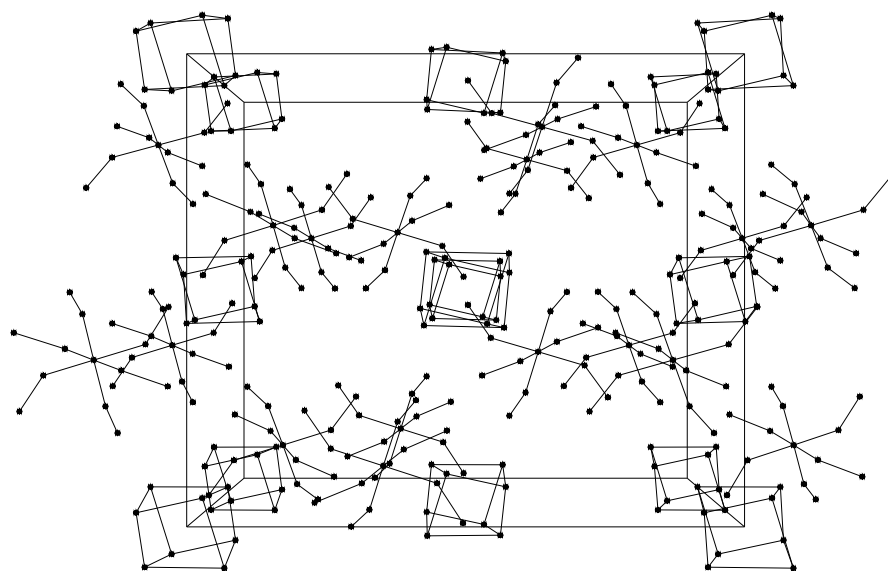

Figure S2.1.1: Representation of the unit cell in **1**. The cations form a cubic face centred packing. All fluorine atoms and the  $\text{SO}_2$  molecules are omitted for clarity.

The  $[(\text{OSO})\text{AgSe}_6\text{Ag}(\text{OSO})]^{2+}$  dication contains a  $D_{3d}$  symmetric,  $[\text{Ag}_2\text{Se}_6]^{2+}$  heterocubane and two disordered  $\text{SO}_2$  molecules which each coordinate to one silver atom. The structure is derived from a six-

membered  $\text{Se}_6$  ring in the chair conformation with a very similar geometry to that of  $\text{Se}_6$  (Table 1, Figure 1 in main text). The selenium atoms in  $\text{Se}_6$  coordinate alternatively to one of the two silver atoms above or below the ring plane (Ag-Se 2.885(2) Å). The geometry of  $[(\text{OSO})\text{AgSe}_6\text{Ag}(\text{OSO})]^{2+}$  is similar to that of  $[\text{Nb}_2\text{Sn}_6(\text{C}_6\text{H}_5\text{Me}_2)_2]^{2-}$  (S2.1.2).<sup>1</sup>

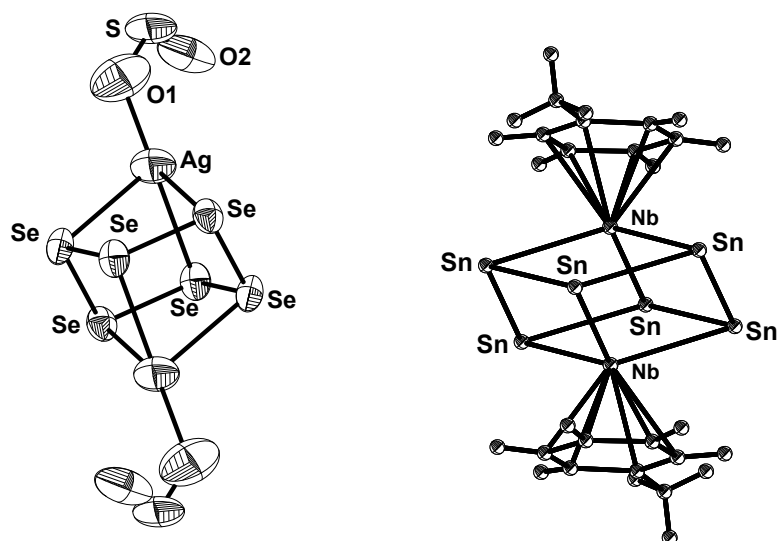

Figure S2.1.2: Comparison of  $[(\text{OSO})\text{AgSe}_6\text{Ag}(\text{OSO})]^{2+}$  and  $[\text{Nb}_2\text{Sn}_6(\text{C}_6\text{H}_5\text{Me}_2)_2]^{2-}$  geometries. Thermal ellipsoids are drawn at the 50 % probability level.

There are also similarities between the solid state structures of the  $\text{Se}_6\text{I}_2^{2+}$  dication and the  $[\text{Ag}_2\text{Se}_6]^{2+}$  framework in the  $[(\text{OSO})\text{AgSe}_6\text{Ag}(\text{OSO})]^{2+}$  dication (Fig. S2.1.3). One localised, strong Se-I bond and two weaker Se--I contacts in  $\text{Se}_6\text{I}_2^{2+}$  are exchanged for three equal Se-Ag bonds in  $[\text{Ag}_2\text{Se}_6]^{2+}$ .

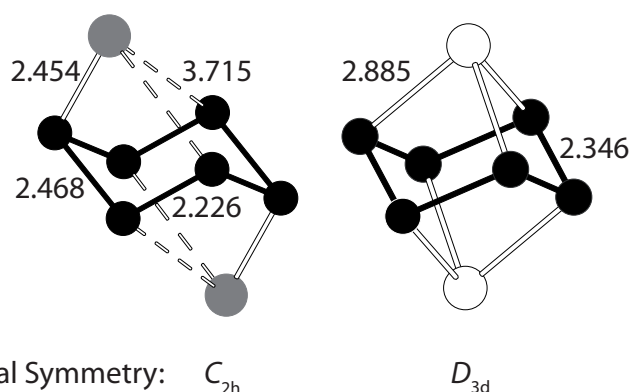

Figure S2.1.3: Comparison of the  $\text{Se}_6\text{I}_2^{2+}$  and “ $\text{Se}_6\text{Ag}_2^{2+}$ ” geometries in the solid state.

Each selenium atom has three contacts to fluorine atoms at 3.170(7), 3.384(7), and 3.435(7) Å, which are below or near the sum of their Van der Waals radii (3.40 Å) (Fig. S2.1.4). All other contacts are

greater than 3.680 Å. These Se--F contacts are longer than those found in the salts  $\text{Se}_4(\text{Sb}_4\text{F}_{17})(\text{SbF}_6)$  (2.69 to 3.37 Å)<sup>2</sup> and  $\text{Se}_3\text{X}_3(\text{AsF}_6)^{3,4}$  (X = Cl 2.688 to 3.414 Å, Br 2.79 to 3.22 Å).

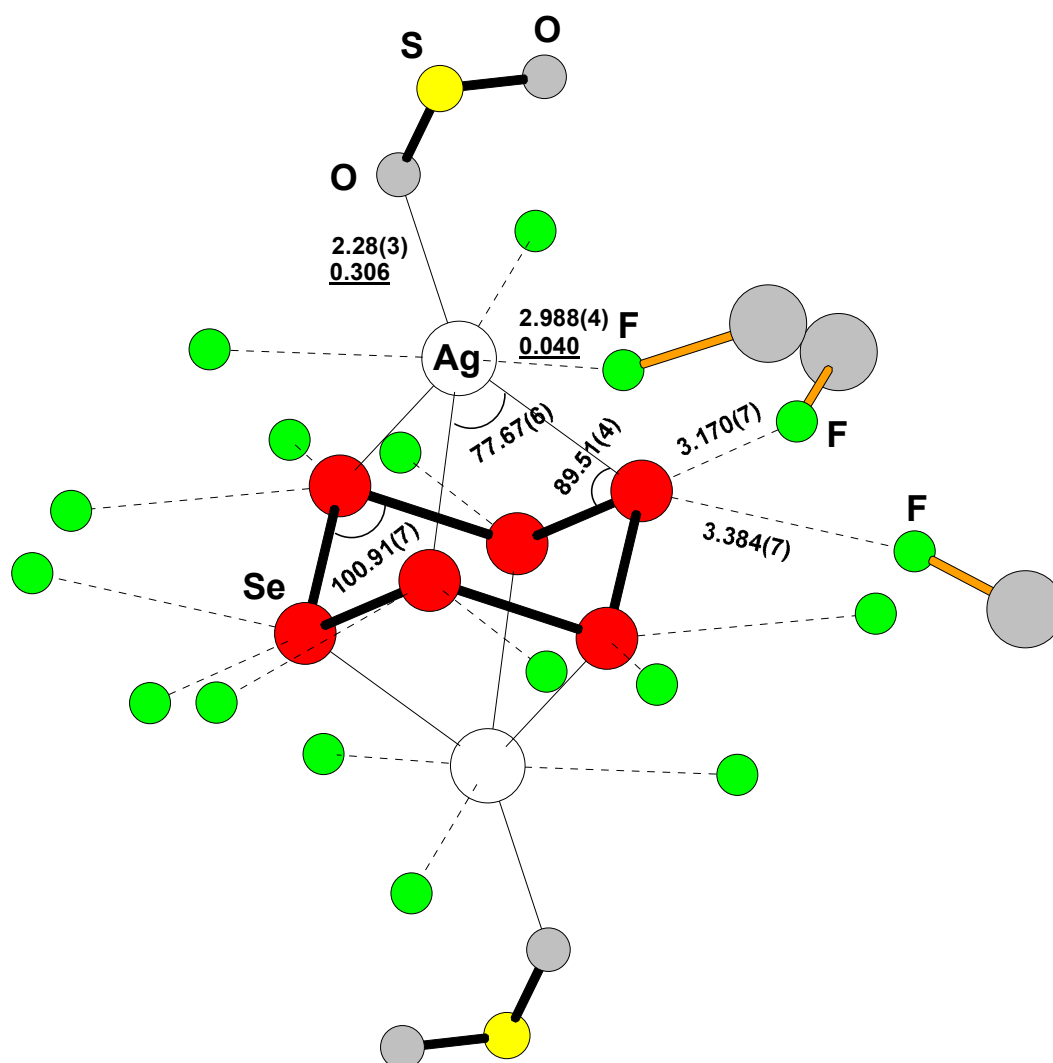

Figure S2.1.4: Coordination sphere of “ $\text{Se}_6\text{Ag}_2$ ” in **1** including one of the three disordered  $\text{SO}_2$  molecules

Each silver atom in the  $[(\text{OSO})\text{AgSe}_6\text{Ag}(\text{OSO})]^{2+}$  dication is coordinated to one  $\text{SO}_2$  molecule, with a threefold axis incorporating all sulphur and silver atoms passing through the cation, and the  $\text{SO}_2$  molecules rotationally disordered around the threefold axes such that the required site symmetry ( $D_{3d}$ ) is maintained. All three equivalent positions were found for each oxygen atom (S2.1.5).

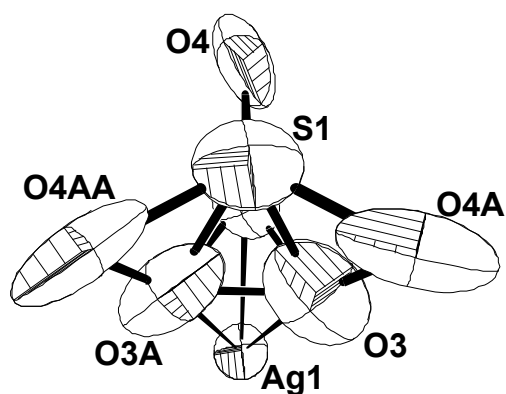

Figure S2.1.5: Threefold rotational disorder of the SO<sub>2</sub> molecule in **1** lying on the threefold axes running through the S-Ag-Ag-S vector as represented by one Ag(SO<sub>2</sub>) unit. The thermal ellipsoid are drawn at the 25% probability level.

Correspondingly the standard deviations of the S-O [1.36(3) and 1.37(3) Å] and Ag-O [2.28(3) and 3.47(3) Å] distances are very high. The “AgSO<sub>2</sub>” geometry (bond lengths and angles) in **1** is comparable to that in Ag(SO<sub>2</sub>)[Al(OC(CF<sub>3</sub>)<sub>3</sub>)<sub>4</sub>]<sup>5</sup> (S2.1.6/S2.1.7).

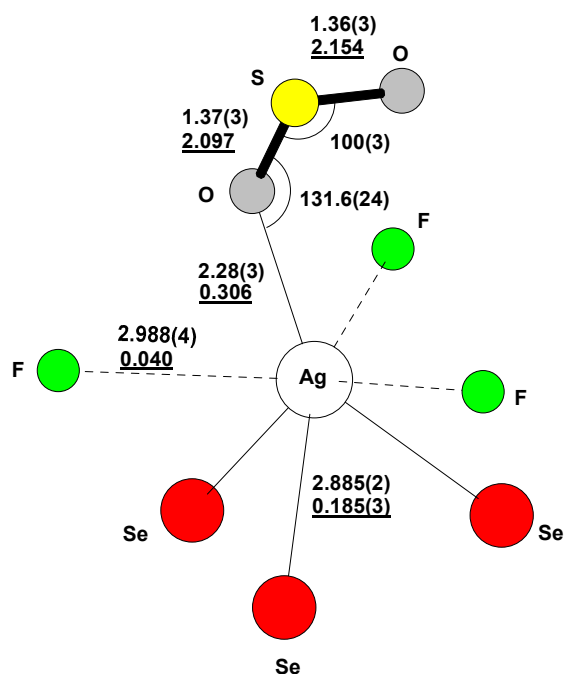

a) “AgSO<sub>2</sub>” in **1**

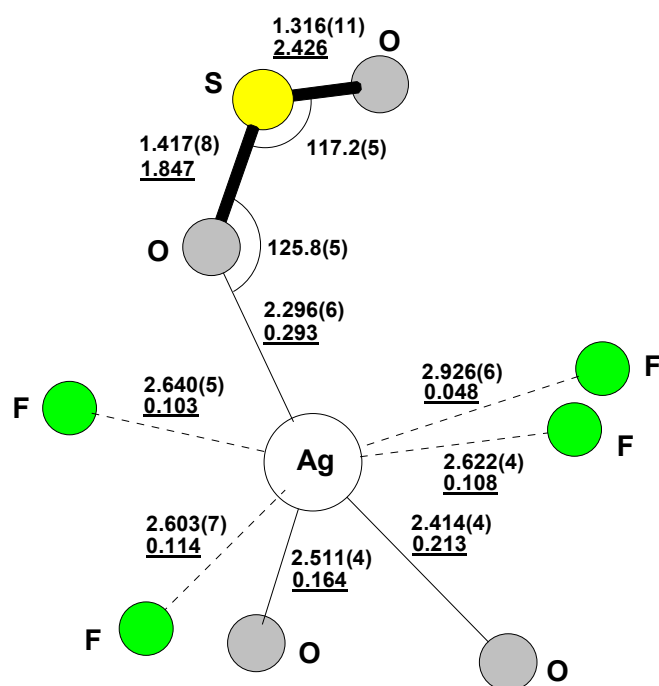

b) "AgSO<sub>2</sub>" in Ag(SO<sub>2</sub>)[Al(OC(CF<sub>3</sub>)<sub>3</sub>)<sub>4</sub>]

Figure S2.1.6: Comparison of "AgSO<sub>2</sub>" in **1** (containing one of the three disordered SO<sub>2</sub> molecules) and in Ag(SO<sub>2</sub>)[Al(OC(CF<sub>3</sub>)<sub>3</sub>)<sub>4</sub>]

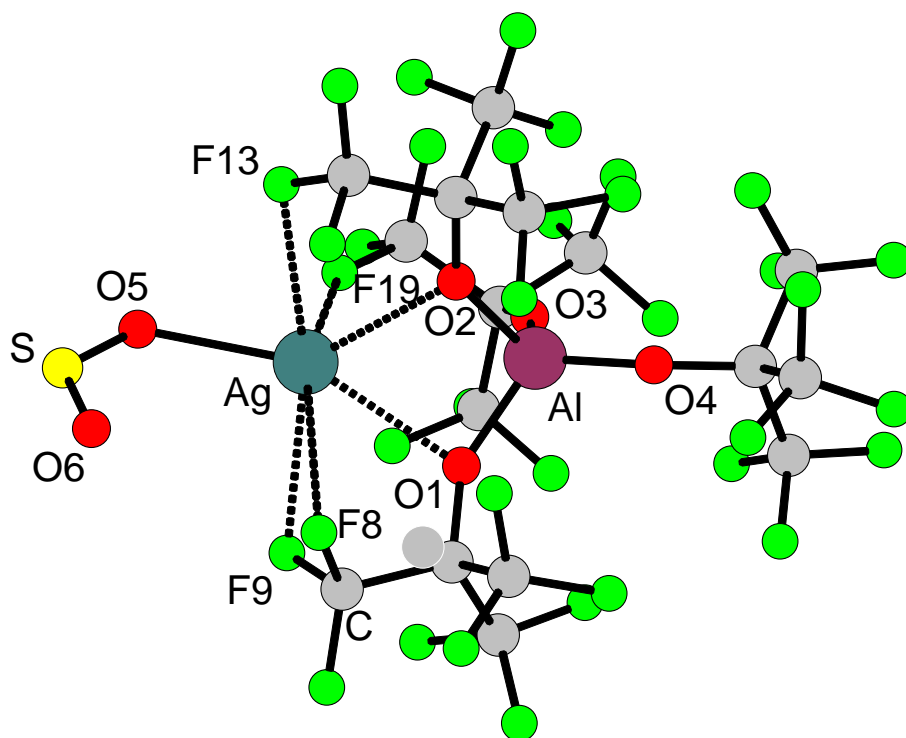

Figure S2.1.7: Crystal structure of [Ag(OSO)][Al(OC(CF<sub>3</sub>)<sub>3</sub>)<sub>4</sub>].

Each silver atom has three equivalent fluorine contacts ( $d(\text{Ag-F}) = 2.988(4) \text{ \AA}$ ) which are shorter than the sum of their Van der Waals radii ( $3.20 \text{ \AA}$ ) (S2.1.4). All other contacts are greater than  $4.154 \text{ \AA}$ . This may be compared to similar Ag-F contacts in  $[\text{Ag}(\text{CH}_2\text{Cl}_2)_2][\text{Ti}(\text{OTeF}_5)_6]$  which lie between  $3.028(7)$  and  $3.034(7) \text{ \AA}$ .  $[\text{Ag}(\text{CH}_2\text{Br}_2)_3][\text{Sb}(\text{OTeF}_5)_6]$  has only one Ag-F contact at  $d(\text{Ag-F}) = 3.196(7) \text{ \AA}$ .<sup>6</sup> Since  $\text{Ti}(\text{OTeF}_5)_6^{2-}$  is a (more basic) dianion and the Ag-F contacts in both species are longer than those observed in **1** this suggests the presence of a more electrophilic (electron deficient) Ag atom in  $[(\text{OSO})\text{AgSe}_6\text{Ag}(\text{OSO})][\text{Sb}(\text{OTeF}_5)_6]_2$ . However, if one compares the above given Ag-F contacts of about  $2.99$  to  $3.20 \text{ \AA}$  to the shorter Ag-F interactions in  $[\text{Ag}(\text{PPh}_3)_2][\text{BF}_4]$  ( $2.67 \text{ \AA}$ ) and  $[\text{Ag}(\text{PPh}_3)_2(\text{CH}_3\text{CN})][\text{BF}_4]$  ( $2.65 \text{ \AA}$ ),<sup>7</sup> the  $[\text{M}(\text{OTeF}_5)_6]^{n-}$  ( $\text{M} = \text{Sb}, \text{Ti}, n = 1, 2$ ) anions are seen to be very weakly coordinating. Ag-F contacts are provided by one fluorine atom from each of the three anions of one of the triangular faces of the octahedron surrounding the dication. The silver atoms are seven-coordinated (S2.1.8), common to more ionic  $\text{Ag}^+$  complexes.<sup>8</sup> A similar environment to the silver atom despite Ag-F contacts in **1** is found in  $[\text{Ag}_4\text{I}_4(\text{PPh}_3)_4]$  containing a  $(\text{AgI})_4$  heterocubane core and terminal  $\text{PPh}_3$  ligands, i.e. the Se atoms in (S2.1.8) are replaced by iodine and the oxygen atom (X) by phosphorus.<sup>9</sup>

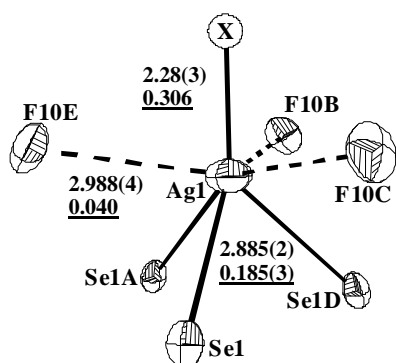

Figure S2.1.8: Coordinative environment of the Ag1 atom in **1**. X denotes the centre of the three disordered oxygen positions of the coordinated OSO. Bond length:  $\text{Å}$ , bond valence: v.u. The thermal ellipsoid are drawn at the 25% probability level.

The almost spherical  $[\text{Sb}(\text{OTeF}_5)_6]^-$  anion consists of a central  $\text{SbO}_6$  octahedron and six surrounding  $\text{OTeF}_5$  octahedra (Fig. S2.1.9). Axial and equatorial Te-F bond lengths are indistinguishable within the

standard deviations and range from 1.77(2) to 1.839(8) Å. One of the two OTeF<sub>5</sub> groups in the asymmetric unit of **1** is rotationally disordered. Two orientations of the four equatorial fluorine atoms are occupied in a 60 : 40 ratio. Average Te-F [1.810(7-20) Å], Te-O [1.829(6)] and Sb-O [1.946(7) Å] distances and average Sb-O-Te bond angles of 142.1(4) ° are in the range of other known [Sb(OTeF<sub>5</sub>)<sub>6</sub>]<sup>-</sup> anions.<sup>10</sup>

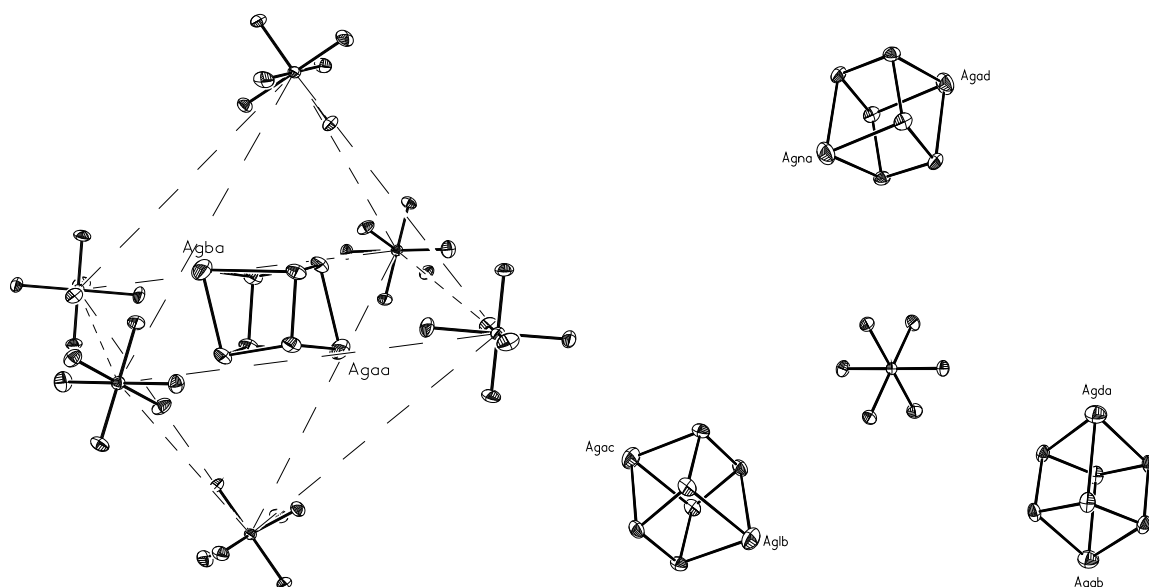

Figure S2.1.9: Ortep representations of the octahedral cation and trigonal anion environment in [(OSO)AgSe<sub>6</sub>Ag(OSO)][Sb(OTeF<sub>5</sub>)<sub>6</sub>]<sub>2</sub> **1**. All fluorine, tellurium atoms and the SO<sub>2</sub> molecules are omitted for clarity. Thermal ellipsoids are drawn at the 25 % probability level.

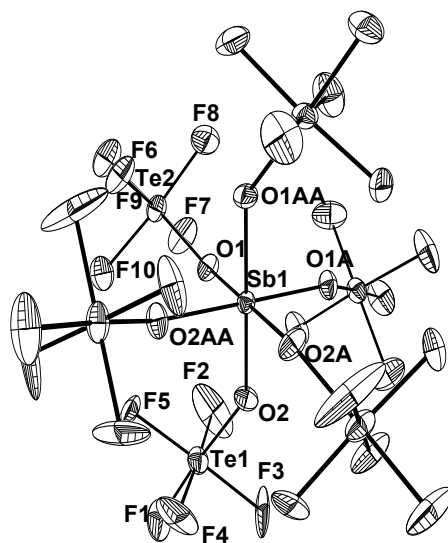

Figure S2.1.10: The  $\text{Sb}(\text{OTeF}_5)_6^-$  anions in **1**. Thermal ellipsoids are drawn at the 25 % probability level.

Table S2.1.11: Structural parameters of the  $\text{Sb}(\text{OTeF}_5)_6^-$  anions

| Parameters                            | [NR <sub>4</sub> ][Sb(OTeF <sub>5</sub> ) <sub>6</sub> ] |                 | <b>1</b>          |
|---------------------------------------|----------------------------------------------------------|-----------------|-------------------|
|                                       | R = Me                                                   | R = Et          |                   |
| d(Te-F <sub>ax</sub> ) <sub>av.</sub> | 1.79(2)                                                  | 1.76(2)         | 1.811(7)          |
| Range                                 |                                                          |                 | 1.808(7)–1.814(7) |
| d(Te-F <sub>eq</sub> ) <sub>av.</sub> | 1.74(2)                                                  | 1.70(2)         | 1.809(7-20)       |
| Range                                 |                                                          |                 | 1.77(2)–1.839(8)  |
| d(Te-O) <sub>av.</sub>                | 1.78(1)                                                  | 1.74(1)         | 1.829(6)          |
| d(Sb-O) <sub>av.</sub>                | 1.91(1)                                                  | 1.87(1)         | 1.946(7)          |
| Sb-O-Te (av.)                         | 150.9(8)                                                 | 162.8(9)        | 142.1(4)          |
| Range                                 | 148.4(8)-153.4(8)                                        | 160.7(9)–167(1) | 141.0(4)-143.2(4) |
| R (R <sub>w</sub> )                   | 5.48 % (4.61 %)                                          | 7.10 % (5.99 %) | 5.01 % (7.85 %)   |

## S 2.2 Crystal structure of **2a**

**2a**: In contrast to **1** a single crystal X-ray structure determination of **2a** showed also the  $[(\text{OSO})\text{AgSe}_6\text{Ag}(\text{OSO})]^{2+}$  structural unit, but an additional  $\text{SO}_2$  molecule is coordinated to each silver atom (Figure 1b in paper). The anion  $[\text{Al}(\text{OC}(\text{CF}_3)_3)_4]^-$  forms double layers. Each double layer includes a slightly associated cation strand (S2.2.1).



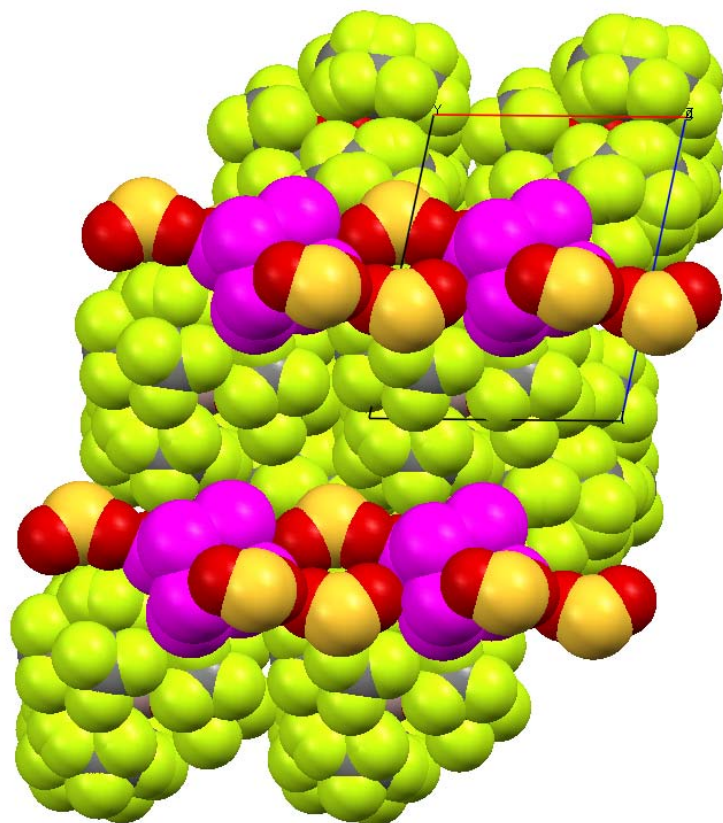

Figure S2.2.1: Space Filling representation of **2a** showing the anion double layer and the cation strand.

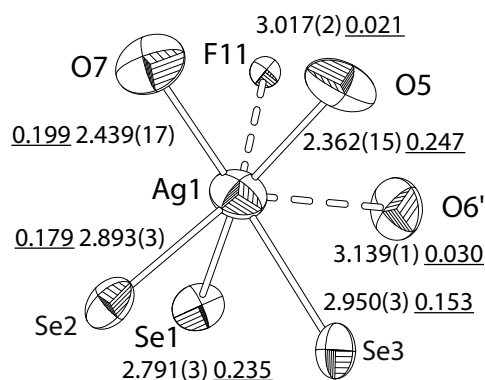

Figure S.2.2.2: Coordination Sphere of Ag1 in **2a**. O6' is a secondary contact to SO<sub>2</sub> coordinated to the next cation. Bond Valences v.u. are underlined. Distances in Å. The thermal ellipsoids are shown with 50% probability (F is isotropic).

The cation again contains a nearly  $D_{3d}$ -symmetric distorted [Ag<sub>2</sub>Se<sub>6</sub>]-cube and two types of SO<sub>2</sub>-molecules coordinated to silver. One with a shorter Ag1-O3 distance of 2.362(15) Å; another one with a longer Ag1-O distance of 2.439(17) Å. The former has a secondary contact below the sum of van der

Waals radii to the silver atom of the next cation ( $d = 3.139 \text{ \AA}$ ) and vice versa, resulting in a kind of double bridge (Figure S2.2.3).

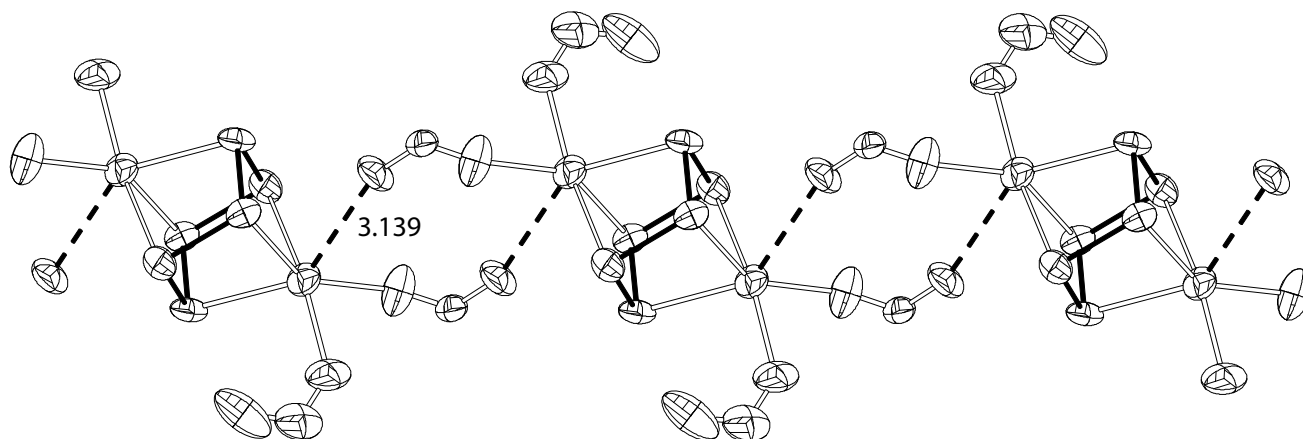

Figure S2.2.3: Section of the cation layer of **2** with Ag – O contacts (dashed lines/distance in Å). Thermal ellipsoids are shown with 50% probability.

Moreover five F-(O-S-O) (2xO/2xS/1xO) contacts within a limit of  $3.20 \text{ \AA}$  are found (contacts to disordered F atoms in minority positions are not taken into account). The latter  $\text{SO}_2$  points at the voids of the anion layer and thus prevents formation of directing Ag---F contacts and thus leads to the formation of completely disordered  $\text{C}(\text{CF}_3)_3$  moieties in the proximity. On the one hand the  $[\text{Ag}(\text{OSO})_2]$ -unit is comparable to **1** and  $[\text{Ag}(\text{OSO})][\text{Al}(\text{OC}(\text{CF}_3)_3)_4]^5$  with somewhat longer Ag1-O bond distances, on the other hand to  $[\text{Ag}(\text{OSO})_{2/2}][\text{SbF}_6]^5$  which features a true  $\eta_2\text{-O}_2\text{O}'$  bridging, also found in the lithium salt  $[\text{Li}_2(\text{SO}_2)_8][\text{B}_{12}\text{Cl}_{12}]^{11}$ .

All S-O distances ( $d(\text{SO}) = 1.344(16), 1.402(14), 1.36(3), 1.406(19)$ ) appear slightly shorter than in gaseous  $\text{SO}_2$ , likely due to libration and/or disorder. The (Ag-)OSO(-Ag) angle is greater ( $121.6^\circ$ ) and shorter (Ag-)OSO ( $116.3^\circ$ ) than in gaseous  $\text{SO}_2$  ( $119.5^\circ$ )<sup>12</sup>.

The  $[\text{Ag}_2\text{Se}_6]$ -heterocubane itself also contains the  $\text{Se}_6$ -ring in chair conformation, the structural parameters of which are in very good agreement with  $\text{Se}_6$  and **1** (Table 1, Figure 1 in the main text). There are three different Ag-Se distances ( $d(\text{Ag1-Se1}) = 2.791(3) \text{ \AA}$ ;  $d(\text{Ag1-Se2}) = 2.893(3) \text{ \AA}$ ;  $d(\text{Ag1-Se3}) = 2.950(3) \text{ \AA}$ ) representing the deviation from ideal  $D_{3d}$ -symmetry. Compared to **1** ( $D_{3d}$ ), over

$\text{Se}_6\text{I}_2^{2+}$  ( $C_{2h}$ ) this is a symmetry reduction to point group  $C_i$ . This may be due to the asymmetry of different coordination sites to silver as well as packing effects.

Moreover there is a Ag-F-contact (below the sum of vdW radii of 3.014 Å which is in good agreement distances discussed in the previous section (Figure S2.2.2). Thus in addition to the Ag-O secondary contact Silver shows a seven-fold coordination, favoured in those compounds. This is analogous to **1** in which the silver atom bears three fluorine contacts. The valence sum<sup>13</sup> is 1.063 and close to one. This is again an example for the electron deficiency of  $\text{Ag}^+$  saturated through OSO directly (1st sphere) and F/O indirectly (2nd sphere). Moreover several Se-F contacts (<3.2 Å) are found speaking of positive charge delocalization from silver to selenium. (S2.2.3)

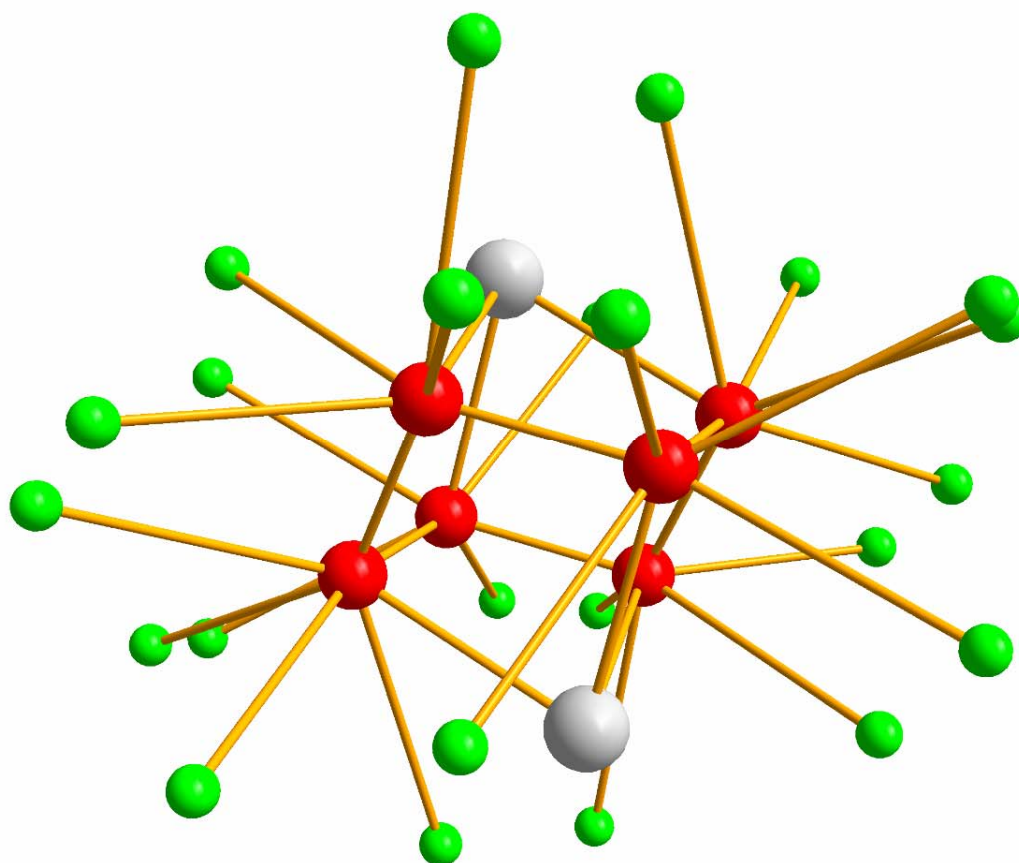

Figure S2.2.3: Se –F contacts below 3.2 Å in **2**.

The anion  $[\text{Al}(\text{OC}(\text{CF}_3)_3)_4]^-$  is nearly spherical, contains a  $[\text{AlO}_4]$ -tetrahedron and shows rotational disorder of one  $\text{CF}_3$  and of two  $\text{C}(\text{CF}_3)_3$  groups (S2.2.4) which are typical for this kind of anion<sup>14</sup>. The disordered  $\text{CF}_3$ -group (occupation ratio 32 : 68) could not be refined anisotropically and therefore the contact to  $\text{SO}_2$  leads to high standard deviations in the structural parameters. Moreover two perfluoro-*tert*-butoxy-groups are disordered, one with an occupation ratio of 55:45, another one with 35: 65. Major occupation sites could refined anisotropic, the minor sites were refined isotropic. Due to this disorder the data : parameter ratio reaches 7.9 / 1.<sup>15</sup>

The Al-O distances reach from 1.685(14) Å to 1.717(12) Å, typically for a highly disordered anion<sup>16</sup> and bearing uncommonly short Al-O bonds due to librational effects.

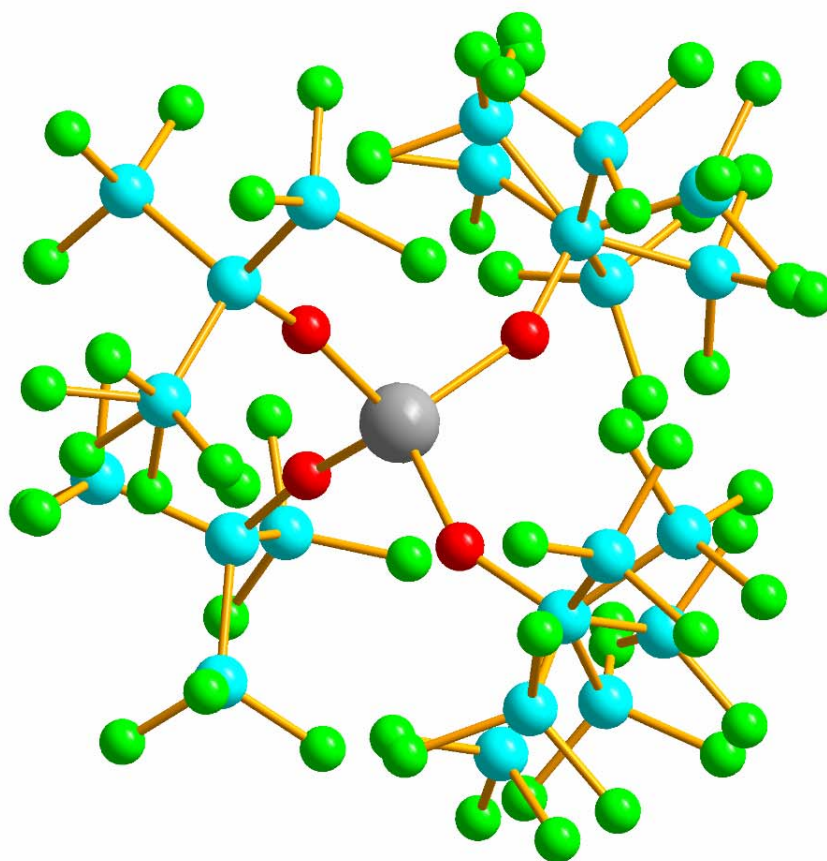

Figure S2.2.4: Representation of the disorder in the anion  $[\text{Al}(\text{OC}(\text{CF}_3)_3)_4]^-$  in **2a**.

## S 2.3 Crystal structure of **3**

**3: 3** is constructed from a polymeric  $(\text{AgSe}_6^+)_n$  cation (see Figure 1b and 5a main text) and the honeycomb-like  $[\text{Ag}_2(\text{SbF}_6)_3]^-$  anion (S2.3.5). The  $(\text{AgSe}_6^+)_n$  cation can be viewed as containing a 1-dimensional polymeric chain of  $(\text{AgSe}_6^+)_n$  cations containing a one dimensional stack of close packed  $\text{Se}_6$  molecules with  $\text{Ag}^+$  residing in the octahedral holes. This increases the distance between  $\text{Se}_6$  molecules from 4.43(1) Å in  $\text{Se}_6$  (solid)<sup>17</sup> to 5.377(2) Å in **3**, and to 5.290(2) Å in **4** (S2.3.1).

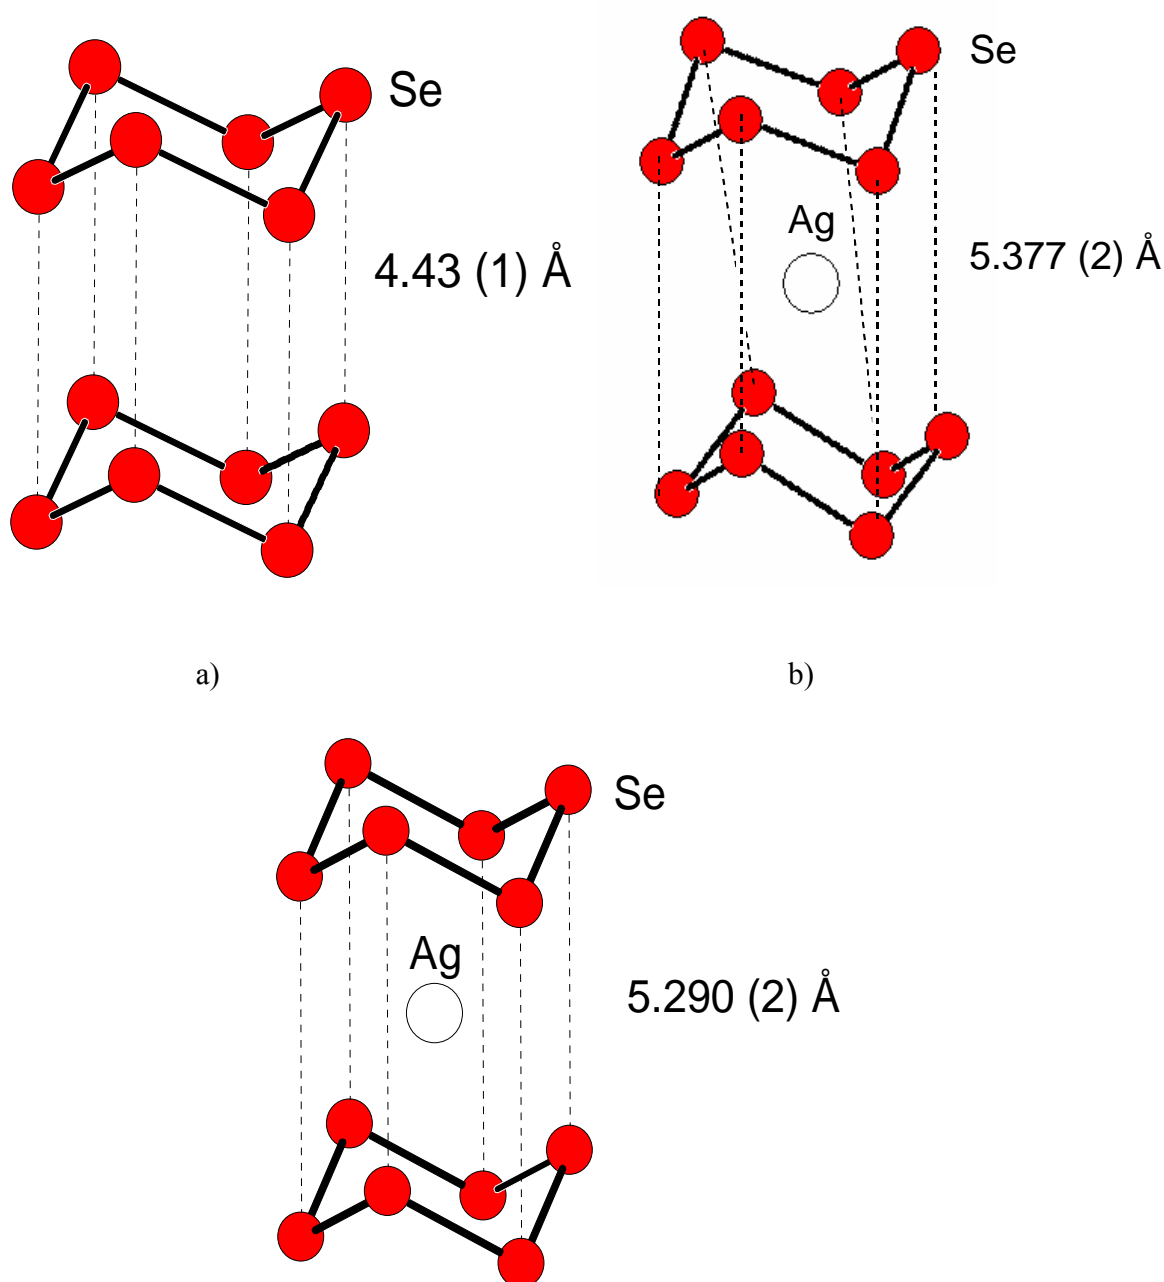

c)

Figure S2.3.1: Distances between  $\text{Se}_6$  rings in a) neutral  $\text{Se}_6$  (s), b) **3**, and c) **4**. The distances were calculated as the average of the distances between corresponding Se atoms of adjacent  $\text{Se}_6$  rings as indicated above.

A heterocubane like  $\text{Ag}_1\text{Se}_6\text{Ag}_1$  portion of the stack is similar to the  $\text{Ag}_2\text{Se}_6^{2+}$  core in **1** and **2**. Similar columns containing a metal ion and a ring of selenium, tellurium and arsenic are present in related species, e.g.  $(\text{RbSe}_8^+)_n$  in  $\text{Rb}_2[\text{Pd}(\text{Se}_4)_2]\text{Se}_8$  (S2.3.2)<sup>18</sup>,  $(\text{CsTe}_8^+)_n$  in  $\text{Cs}_4\text{Te}_{28}$ ,<sup>19</sup>  $(\text{MoAs}_8^{2-})_n$  in  $[\text{K}(2,2,2\text{-crypt})]_2[\text{MoAs}_8]\text{NH}_2(\text{CH}_2)_2\text{NH}_2$ <sup>20</sup> and  $[\text{Rb}(\text{NbAs}_8^-)]_n$  in  $[\text{Rb}(2,2,2\text{-crypt})]_2[\text{Rb}(\text{NbAs}_8)]$ .<sup>21</sup> It appears that the size and the coordination number of the group 15 and 16 rings are affected by the size of metal cation.

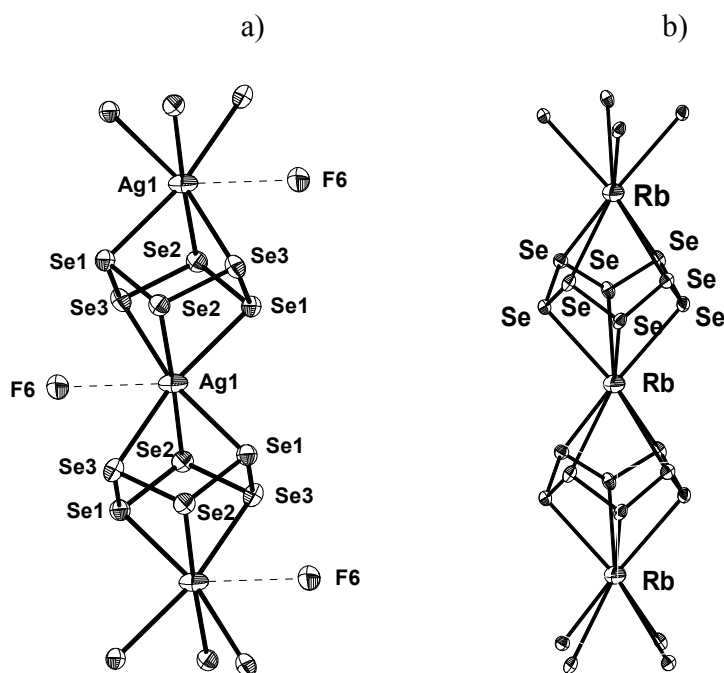

Figure S2.3.2: Structures of  $(\text{AgSe}_6^+)_n$  in **3** and the  $[\text{Rb}(\text{Se}_8)^+]$  chain cation in  $\text{Rb}_2[\text{Pd}(\text{Se}_4)_2]\text{Se}_8$ . The thermal ellipsoid are drawn at the 50% probability level.

The silver atom (Ag1) in the “Se<sub>6</sub>Ag” chain has only one fluorine contact ( $d(\text{Ag1-F6}) = 3.095(9) \text{ \AA}$ , 0.03 v.u.;  $\Sigma$  van der Waals radii of Se and Ag<sup>+</sup> is 3.20  $\text{\AA}$ ) (see Figure 5a and S2.3.3) in the second coordination sphere of Ag1.

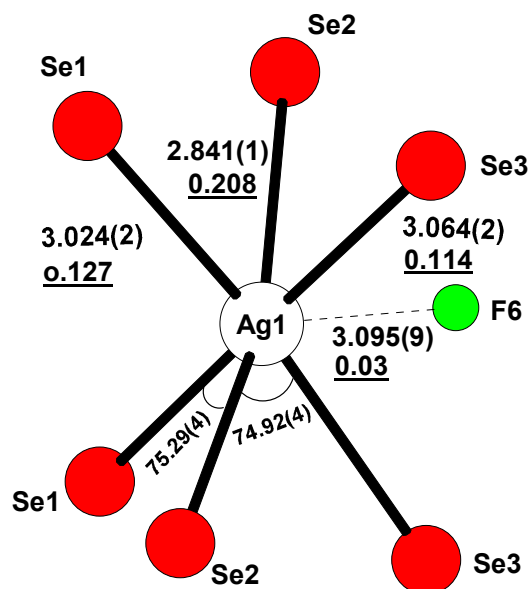

a)

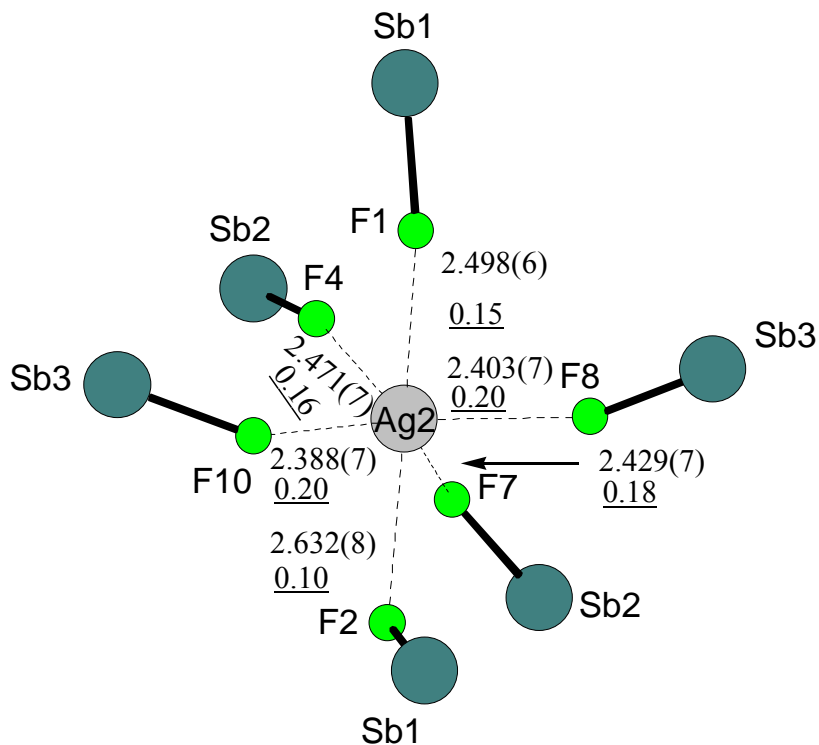

b)

Figure S2.3.3: Coordination spheres of Ag1 and Ag2 in **3**

Although the contact is weak, it directs the Ag<sup>+</sup> ion away from a straight line down the stack axis and leads to unequal Ag-Se bond lengths and SeAgSe angles (Figure 1b and S2.3.3 ). Each selenium atom has two contacts to the fluorine atoms (2.912(7) – 3.218(8) Å), which are below the sum of their van der Waals radii (3.40 Å) (S2.3.4). These Ag1-F and Se-F contacts are comparable to those in **1** and **2**.

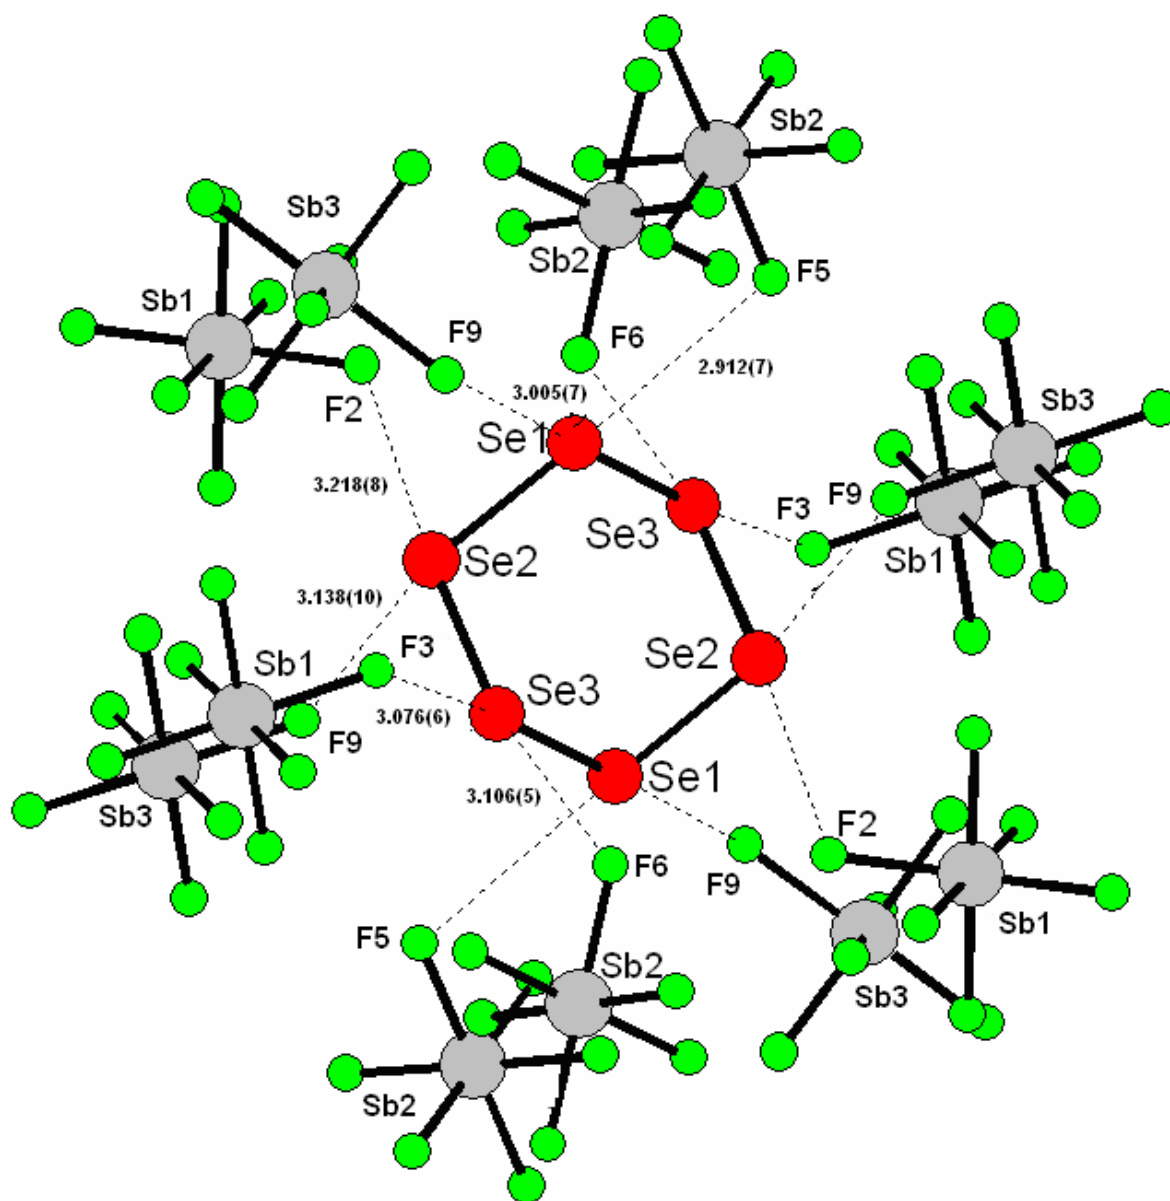

Figure S2.3.4: The anion-Se<sub>6</sub> contacts in **3**



The anion is constructed from two silver cations and three  $\text{SbF}_6^-$  anions per  $[\text{AgSe}_6]^+$  link of the polymeric cation chain. The hexagonal channels, in which the cationic chains reside, are formed by the interaction of silver cations with fluorine atoms from each  $\text{SbF}_6^-$  anions (Figure S2.3.5). Six silver atoms reside at each corner of the hexagonal cavity and contact six bridging  $\text{SbF}_6^-$  units (Figure S2.3.5 b) The surface of the channels along the a-axis can be viewed as an eight-membered ring (2 Sb, 4F and 2Ag) crossed net (Figure 2.3.5 c).

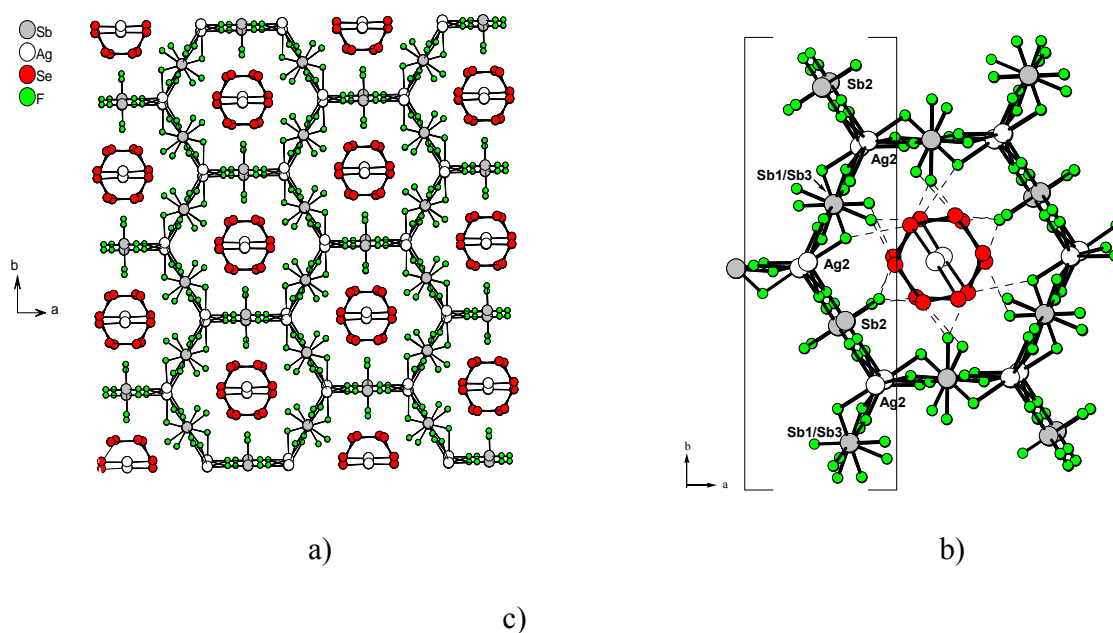

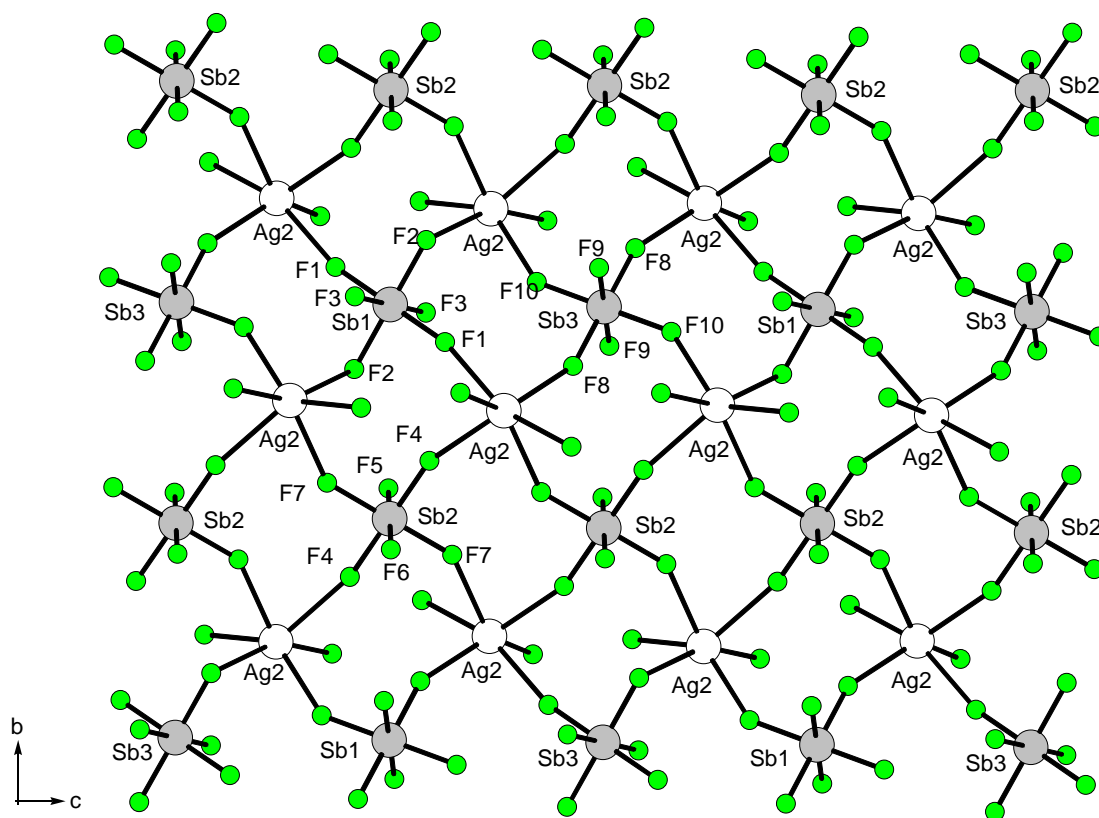

Figure 2.1.5: a) view of **3** down the *c*-axis; b) an expansion of a portion of **3** down the *c*-axis; c) a side-view down the *a*-axis of the highlighted part in the bracket of Figure b.

Three types of  $\text{SbF}_6^-$  units are observed within the complex anion, differing in the orientation towards their neighbouring silver atoms and towards the  $[\text{AgSe}_6]^+$  chain. Each individual  $\text{SbF}_6^-$  unit is structurally unremarkable (Sb-F in range 1.859(6)-1.884(6) Å, F-Sb-F angles  $90 \pm 0.7$  or  $180 \pm 0.2^\circ$ ) (S2.3.6).

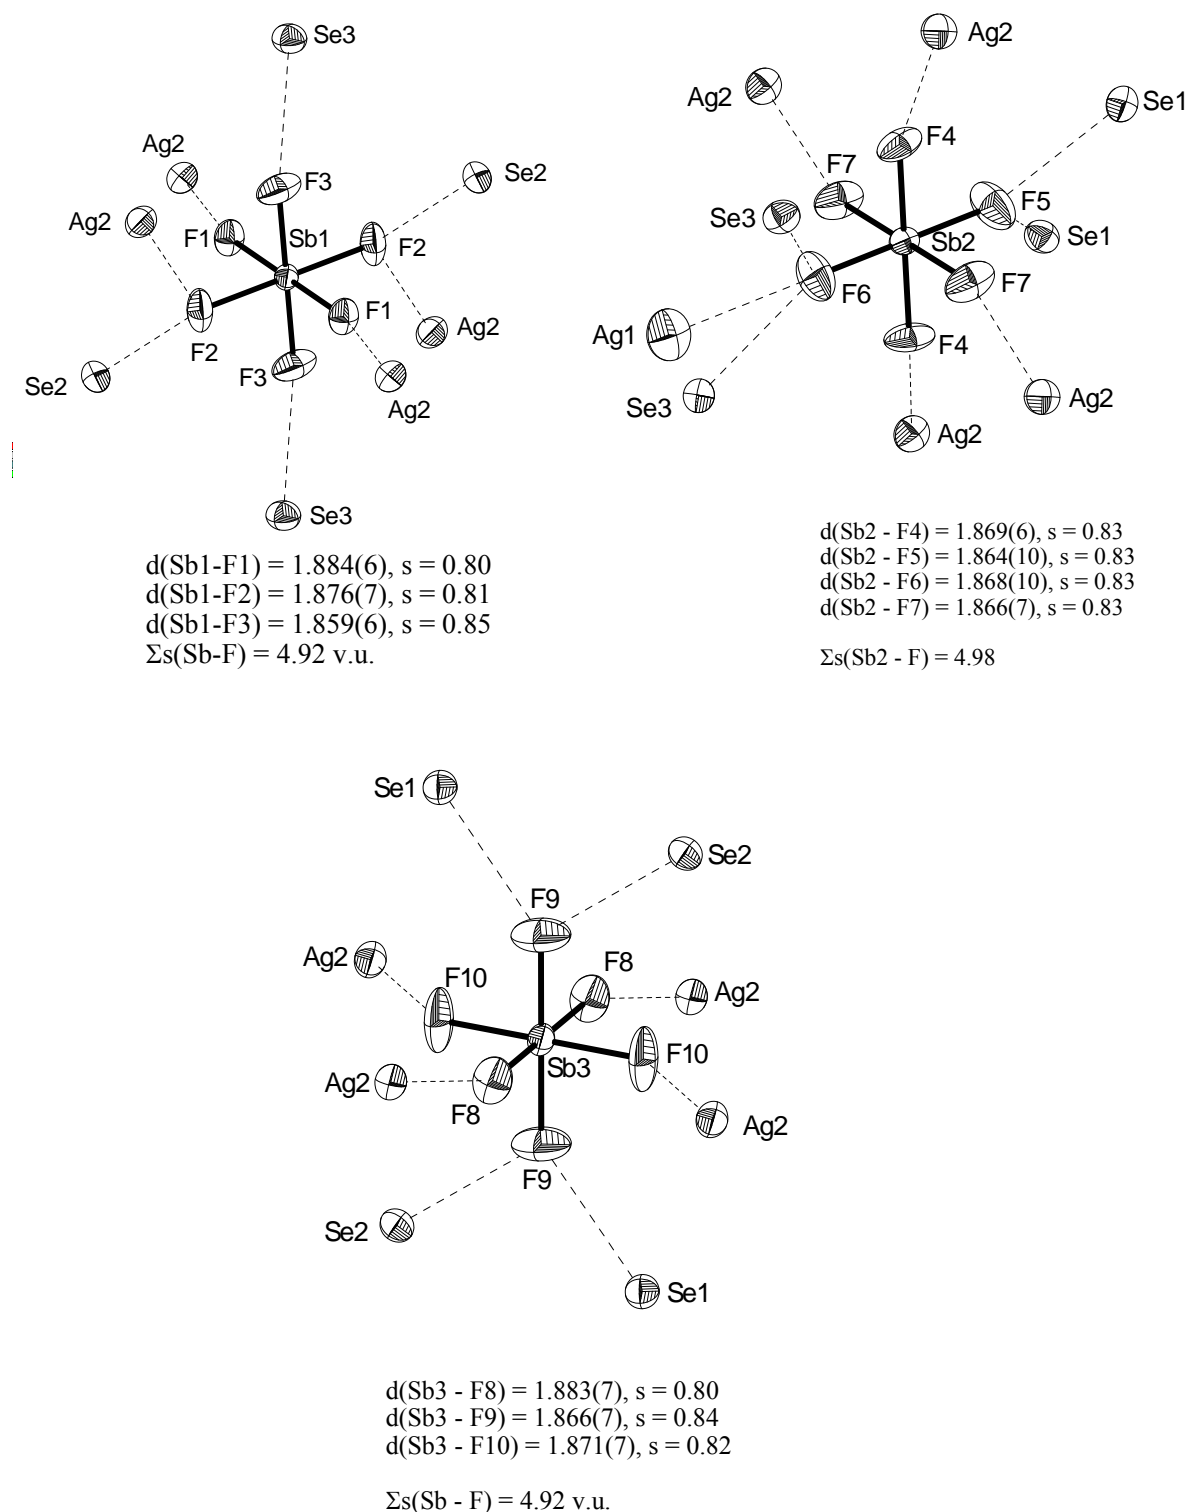

Figure S2.3.6: Coordination spheres of  $\text{Sb1F}_6^-$ ,  $\text{Sb2F}_6^-$  and  $\text{Sb3F}_6^-$  in **3**. Thermal ellipsoids are drawn at the 50 % probability level.

The Sb-F distances are essentially independent of whether the fluorine atoms are weakly linked to  $\text{Ag}^+$  or the  $\text{Se}_6$  ring of  $(\text{AgSe}_6^+)_n$  implying the selenium atom in  $\text{Se}_6$  are also positively charged. Sb1 and Sb3 are superimposed along the c-axis while the Sb2 atoms are alternatively displaced either side due to

the Sb<sub>2</sub>-F(6)---Ag1 interaction that leads to the distortion of the (AgSe<sub>6</sub><sup>+</sup>)<sub>n</sub> stack (Figure 2.3.2 and S2.3.9).

Neutral chalcogenide rings stabilized in a host structure is relatively rare. There are even fewer metal chalcogenide complex directed 2D and 3D host structures. Several examples are reported as encapsulated in 2D host structures, such as (Cs(S<sub>8</sub>)<sup>+</sup>)<sub>n</sub> in Cs<sub>2</sub>Sn<sub>3</sub>S<sub>7</sub>0.5S<sub>8</sub>,<sup>22</sup> [Cs(Te<sub>8</sub>)<sup>+</sup>]<sub>n</sub> in Cs<sub>3</sub>Te<sub>22</sub>, and [Rb(Se<sub>8</sub>)<sup>+</sup>]<sub>n</sub> in Rb<sub>2</sub>[Pd(Se<sub>4</sub>)<sub>2</sub>]<sub>2</sub>Se<sub>8</sub> (Figure S2.3.7 a). Columns of [Cs(Te<sub>8</sub>)<sup>+</sup>]<sub>n</sub> in Cs<sub>4</sub>Te<sub>28</sub> are inserted into an anionic 3D telluride [Te<sub>20</sub><sup>4-</sup>] framework. Few examples<sup>23-26</sup> of host framework based on simple inorganic salts are known, all of which are constructed from AgNO<sub>3</sub> or from its components e.g. Ag(NO<sub>3</sub>)<sub>3</sub><sup>2-</sup>. A striking example is C<sub>60</sub>{Ag(NO<sub>3</sub>)<sub>3</sub>}<sub>5</sub> in which the zeolite-like [(AgNO<sub>3</sub>)<sub>5</sub>] network hosts the fullerene guest. The polymeric (Se<sub>6</sub>Ag<sup>+</sup>)<sub>n</sub> promoted honeycomb-like net,<sup>27-29</sup> formed by [Ag<sub>2</sub>(SbF<sub>6</sub>)<sub>3</sub>]<sup>-</sup> in **3** is comparable to that of {[Ag(NO<sub>3</sub>)<sub>3</sub>]<sup>2-</sup>}<sub>n</sub> in [Ag<sub>5</sub>L<sub>3</sub>(NO<sub>3</sub>)<sub>3</sub>][Ag(NO<sub>3</sub>)<sub>3</sub>]<sub>3</sub>CHCl<sub>3</sub> (L = bipyridine-Schiff-base ligand) (Figure S2.3.7 b).

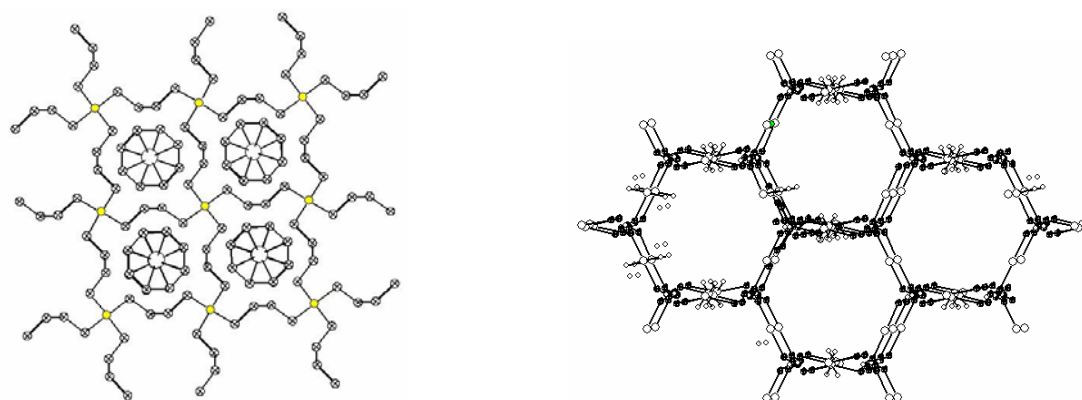

Figure S2.3.7: a) A view of Rb<sub>2</sub>[Pd(Se<sub>4</sub>)<sub>2</sub>]<sub>2</sub>Se<sub>8</sub>; b) A view of the [Ag(NO<sub>3</sub>)<sub>2</sub>]<sub>n</sub> framework in [Ag<sub>5</sub>L<sub>3</sub>(NO<sub>3</sub>)<sub>3</sub>][Ag(NO<sub>3</sub>)<sub>3</sub>]<sub>3</sub>CHCl<sub>3</sub> (L = bipyridine-Schiff-base ligand).

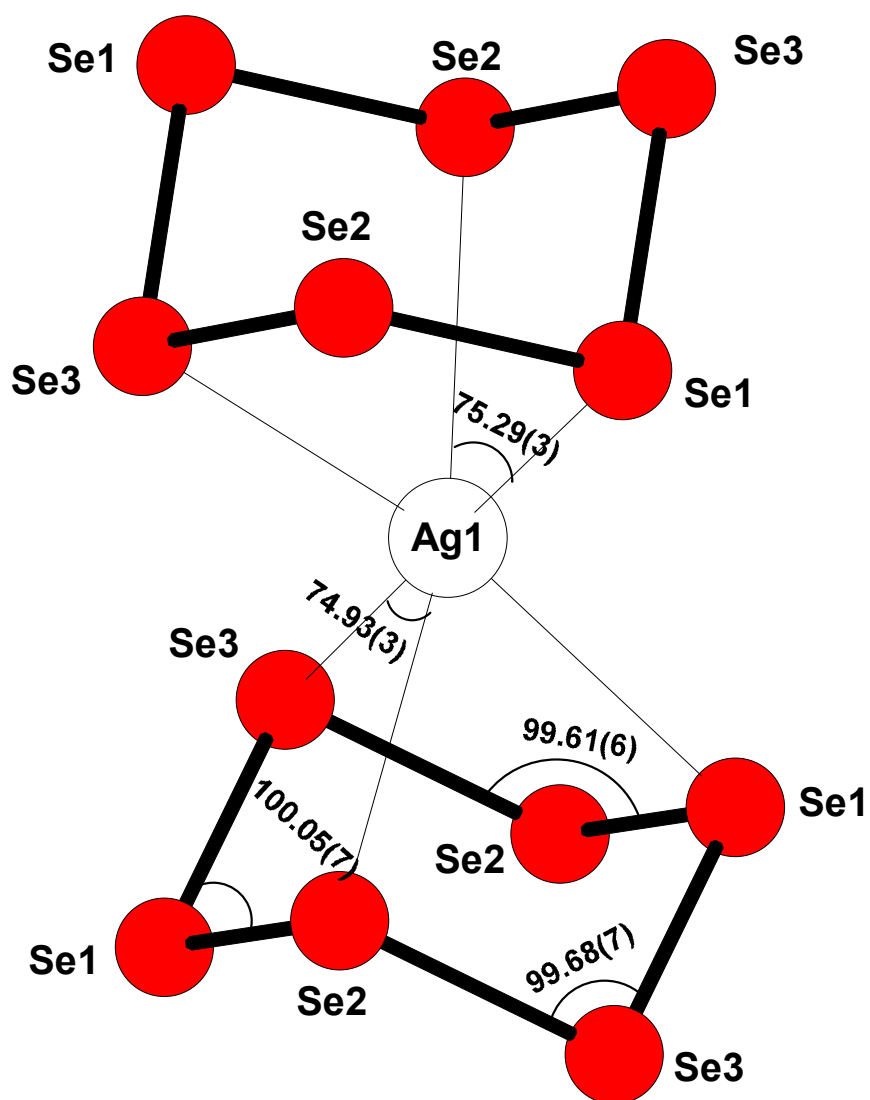

Figure S2.3.8: Bond angles in **3**

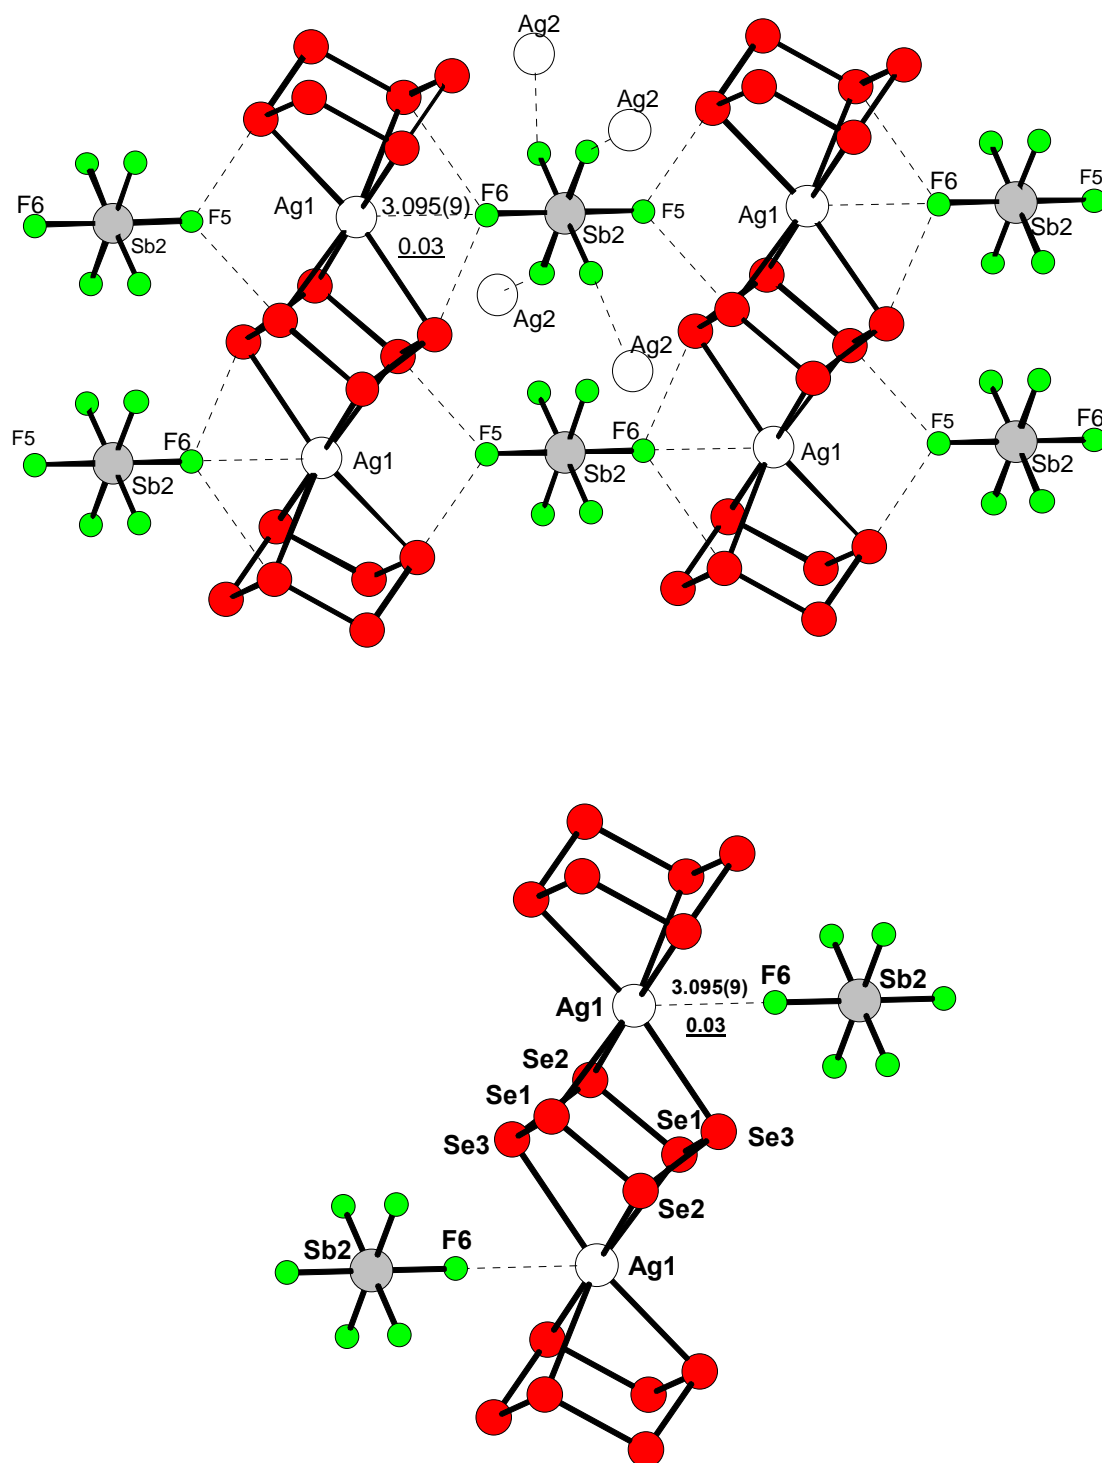

Figure S2.3.9: A detailed and simplified view of F6 (from Sb3)-Ag1 interactions in **3**

## S 2.4 Crystal structure of **4**

**4**: The  $[(\text{AgSe}_6\text{Ag})^{2+}]_n$  cation in **4** consists of an infinite two-dimensional cation containing polymeric chains of  $[\text{Ag}_1\text{Se}_6^+]_n$  cross-linked by silver ( $\text{Ag}_2$ ) cations (Figure 1d in main text and S2.4.1).

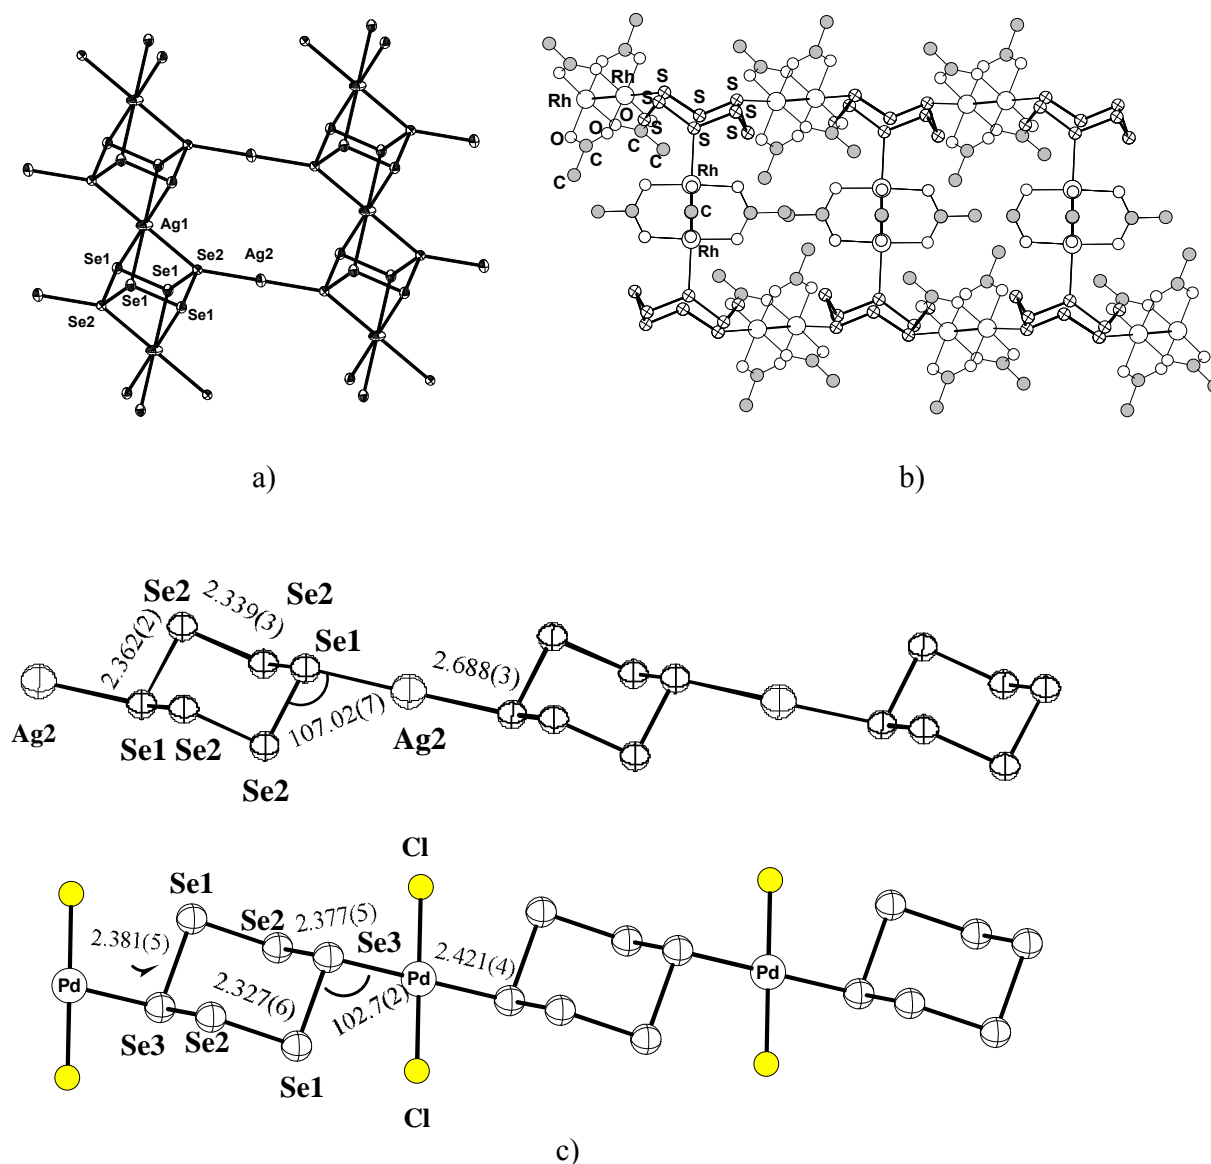

Figure S2.4.1: a) Structure of the  $[(\text{AgSe}_6\text{Ag})^{2+}]_n$  cation in **4**; The thermal ellipsoids are drawn at the 50% probability level; b) Structure of  $[\text{Rh}_2(\text{O}_2\text{CCF}_3)_4]_3(\text{S}_8)_2$ ; c) Comparison of the “ $(\text{Ag}_2\text{Se}_6)_n$ ” fragment in  $[(\text{AgSe}_6\text{Ag})^{2+}]_n$  and the  $\text{PdCl}_2\text{Se}_6$  geometries in the solid state.

The  $[\text{Ag}_1\text{Se}_6^+]_n$  stacks can be described similarly as for the related stacks in **3**. Adjacent  $[\text{Ag}_1\text{Se}_6^+]_n$  stacks are linked by shorter, linear  $\text{Se}_6\text{-Ag}_2\text{-Se}_6$  bonds ( $\text{Ag}_2\text{-Se}_1$  2.688(2) Å;  $\text{Se}_1\text{-Ag}_2\text{-Se}_1$  180.00(4)°). Alternatively, the  $[(\text{AgSe}_6\text{Ag})^{2+}]_n$  cation in **4** can be considered as built from polymeric  $[\text{Ag}_2\text{Se}_6^+]_n$

chains cross-linked by silver (Ag1) cations. The  $[\text{Ag}_2\text{Se}_6^+]_n$  chains are similar to those of  $\text{PdCl}_2\text{Se}_6$  in which  $\text{Se}_6$  is side-on coordinated to Pd (Figure S2.4.1 c).<sup>30</sup> Related cyclic  $\text{S}_8$ ,  $\text{Se}_6$ , and  $\text{Se}_7$  molecules usually coordinate side-on (as  $\text{S}_8$  to Ag in  $\text{AgS}_8^+$ ,  $\text{Se}_6$  in **1** and **2**) or end-on (as  $\text{Se}_6$  to Pd in  $\text{PdCl}_2\text{Se}_6$ ,  $\text{Se}_7$  to Re in  $\text{Re}_2\text{I}_2(\text{CO})_6\text{Se}_7$ <sup>31, 32</sup>). The infinite 2D architecture in  $[(\text{AgSe}_6\text{Ag})^{2+}]_n$  contains both side-on and end-on coordination modes. As far as we are aware, such a 2D structure constructed from simple components has not been previously observed. However a related pseudo 2D ribbon-type structure in  $[\text{Rh}_2(\text{O}_2\text{CCF}_3)_4(\text{S}_8)_2]_n$  has been reported by F. A. Cotton and his coworkers,<sup>33</sup> in which two infinite chains of  $[\text{Rh}_2(\text{O}_2\text{CCF}_3)_4(\text{S}_8)]_n$  are further connected by additional dirhodium tetra(trifluoroacetate) molecules lying between each pair of facing  $\text{S}_8$  rings (Figure S2.4.1 b).

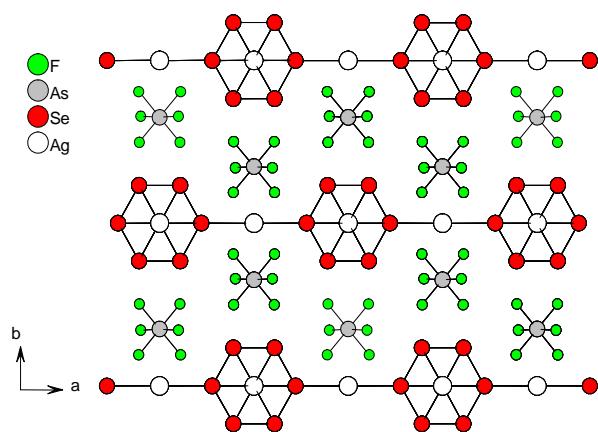

Figure S2.4.2: A portion of **4** projected down the *c*-axis.

The overall structure of **4** consists of sheets of  $(\text{AgSe}_6\text{Ag}^{2+})_n$  in the *ac* plane and separated by  $\text{AsF}_6^-$  anions, linked by fluorine-cation contacts (Figure S2.4.2). Each  $\text{AgSe}_6$  fragment is surrounded by six  $\text{AsF}_6^-$  anions. There are no Ag-F contacts to the  $(\text{Ag1Se}_6^+)_n$  chains in **4**. In contrast, the bridged Ag2 in **4** is involved in multiple fluorine contacts, two from each of the four adjacent anions (Ag2-F1 2.689(6) (x 4), Ag2-F2 3.053(6) (x 4) Å). Each selenium atom in **4** has four (Se1) or five (Se2) contacts to fluorine (S2.4.5) with Se-F distances similar to those in **3**. The bond distances in the  $\text{AsF}_6^-$  ( $C_2$ ) anion in **4** can be found in figure S2.4.7.



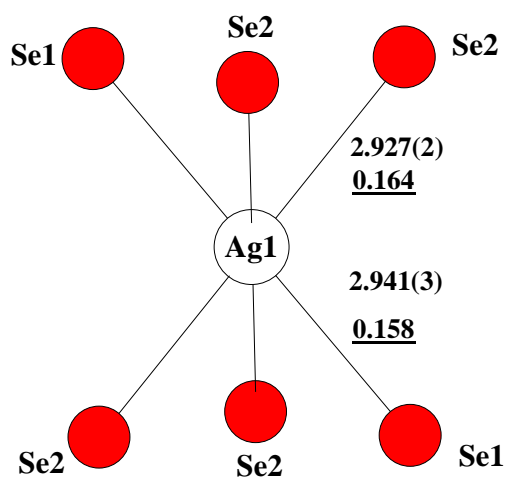

$$\Sigma(\text{Ag1-Se}) = 0.966$$

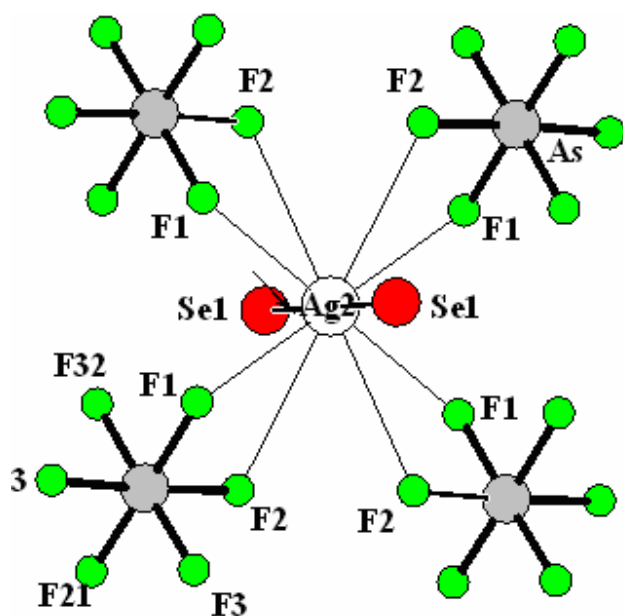

$$\begin{aligned} d(\text{Ag2} - \text{F1}) &= 2.689(6), s = 0.09 \\ d(\text{Ag2} - \text{F2}) &= 3.053(6), s = 0.034 \\ d(\text{Ag1} - \text{Se2}) &= 2.688(2), s = 0.31 \\ \Sigma_s(\text{Ag2} - \text{F/Se}) &= 1.116 \end{aligned}$$

Figure S2.4.3: Coordination spheres of Ag1 and Ag2 in 4

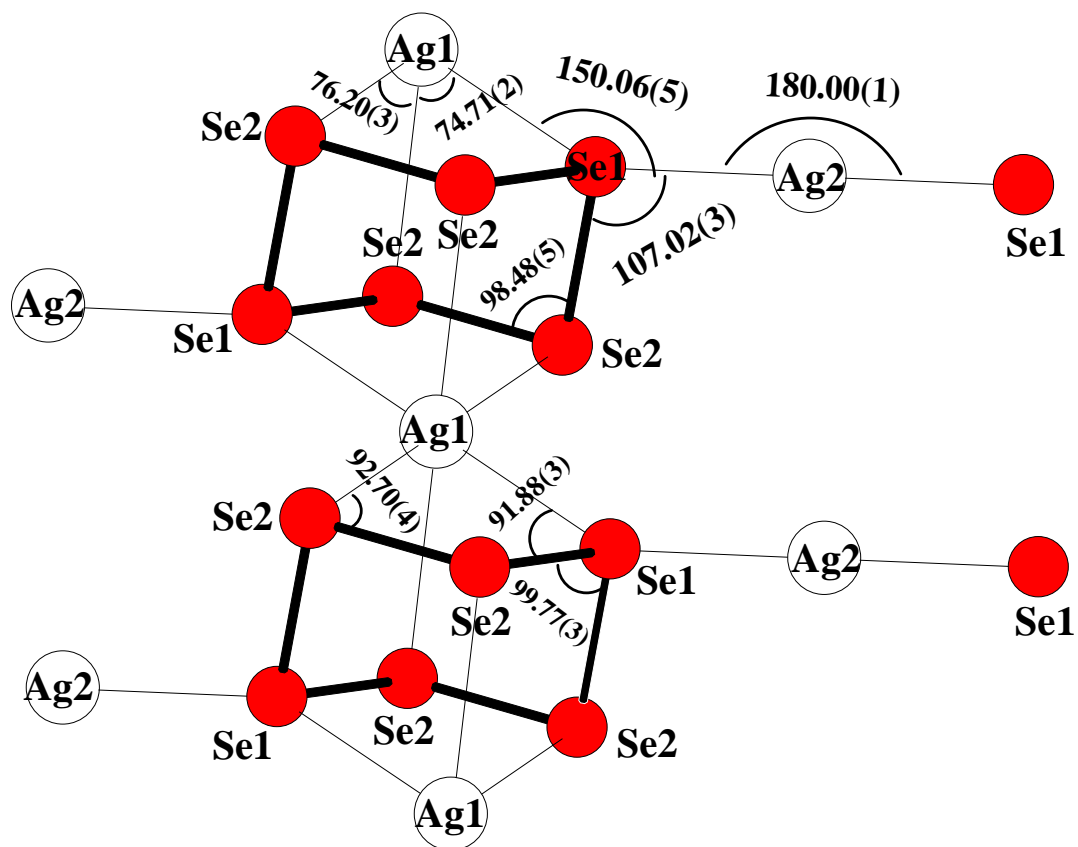

Figure S2.4.4: Bond angles in 4

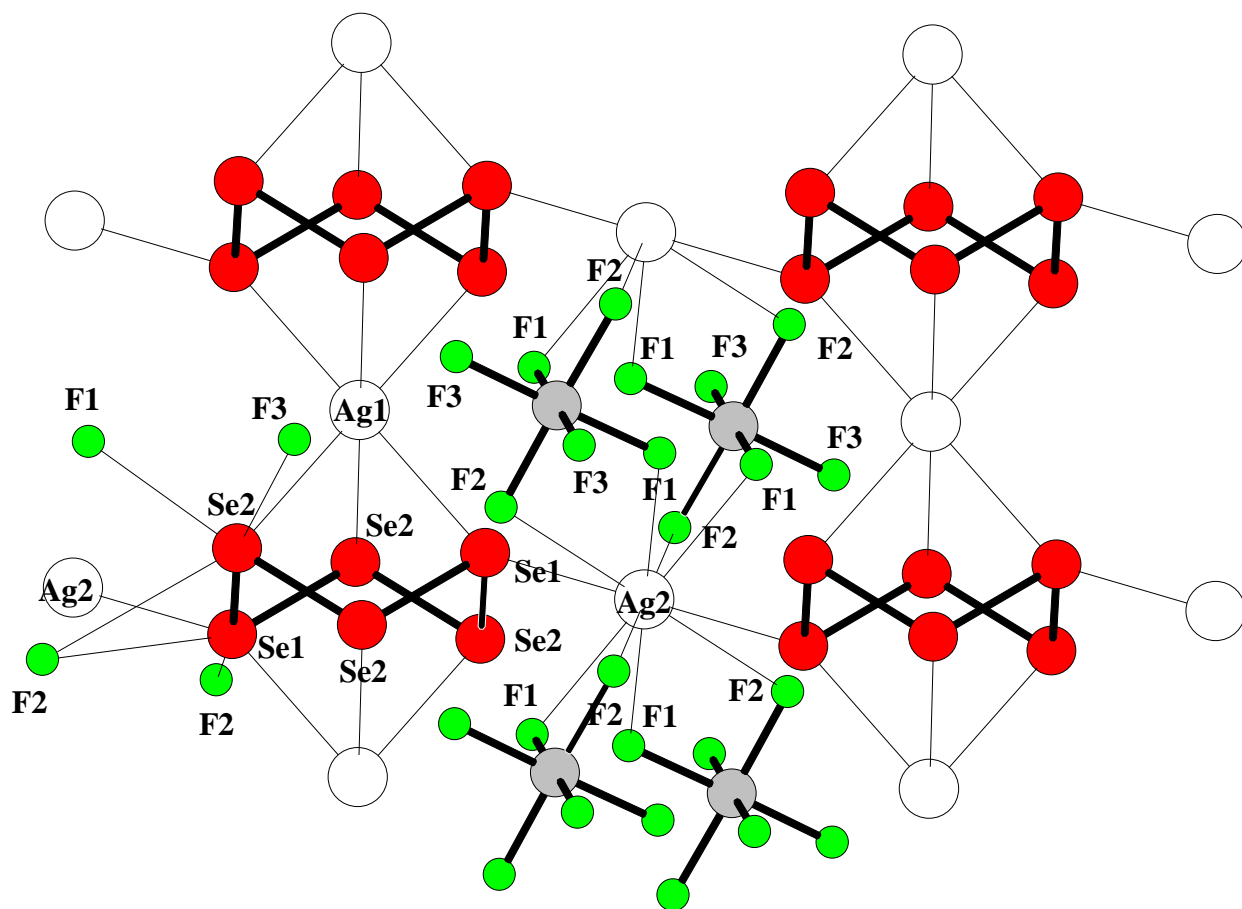

Figure S2.4.5: Cation-anion interactions in **4**

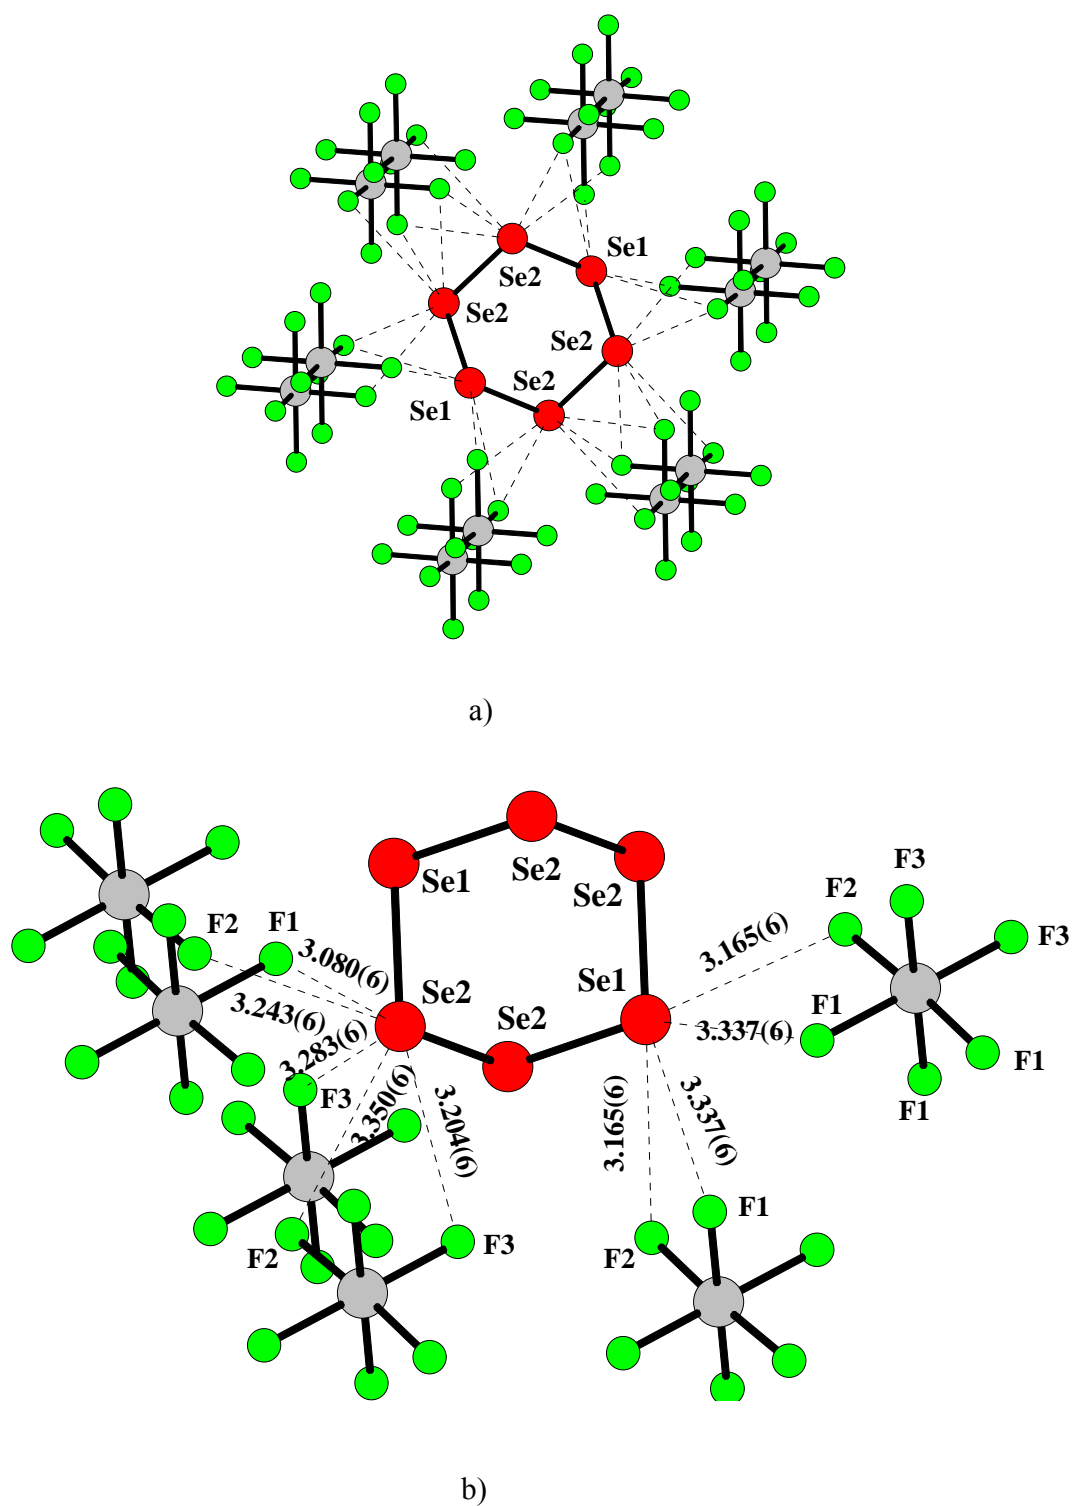

Figure S2.4.6: a) Se<sub>6</sub>-anion interactions in 4; b) Se1-F and Se2-F bond distances

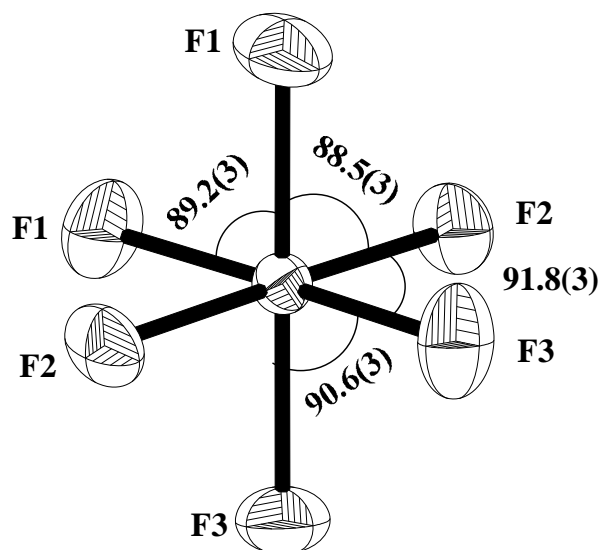

Figure S2.4.7: Coordination sphere of As in **4**. As-F1 = 1.721 (5), As-F2 = 1.712(5), As-F3 = 1.688 (6) Å. The thermal ellipsoids were drawn at the 50% probability level.

**Table S2.5:** Comparison of the structural parameters of Se<sub>6</sub> rings in several structures including 1-4 and A-E.

|                               | Se <sub>6</sub> (s) <sup>a</sup> | 1          | 2               | 3               | 4               | Cu <sub>2</sub> Br <sub>2</sub> Se <sub>6</sub> <sup>b</sup> | PdCl <sub>2</sub> Se <sub>6</sub> <sup>c</sup> | (Se <sub>6</sub> ) <sub>n</sub> n(SbF <sub>6</sub> ) <sup>d</sup> | Se <sub>6</sub> I <sub>2</sub> [AsF <sub>6</sub> ] <sub>2</sub> · 2 SO <sub>2</sub> <sup>d</sup> | Se <sub>6</sub> (Ph) <sub>2</sub> (AsF <sub>6</sub> ) <sub>2</sub> · SO <sub>2</sub> <sup>e</sup> | Rb <sub>3</sub> AsSe <sub>4</sub> · 2 Se <sub>6</sub> <sup>f</sup> |  |
|-------------------------------|----------------------------------|------------|-----------------|-----------------|-----------------|--------------------------------------------------------------|------------------------------------------------|-------------------------------------------------------------------|--------------------------------------------------------------------------------------------------|---------------------------------------------------------------------------------------------------|--------------------------------------------------------------------|--|
| Se-Se(Å)                      | 2.356 (3)                        | 2.346 (2)  | 2.339(3) (x2)   | 2.346 (2) (x 4) | 2.339 (3) (x 2) | 2.354(4) (x 4)                                               | 2.327 (6) (x 2)                                | 2.295 (4) (x 2)                                                   | 2.227 (2) (x 2)                                                                                  | 2.263 (4) (x 2)                                                                                   | 2.367 (2)                                                          |  |
| (in the Se <sub>6</sub> ring) |                                  |            | 2.368(3) (x2)   | 2.345 (2) (x 2) | 2.362 (2) (x 4) | 2.389 (3) (x 2)                                              | 2.377 (5) (x 2)                                | 2.362 (3) (x 2)                                                   | 2.468 (2) (x 2)                                                                                  | 2.383 (3) (x 2)                                                                                   |                                                                    |  |
|                               |                                  |            | 2.353(3) (x2)   |                 |                 |                                                              | 2.381 (5) (x 2)                                | 2.365 (4) (x 2)                                                   | 2.482 (2) (x 2)                                                                                  | 2.449 (4) (x 2)                                                                                   |                                                                    |  |
| Se-Se(ave., Å)                | 2.356 (3)                        | 2.346 (2)  | 2.353(3)        | 2.346 (2)       | 2.354 (3)       | 2.366 (4)                                                    | 2.362 (5)                                      | 2.341 (4)                                                         | 2.392 (2)                                                                                        | 2.365 (4)                                                                                         | 2.367 (2)                                                          |  |
| Se-Se-Se(o)                   | 101.1 (1)                        | 100.91 (7) | 100.16(10) (x2) | 99.61 (7) (x 2) | 98.48 (7) (x 4) | 99.06 (15) (x 2)                                             | 97.7 (1) (x 2)                                 | 103.3(1) (x 2)                                                    | 95.72(7) (x 2)                                                                                   | 99.61 (1) (x 2)                                                                                   | 102.93 (6)                                                         |  |
|                               |                                  |            | 100.55(10) (x2) | 99.68 (6) (x 2) | 99.76 (9) (x 2) | 100.85 (13) (x 4)                                            | 98.8 (2) (x 2)                                 | 103.7 (1) (x 2)                                                   | 103.48(7) (x 4)                                                                                  | 100.1 (1) (x 2)                                                                                   |                                                                    |  |
|                               |                                  |            | 99.75(10) (x2)  | 100.05 (6) (x2) |                 |                                                              | 107.7 (1) (x 2)                                | 104.3 (1) (x 2)                                                   |                                                                                                  | 102.4 (1) (x 2)                                                                                   |                                                                    |  |
| Se-Se-Se(ave., o)             | 101.1 (1)                        | 100.91 (7) | 100.15(10)      | 99.78(2)        | 98.91 (5)       | 100.25 (13)                                                  | 101.4 (1)                                      | 103.8 (1)                                                         | 100.89 (7)                                                                                       | 100.7 (1)                                                                                         | 102.93 (6)                                                         |  |
| Se-Se-Se-Se(ave., o)          | 76.2 (3)                         | 76.49 (1)  | 77.64(10)       | 78.11 (1)       | 79.78 (3)       | 78.5 (2)                                                     | 77.1 (2)                                       | 75.7 (2)                                                          | 74.6 (1)                                                                                         | 65.1 (1)                                                                                          | 73.3 (1)                                                           |  |

a) reference <sup>17</sup>; b) reference <sup>34</sup>; c) reference <sup>30</sup>; d) references <sup>35, 36</sup>; e) reference <sup>37</sup>; f) reference <sup>18</sup>;

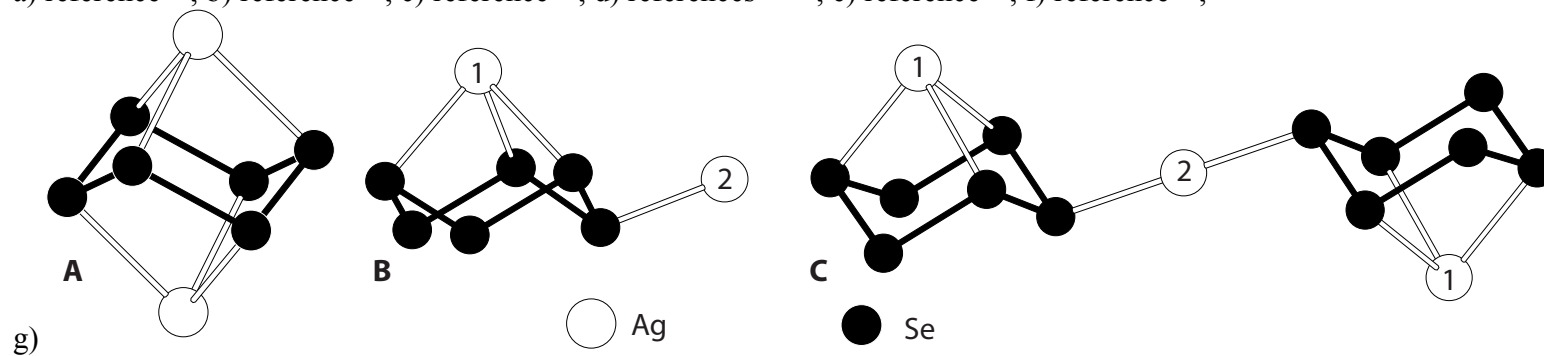

**Table S1.6:** Comparison of the structural parameters and the strengths [v.u.]<sup>43</sup> of the Ag-X (X = Se, O, and F) and Se-F contacts in [(OSO)AgSe<sub>6</sub>Ag(OSO)]<sup>2+</sup> (in **1**), [(OSO)<sub>2</sub>AgSe<sub>6</sub>Ag(OSO)<sub>2</sub>]<sup>2+</sup> (in **2a**) [Se<sub>6</sub>Ag<sup>+</sup>]<sub>n</sub> (in **3**) and [AgSe<sub>6</sub>Ag<sup>2+</sup>]<sub>n</sub> (in **4**) and the calculated structures **A-E** on pbe0/tzvpp level.

| Parameter                        | <b>1</b>                | <b>2</b>                 | <b>3</b>                   | <b>4</b>                  | <b>A</b> | <b>B</b>   | <b>C</b>   | <b>D</b>   | <b>E</b>   |
|----------------------------------|-------------------------|--------------------------|----------------------------|---------------------------|----------|------------|------------|------------|------------|
| d(Ag1-Se) [Å], s[v.u.]           | 2.885(2),<br>0.185(3 x) | 2.791(3),<br>0.235(1x)   | 3.0239(17),<br>0.127(2 x)  | 2.9273(18),<br>0.165(4 x) | 2.903    | 2.756      | 2.744 (2x) | 2.782 (2x) | 2.737 (2x) |
|                                  |                         | 2.893(3),<br>0.179(1x)   | 3.0636(16),<br>0.114 (2 x) | 2.941(3),<br>0.158(2 x)   |          | 2.929 (2x) | 2.946 (4x) | 3.009 (2x) | 3.046 (2x) |
|                                  |                         | 2.950(3),<br>0.153(1x)   | 2.8408(13),<br>0.208 (2 x) |                           |          |            |            | 3.045 (2x) | 3.295 (2x) |
| d(Ag1-Se) (Ave. [Å])             | 2.885                   | 2.878                    | 2.976                      | 2.932                     |          |            |            |            |            |
| Σs(Ag1-Se), s[v.u.]              | 0.555                   | 0.567                    | 0.898                      | 0.976                     |          | 2.575      | 2.581      |            |            |
| d(Ag2-Se) [Å],<br>s[v.u.](in 4)  |                         |                          |                            | 2.688(3),<br>0.314 (2 x)  |          |            |            |            |            |
| Σs(Ag2-Se), s[v.u.]              |                         |                          |                            | 0.628                     |          |            |            |            |            |
| d(Ag1-O) [Å], s [v.u.]           | 2.28(3),<br>0.310 (1x)  | 2.362(15),<br>0.247 (1x) |                            |                           |          |            |            | 2.258 (2x) | 2.358 (2x) |
|                                  |                         | 2.439(17),<br>0.199 (1x) |                            |                           |          |            |            |            | 2.489 (2x) |
| Σs(Ag1-O), s[v.u.]               |                         | 0.446                    |                            |                           |          |            |            |            |            |
| d(Ag1-O') [Å],<br>s[v.u.](in 2)  |                         | 3.139(1),<br>0.030 (1x)  |                            |                           |          |            |            |            |            |
| d(Ag1-F) [Å], s[v.u.]            | 2.988(4),<br>0.040(3 x) | 3.017(2),<br>0.021(1x)   | 3.095(1),<br>0.03 (1 x)    |                           |          |            |            |            |            |
| d(Ag2-F) [Å],<br>s[v.u.](in 4) a |                         |                          |                            | 2.689(6),<br>0.090(4 x)   |          |            |            |            |            |
|                                  |                         |                          |                            | 3.053(6),<br>0.034(4 x)   |          |            |            |            |            |
| d(Se-F)range [Å]                 | 3.170-<br>3.384         | 3.017                    | 2.912 – 3.218              | 3.080-3.350               |          |            |            |            |            |
| Σs(Ag1-F), s[v.u.]               | 0.120 (2<br>x)          |                          | 0.03                       |                           |          |            |            |            |            |
| Σs(Ag2-F), s[v.u.] (in<br>4)     |                         |                          |                            | 0.496                     |          |            |            |            |            |
| Σs(Ag1-X), s[v.u.]               | 0.985                   | 1.064                    | 0.928                      | 0.976                     |          |            |            |            |            |
| Σs(Ag2-X), s[v.u.] (in<br>4)     |                         |                          |                            | 1.124                     |          |            |            |            |            |

### S3 FT Raman Spectra of **4**

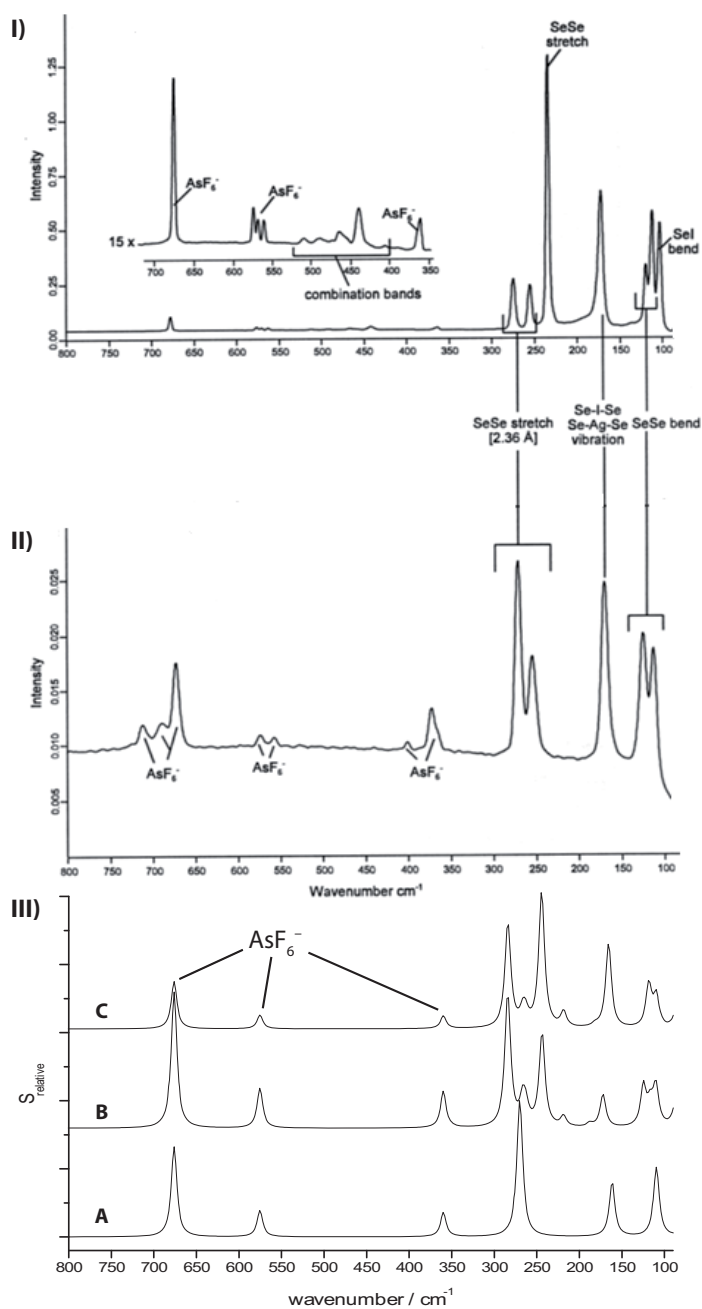

- I)  $(\text{Se}_6\text{I})_n[\text{AsF}_6]$  (exp. 150K, 5mm glass tube, 5000scans,  $2\text{cm}^{-1}$  resolution, 11mW laser beam)  
 II) **4** (exp. R.T., melting point capillaries, 1200 scans,  $4\text{cm}^{-1}$  resolution, 18 mW laser beam).  
 III) Calculated on the PBE0/tzvpp levels **A**, **B** and **C** denote fragments according to Table 1 in the main text.



## S4 Quantum chemical calculations

### S4.1 Energetics of the calculated compounds

| compound                                                                      | method | basisset | total energy<br>(Hartree) | ZPE<br>(Hartree) | total energy + ZPE<br>(Hartree) | total energy + ZPE<br>(kJ/mol) | enthalpy 298.15 K (kJ/mol) |
|-------------------------------------------------------------------------------|--------|----------|---------------------------|------------------|---------------------------------|--------------------------------|----------------------------|
| Ag <sup>+</sup>                                                               | bp     | svp      | -146.7596727              | 0                | -146.7596727                    | -385317.509                    | -385311.3115               |
| Ag <sup>+</sup>                                                               | pbe0   | tzvpp    | -146.6844728              | 0                | -146.6844728                    | -385120.0716                   | -385113.8741               |
| Ag <sub>2</sub> Se <sub>6</sub> <sup>2+</sup>                                 | bp     | svp      | -14703.00751              | 0.0054151        | -14703.0021                     | -38602730.83                   | -38602688.61               |
| Ag <sub>2</sub> Se <sub>6</sub> <sup>2+</sup>                                 | pbe0   | tzvpp    | -14701.16432              | 0.0061552        | -14701.15817                    | -38597889.59                   | -38597848.81               |
| Se <sub>6</sub> <sup>2+</sup> _boat                                           | bp     | svp      | -14408.68031              | 0.0048117        | -14408.6755                     | -37829976.36                   | -37829947.23               |
| Se <sub>6</sub> <sup>2+</sup> _boat                                           | pbe0   | tzvpp    | -14406.99728              | 0.0054946        | -14406.99179                    | -37825555.78                   | -37825528.04               |
| Se <sub>6</sub> <sup>2+</sup> _chair                                          | bp     | svp      | -14408.68116              | 0.0043771        | -14408.67679                    | -37829979.75                   | -37829949.82               |
| Se <sub>6</sub> <sup>2+</sup> _chair                                          | pbe0   | tzvpp    | -14406.98819              | 0.0050619        | -14406.98312                    | -37825533.04                   | -37825504.37               |
| Se <sub>8</sub> <sup>2+</sup>                                                 | bp     | svp      | -19211.87721              | 0.0064039        | -19211.8708                     | -50440765.25                   | -50440724.93               |
| Se <sub>8</sub> <sup>2+</sup>                                                 | pbe0   | tzvpp    | -19209.62835              | 0.0073466        | -19209.62101                    | -50434858.42                   | -50434819.94               |
| Se <sub>6</sub>                                                               | bp     | svp      | -14409.42699              | 0.0044854        | -14409.4225                     | -37831937.63                   | -37831907.96               |
| Se <sub>6</sub>                                                               | pbe0   | tzvpp    | -14407.74854              | 0.0052028        | -14407.74333                    | -37827528.97                   | -37827500.67               |
| Ag                                                                            | bp     | svp      | -147.0591299              | 0                | -147.0591299                    | -386103.7339                   | -386097.5365               |
| Ag                                                                            | pbe0   | tzvpp    | -146.930293               | 0                | -146.930293                     | -385765.4725                   | -385759.2751               |
| Ag <sub>2</sub> Se <sub>6</sub> (SO <sub>2</sub> ) <sub>2</sub> <sup>2+</sup> | bp     | svp      |                           |                  | 0                               | 0                              | 2.478968175                |
| Ag <sub>2</sub> Se <sub>6</sub> (SO <sub>2</sub> ) <sub>2</sub> <sup>2+</sup> | pbe0   | tzvpp    | -15798.05812              | 0.0223095        | -15798.03581                    | -41477741.76                   | -41477675.52               |
| SO <sub>2</sub>                                                               | bp     | svp      | -548.4196476              | 0.0064362        | -548.4132114                    | -1439858.843                   | -1439848.332               |
| SO <sub>2</sub>                                                               | pbe0   | tzvpp    | -548.4112333              | 0.0072201        | -548.4040132                    | -1439834.693                   | -1439824.71                |
| AgSO <sub>2</sub> <sup>+</sup>                                                | bp     | svp      | -695.2306906              | 0.0073497        | -695.2233409                    | -1825308.826                   | -1825293.234               |
| AgSO <sub>2</sub> <sup>+</sup>                                                | pbe0   | tzvpp    | -695.1352469              | 0.0081043        | -695.1271426                    | -1825056.257                   | -1825041.106               |
| Ag(SO <sub>2</sub> ) <sub>2</sub> <sup>+</sup>                                | bp     | svp      |                           |                  | 0                               | 0                              | 2.478968175                |
| Ag(SO <sub>2</sub> ) <sub>2</sub> <sup>+</sup>                                | pbe0   | tzvpp    | -1243.583969              | 0.0165106        | -1243.567458                    | -3264986.261                   | -3264959.061               |
| AgSe <sub>6</sub> SO <sub>2</sub> <sup>+</sup>                                | bp     | svp      |                           |                  | 0                               | 0                              | 2.478968175                |
| AgSe <sub>6</sub> SO <sub>2</sub> <sup>+</sup>                                | pbe0   | tzvpp    | -15102.95981              | 0.013837         | -15102.94597                    | -39652783.45                   | -39652736.34               |
| AgSe <sub>6</sub> <sup>+</sup>                                                | bp     | svp      | -14556.28883              | 0.0052026        | -14556.28363                    | -38217521.49                   | -38217486.08               |
| AgSe <sub>6</sub> <sup>+</sup>                                                | pbe0   | tzvpp    | -14554.52527              | 0.0058344        | -14554.51943                    | -38212889.61                   | -38212855.42               |
| Se <sub>8</sub>                                                               | bp     | svp      | -19212.58706              | 0.0062727        | -19212.58079                    | -50442629.33                   | -50442588.78               |
| Se <sub>8</sub>                                                               | pbe0   | tzvpp    | -19210.34421              | 0.0069981        | -19210.33721                    | -50436738.81                   | -50436699.63               |
| Ag <sub>2</sub> Se <sub>6</sub> (SO <sub>2</sub> ) <sub>4</sub> <sup>2+</sup> | pbe0   | tzvpp    | -16894.92007              | 0.0381615        | -16894.88191                    | -44357511.1                    | -44357423.83               |
| Ag <sub>2</sub>                                                               | pbe0   | tzvpp    | -293.9899614              | 0.0004115        | -293.9895499                    | -771869.5398                   | -771859.3212               |
| Ag(SO <sub>2</sub> ) <sub>3</sub> <sup>+</sup>                                | pbe0   | tzvpp    | -1792.013727              | 0.0241167        | -1791.98961                     | -4704868.578                   | -4704827.638               |
| AgSe <sub>6</sub> (SO <sub>2</sub> ) <sub>2</sub> <sup>+</sup>                | pbe0   | tzvpp    | -15651.38298              | 0.0216066        | -15651.36137                    | -41092648.03                   | -41092587.54               |

| compound                                                                      | free enthalpy<br>298.15 (kJ/mol) | freeh energy | freeh entropy | freeh chem.<br>pot. | diel+OC (hartree) | diel+OC (kJ/mol) | diel+Ocorrecte<br>d | free enthalpy<br>solvation |
|-------------------------------------------------------------------------------|----------------------------------|--------------|---------------|---------------------|-------------------|------------------|---------------------|----------------------------|
| Ag <sup>+</sup>                                                               | -385361.1439                     | 3.71845226   | 0.16713862    | -43.63496           | -0.108216374      | -284.12208       | -276.19208          | -385637.336                |
| Ag <sup>+</sup>                                                               | -385163.7065                     | 3            | 3             | -43.63496           | -0.108216543      | -284.122525      | -276.192525         | -385439.899                |
| Ag <sub>2</sub> Se <sub>6</sub> <sup>2+</sup>                                 | -38602858.47                     | 53.96        | 0.56969       | -113.41             | -0.247464417      | -649.7178078     | -641.7878078        | -38603500.25               |
| Ag <sub>2</sub> Se <sub>6</sub> <sup>2+</sup>                                 | -38598014.87                     | 54.46        | 0.55698       | -109.12             | -0.249228936      | -654.3505513     | -646.4205513        | -38598661.29               |
| Se <sub>6</sub> <sup>2+</sup> _boat                                           | -37830084.37                     | 39.28        | 0.45995       | -95.38              | -0.268634165      | -705.2989785     | -697.3689785        | -37830781.74               |
| Se <sub>6</sub> <sup>2+</sup> _boat                                           | -37825659.99                     | 39.69        | 0.44259       | -89.79              | -0.273260134      | -717.4444602     | -709.5144602        | -37826369.51               |
| Se <sub>6</sub> <sup>2+</sup> _chair                                          | -37830090.95                     | 38.95        | 0.47336       | -99.7               | -0.263132172      | -690.8534957     | -682.9234957        | -37830773.87               |
| Se <sub>6</sub> <sup>2+</sup> _chair                                          | -37825642.91                     | 39.48        | 0.46465       | -96.58              | -0.264423733      | -694.2444909     | -686.3144909        | -37826329.23               |
| Se <sub>8</sub> <sup>2+</sup>                                                 | -50440891.22                     | 54.66        | 0.55776       | -109.16             | -0.243323118      | -638.8448271     | -630.9148271        | -50441522.14               |
| Se <sub>8</sub> <sup>2+</sup>                                                 | -50434981.03                     | 55.29        | 0.54031       | -103.33             | -0.24660319       | -647.4566564     | -639.5266564        | -50435620.56               |
| Se <sub>6</sub>                                                               | -37832041.44                     | 38.96        | 0.44769       | -92.04              | -0.003928146      | -10.31334596     | -2.383345959        | -37832043.83               |
| Se <sub>6</sub>                                                               | -37827630.79                     | 39.48        | 0.4364        | -88.15              | -0.003957287      | -10.3898567      | -2.459856702        | -37827633.24               |
| Ag                                                                            | -386147.3689                     | 3.71845226   | 0.16713862    | -43.63496           | -3.464E-07        | -0.000909473     | 7.929090527         | -386139.4398               |
| Ag                                                                            | -385809.1075                     | 3            | 3             | -43.63496           | -0.000000649      | -0.001703949     | 7.928296051         | -385801.1792               |
| Ag <sub>2</sub> Se <sub>6</sub> (SO <sub>2</sub> ) <sub>2</sub> <sup>2+</sup> | 2.478968175                      |              |               |                     |                   | 0                | 7.93                | 7.93                       |
| Ag <sub>2</sub> Se <sub>6</sub> (SO <sub>2</sub> ) <sub>2</sub> <sup>2+</sup> | -41477941.53                     | 122.33       | 0.89221       | -141.2              | -0.222111782      | -583.1544667     | -575.2244667        | -41478516.75               |
| SO <sub>2</sub>                                                               | -1439922.831                     | 24.93        | 0.24987       | -47.09              | -0.006733579      | -17.67900981     | -9.749009813        | -1439932.58                |
| SO <sub>2</sub>                                                               | -1439898.765                     | 26.46        | 0.24838       | -45.11              | -0.007050361      | -18.5107225      | -10.5807225         | -1439909.34                |
| AgSO <sub>2</sub> <sup>+</sup>                                                | -1825391.206                     | 32.41        | 0.3286        | -63.09              | -0.091543741      | -240.3480839     | -232.4180839        | -1825623.631               |
| AgSO <sub>2</sub> <sup>+</sup>                                                | -1825139.338                     | 33.95        | 0.32947       | -61.8               | -0.092989886      | -244.1449377     | -236.2149377        | -1825375.55                |
| Ag(SO <sub>2</sub> ) <sub>2</sub> <sup>+</sup>                                | 2.478968175                      |              |               |                     |                   | 0                | 7.93                | 7.93                       |
| Ag(SO <sub>2</sub> ) <sub>2</sub> <sup>+</sup>                                | -3265100.73                      | 68.07        | 0.47516       | -71.12              | -0.081594424      | -214.2261524     | -206.2961524        | -3265307.026               |
| AgSe <sub>6</sub> SO <sub>2</sub> <sup>+</sup>                                | 2.478968175                      |              |               |                     |                   | 0                | 7.93                | 7.93                       |
| AgSe <sub>6</sub> SO <sub>2</sub> <sup>+</sup>                                | -39652934.3                      | 80.96        | 0.66397       | -114.53             | -0.067136694      | -176.2673853     | -168.3373853        | -39653102.64               |
| AgSe <sub>6</sub> <sup>+</sup>                                                | -38217636.6                      | 46.59        | 0.50482       | -101.44             | -0.0690293        | -181.2364227     | -173.3064227        | -38217809.9                |
| AgSe <sub>6</sub> <sup>+</sup>                                                | -38213003.1                      | 47.03        | 0.49533       | -98.18              | -0.071028649      | -186.4857128     | -178.5557128        | -38213181.66               |
| Se <sub>8</sub>                                                               | -50442751.71                     | 54.54        | 0.54649       | -105.91             | -0.003547455      | -9.313843869     | -1.383843869        | -50442753.09               |
| Se <sub>8</sub>                                                               | -50436860.09                     | 55.08        | 0.53821       | -102.9              | -0.003765823      | -9.88716746      | -1.95716746         | -50436862.04               |
| Ag <sub>2</sub> Se <sub>6</sub> (SO <sub>2</sub> ) <sub>4</sub> <sup>2+</sup> | -44357746.3                      | 184.98       | 1.08157       | -135.01             | -0.204647993      | -537.3032903     | -529.3732903        | -44358275.68               |
| Ag <sub>2</sub>                                                               | -771933.2147                     | 8.82         | 0.24784       | -62.59              | -0.005247062      | -13.77616086     | -5.846160861        | -771939.0563               |
| Ag(SO <sub>2</sub> ) <sub>3</sub> <sup>+</sup>                                | -4705022.822                     | 101.78       | 0.65465       | -90.92              | -0.076978564      | -202.1072128     | -194.1772128        | -4705216.994               |
| AgSe <sub>6</sub> (SO <sub>2</sub> ) <sub>2</sub> <sup>+</sup>                | -41092827.32                     | 114.74       | 0.80422       | -122.56             | -0.065766206      | -172.6691694     | -164.7391694        | -41092992.06               |



## S4.2 Born-Fajans-Haber cycles for estimation of lattice enthalpies

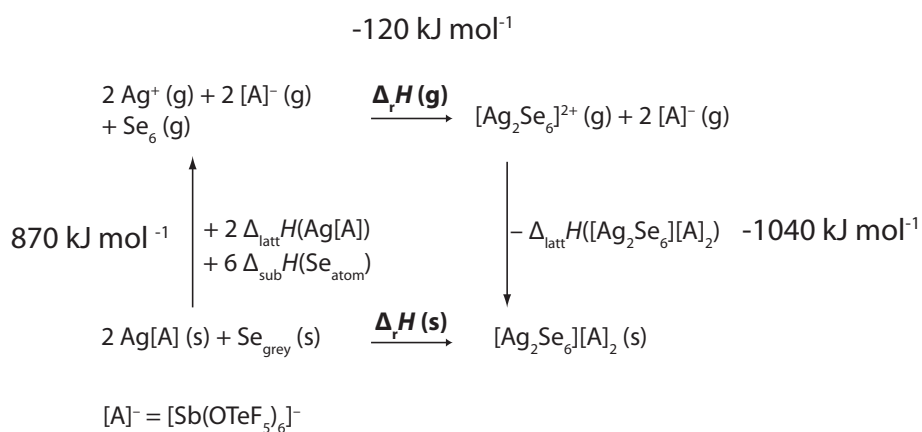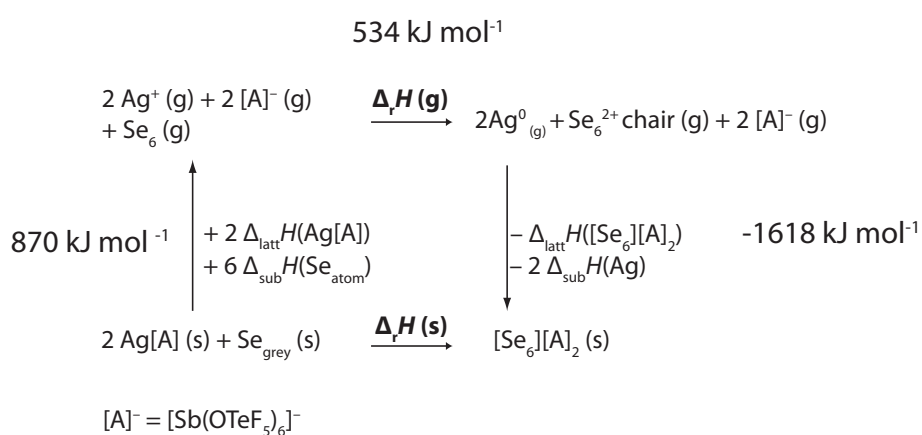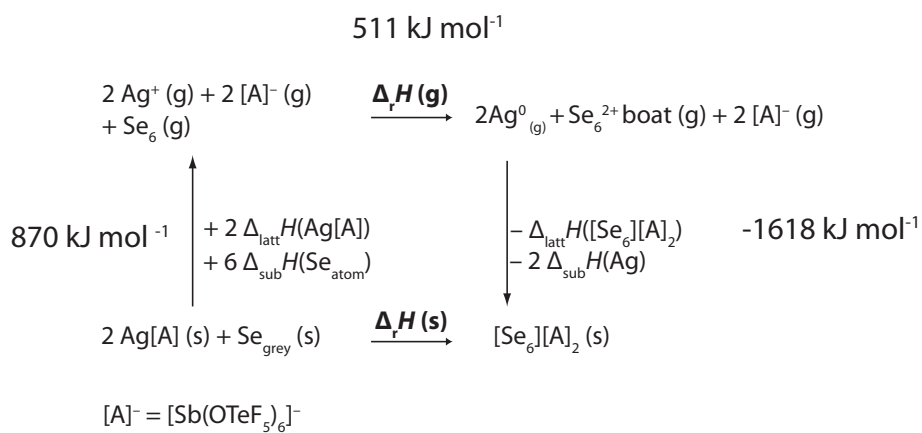

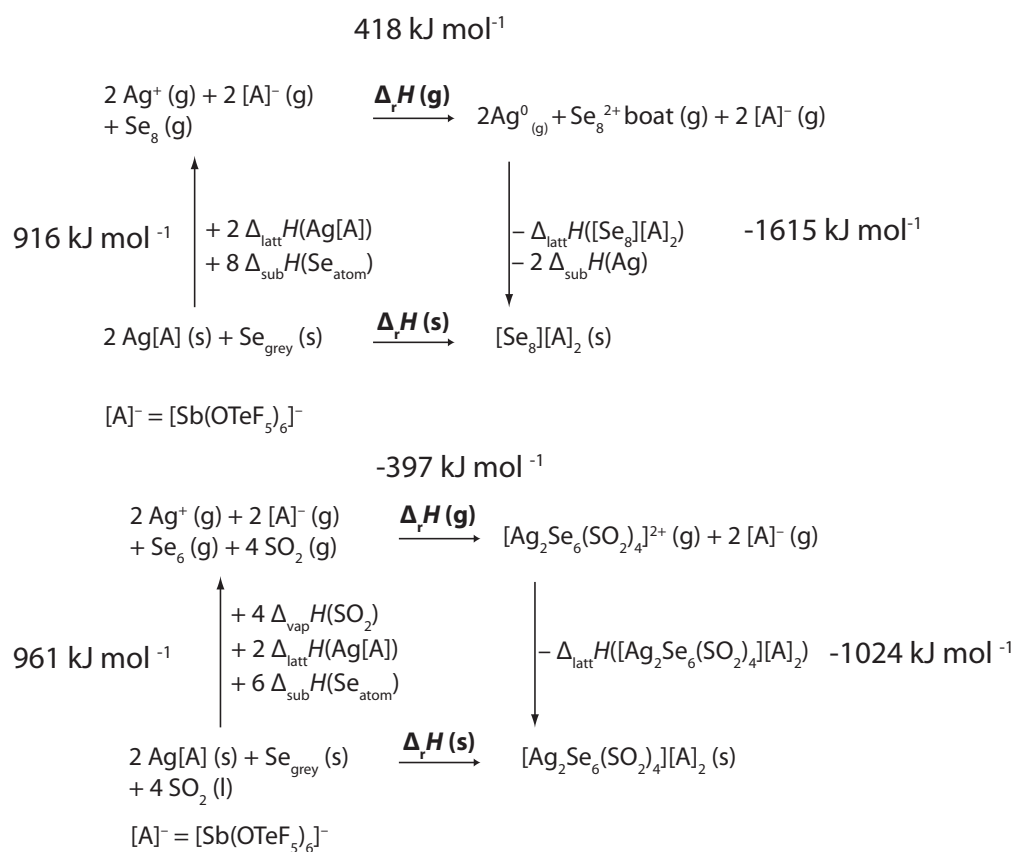

**Table S4.2.1:** Collected Volumes of Ions used.

| Ion                                                                        | Volume [nm <sup>3</sup> ] | Origin                                          |
|----------------------------------------------------------------------------|---------------------------|-------------------------------------------------|
| [Sb(OTeF <sub>5</sub> ) <sub>6</sub> ] <sup>-</sup>                        | 0.724                     | Reference <sup>38</sup>                         |
| [Ag <sub>2</sub> Se <sub>6</sub> ] <sup>2+</sup>                           | 0.255                     | Pbe0/tzvpp//cosmo                               |
| [(OSO)AgSe <sub>6</sub> Ag(OSO)] <sup>2+</sup>                             | 0.308                     | X-RAY                                           |
| [(OSO) <sub>2</sub> AgSe <sub>6</sub> Ag(OSO) <sub>2</sub> ] <sup>2+</sup> | 0.385                     | X-RAY                                           |
| Se <sub>6</sub> <sup>2+</sup> chair                                        | 0.196                     | Pbe0/tzvpp/cosmo                                |
| Se <sub>6</sub> <sup>2+</sup> boat                                         | 0.190                     | Pbe0/tzvpp/cosmo                                |
| Ag <sup>+</sup>                                                            | 0.006                     | Calcd. from Shannon r =<br>1.15 Å <sup>39</sup> |
| Se <sub>8</sub> <sup>2+</sup>                                              | 0.214                     | Reference <sup>40</sup>                         |

A scaling of the calculated volumes of compound Se<sub>6</sub><sup>2+</sup> according to reference<sup>41</sup> on the cosmo-pbe0/tzvpp level leads to a change in U<sub>pot</sub> of 0.4 kJ mol<sup>-1</sup> and therefore the volumes are used without scaling.

## S 4.3 Details of the Quantum Chemical Investigations

### S 4.3.1 Calculated Geometries and Spectra PBE0/TZVPP

ag2se6\_1\_pbe0tzvpp

```
-----  
$coord  
  3.44914832070948      1.99136671143657      0.99561803164237  se  
 -3.44914832070948      1.99136671143657      0.99561803164237  se  
 -3.44914832070948     -1.99136671143657     -0.99561803164237  se  
  3.44914832070948     -1.99136671143657     -0.99561803164237  se  
  0.0000000000000000      3.98273342287314     -0.99561803164237  se  
  0.0000000000000000     -3.98273342287314      0.99561803164237  se  
  0.0000000000000000      0.0000000000000000      4.76863270495494  ag  
  0.0000000000000000      0.0000000000000000     -4.76863270495494  ag
```

\$user-defined bonds

\$end

-----  
SCF and ZP-Energy

```
* zero point VIBRATIONAL energy :    0.0061552  Hartree  *  
*   SCF-energy                    : -14701.1643206          *  
*   SCF + E(vib0)                 : -14701.1581654          *
```

-----  
Vibrational Spectrum

| #  | mode | symmetry | wave number<br>cm**(-1) | IR intensity<br>km/mol | selection rules<br>IR | RAMAN |
|----|------|----------|-------------------------|------------------------|-----------------------|-------|
| #  |      |          |                         |                        |                       |       |
| 1  |      |          | 0.00                    | 0.00000                | -                     | -     |
| 2  |      |          | 0.00                    | 0.00000                | -                     | -     |
| 3  |      |          | 0.00                    | 0.00000                | -                     | -     |
| 4  |      |          | 0.00                    | 0.00000                | -                     | -     |
| 5  |      |          | 0.00                    | 0.00000                | -                     | -     |
| 6  |      |          | 0.00                    | 0.00000                | -                     | -     |
| 7  |      | eu       | 44.20                   | 0.54081                | YES                   | NO    |
| 8  |      | eu       | 44.20                   | 0.54081                | YES                   | NO    |
| 9  |      | eg       | 50.58                   | 0.00000                | NO                    | YES   |
| 10 |      | eg       | 50.58                   | 0.00000                | NO                    | YES   |
| 11 |      | alg      | 77.11                   | 0.00000                | NO                    | YES   |
| 12 |      | a2u      | 96.93                   | 10.34189               | YES                   | NO    |
| 13 |      | eu       | 102.17                  | 0.10450                | YES                   | NO    |
| 14 |      | eu       | 102.17                  | 0.10450                | YES                   | NO    |
| 15 |      | eg       | 109.52                  | 0.00000                | NO                    | YES   |
| 16 |      | eg       | 109.52                  | 0.00000                | NO                    | YES   |
| 17 |      | alg      | 161.60                  | 0.00000                | NO                    | YES   |
| 18 |      | a2u      | 178.18                  | 2.85600                | YES                   | NO    |
| 19 |      | alu      | 233.31                  | 0.00000                | NO                    | NO    |
| 20 |      | eu       | 267.60                  | 0.14950                | YES                   | NO    |
| 21 |      | eu       | 267.60                  | 0.14950                | YES                   | NO    |
| 22 |      | eg       | 268.16                  | 0.00000                | NO                    | YES   |
| 23 |      | eg       | 268.16                  | 0.00000                | NO                    | YES   |
| 24 |      | alg      | 270.25                  | 0.00000                | NO                    | YES   |

-----  
HOMO-LUMO Gap

```
Gap :                      +0.16797161 H =      +4.57074 eV
```

-----  
ag2se6\_2\_pbe0tzvpp

```
-----  
$coord  
  0.00053683796852      2.74767872767663     -1.73596186641559  se  
  3.47939030925524     -3.10235075264850     -1.99580348918949  se  
  0.00010657219379     -5.20061866840011     -0.18773876974280  se  
 -3.44999885732025      0.64588891946619      0.29578795762287  se  
  3.45021012610665      0.64570194230084      0.29674806033669  se
```

```

-3.47891921689773      -3.10218361441453      -1.99673220304740      se
-0.00006810122176      7.26280244113295      0.07899936093760      ag
-0.00090235305042      -1.87103311789480      3.81790780984209      ag
    
```

\$user-defined bonds  
\$end

-----  
 SCF and ZP-Energy

```

* zero point VIBRATIONAL energy :      0.0061177  Hartree  *
*   SCF-energy                    : -14701.1579982      *
*   SCF + E(vib0)                 : -14701.1518806      *
    
```

-----  
 Vibrational Spectrum

| #  | mode | symmetry | wave number<br>cm**(-1) | IR intensity<br>km/mol | selection rules |       |
|----|------|----------|-------------------------|------------------------|-----------------|-------|
| #  |      |          |                         |                        | IR              | RAMAN |
| 1  |      |          | 0.00                    | 0.00000                | -               | -     |
| 2  |      |          | 0.00                    | 0.00000                | -               | -     |
| 3  |      |          | 0.00                    | 0.00000                | -               | -     |
| 4  |      |          | 0.00                    | 0.00000                | -               | -     |
| 5  |      |          | 0.00                    | 0.00000                | -               | -     |
| 6  |      |          | 0.00                    | 0.00000                | -               | -     |
| 7  |      | a        | 27.85                   | 0.27970                | YES             | YES   |
| 8  |      | a        | 36.11                   | 0.19262                | YES             | YES   |
| 9  |      | a        | 48.54                   | 0.41026                | YES             | YES   |
| 10 |      | a        | 57.47                   | 1.57968                | YES             | YES   |
| 11 |      | a        | 72.32                   | 1.52061                | YES             | YES   |
| 12 |      | a        | 85.13                   | 0.00059                | YES             | YES   |
| 13 |      | a        | 88.69                   | 2.61293                | YES             | YES   |
| 14 |      | a        | 110.16                  | 0.34428                | YES             | YES   |
| 15 |      | a        | 116.83                  | 0.22368                | YES             | YES   |
| 16 |      | a        | 124.82                  | 1.51385                | YES             | YES   |
| 17 |      | a        | 172.34                  | 2.15631                | YES             | YES   |
| 18 |      | a        | 187.87                  | 2.42451                | YES             | YES   |
| 19 |      | a        | 218.67                  | 0.22241                | YES             | YES   |
| 20 |      | a        | 243.86                  | 3.94238                | YES             | YES   |
| 21 |      | a        | 262.67                  | 0.27184                | YES             | YES   |
| 22 |      | a        | 266.70                  | 0.11994                | YES             | YES   |
| 23 |      | a        | 281.10                  | 0.02470                | YES             | YES   |
| 24 |      | a        | 284.23                  | 0.35333                | YES             | YES   |

-----  
 HOMO-LUMO Gap

```

Gap :                      +0.14333275 H =      +3.90028 eV
    
```

-----  
 ag2se6\_3\_pbe0tzvpp

\$coord

```

-0.00003164526704      3.76196628175051      -1.46377977650626      se
 3.45857467147156      -1.99827159837028      -0.87801428146664      se
-0.00000880166699      -3.76197262361926      1.46378270337090      se
-3.45855801262634      1.99824300713226      0.87807578838537      se
 3.45855580628988      1.99828441048597      0.87802083158133      se
-3.45854239185286      -1.99825193213670      -0.87806784658176      se
 0.00000727257717      8.38894632953931      0.17429531959179      ag
 0.00000032085515      -8.38894453267594      -0.17430807000524      ag
    
```

\$user-defined bonds  
\$end

-----  
 SCF and ZP-Energy

```

* zero point VIBRATIONAL energy :      0.0059618  Hartree  *
*   SCF-energy                    : -14699.3088688      *
*   SCF + E(vib0)                 : -14699.3029069      *
    
```

-----  
 Vibrational Spectrum

| # | mode | symmetry | wave number<br>cm**(-1) | IR intensity<br>km/mol | selection rules |       |
|---|------|----------|-------------------------|------------------------|-----------------|-------|
| # |      |          |                         |                        | IR              | RAMAN |

|    |   |        |         |     |     |
|----|---|--------|---------|-----|-----|
| 1  |   | 0.00   | 0.00000 | -   | -   |
| 2  |   | 0.00   | 0.00000 | -   | -   |
| 3  |   | 0.00   | 0.00000 | -   | -   |
| 4  |   | 0.00   | 0.00000 | -   | -   |
| 5  |   | 0.00   | 0.00000 | -   | -   |
| 6  |   | 0.00   | 0.00000 | -   | -   |
| 7  | a | 23.01  | 2.92786 | YES | YES |
| 8  | a | 31.49  | 1.90845 | YES | YES |
| 9  | a | 42.12  | 0.00000 | YES | YES |
| 10 | a | 45.76  | 0.00000 | YES | YES |
| 11 | a | 71.16  | 0.00000 | YES | YES |
| 12 | a | 80.64  | 0.06075 | YES | YES |
| 13 | a | 81.43  | 5.04566 | YES | YES |
| 14 | a | 100.42 | 0.00000 | YES | YES |
| 15 | a | 119.92 | 5.07066 | YES | YES |
| 16 | a | 121.83 | 0.00000 | YES | YES |
| 17 | a | 182.17 | 0.00000 | YES | YES |
| 18 | a | 190.78 | 7.36530 | YES | YES |
| 19 | a | 206.50 | 1.01717 | YES | YES |
| 20 | a | 236.97 | 0.00000 | YES | YES |
| 21 | a | 250.34 | 4.89854 | YES | YES |
| 22 | a | 253.58 | 0.00000 | YES | YES |
| 23 | a | 286.48 | 0.59894 | YES | YES |
| 24 | a | 292.33 | 0.00000 | YES | YES |

HOMO-LUMO Gap

Gap : +0.13978354 H = +3.80371 eV

ag2se6\_so2\_2\_pbe0tzvpp

\$coord

|                   |                   |                   |    |
|-------------------|-------------------|-------------------|----|
| 2.36148485683856  | -3.16516710916646 | -0.90577257435874 | se |
| 1.91471553666679  | 3.62476567925215  | -0.16977755562468 | se |
| -2.36798835436629 | 3.17062502030217  | 0.92188538089128  | se |
| -1.92018425491558 | -3.62022968279511 | 0.18778292248267  | se |
| 2.27973971627730  | 0.55295369575575  | -3.34115776457780 | se |
| -2.28440832406103 | -0.54748205639367 | 3.35970714419186  | se |
| 3.35764314083208  | -0.44957971584814 | 3.55470015298042  | ag |
| -3.37630218880326 | 0.47214076008444  | -3.52337866367739 | ag |
| 8.26009866188325  | -4.02991522192597 | 6.92593539859888  | o  |
| 7.88138964965738  | -1.62976030706722 | 8.07008603400396  | s  |
| 5.97643417749256  | -0.01546277302005 | 6.90929619798684  | o  |
| -5.97360777443634 | 0.00796030870667  | -6.88433642401373 | o  |
| -7.85854716408321 | 1.60443496822175  | -8.10067365309668 | s  |
| -8.25046767898220 | 4.02471643389369  | -7.00429659578688 | o  |

\$user-defined bonds

\$end

SCF and ZP-Energy

\* zero point VIBRATIONAL energy : 0.0223001 Hartree \*

\* SCF-energy : -15798.0579488 \*

\* SCF + E(vib0) : -15798.0356487 \*

Vibrational Spectrum

| # | mode | symmetry | wave number<br>cm**(-1) | IR intensity<br>km/mol | selection rules<br>IR RAMAN |
|---|------|----------|-------------------------|------------------------|-----------------------------|
| 1 |      | a        | -6.05                   | 0.00000                | YES YES                     |
| 2 |      |          | 0.00                    | 0.00000                | - -                         |
| 3 |      |          | 0.00                    | 0.00000                | - -                         |
| 4 |      |          | 0.00                    | 0.00000                | - -                         |
| 5 |      |          | 0.00                    | 0.00000                | - -                         |
| 6 |      |          | 0.00                    | 0.00000                | - -                         |
| 7 |      |          | 0.00                    | 0.00000                | - -                         |
| 8 |      | a        | 6.33                    | 0.33640                | YES YES                     |



|    |   |         |           |     |     |
|----|---|---------|-----------|-----|-----|
| 9  | a | 10.96   | 0.08309   | YES | YES |
| 10 | a | 14.28   | 0.01475   | YES | YES |
| 11 | a | 18.80   | 1.19987   | YES | YES |
| 12 | a | 24.00   | 0.02722   | YES | YES |
| 13 | a | 25.89   | 1.39361   | YES | YES |
| 14 | a | 27.61   | 0.75242   | YES | YES |
| 15 | a | 32.72   | 0.00264   | YES | YES |
| 16 | a | 35.80   | 0.00186   | YES | YES |
| 17 | a | 41.30   | 0.01717   | YES | YES |
| 18 | a | 44.63   | 1.07858   | YES | YES |
| 19 | a | 75.36   | 0.00064   | YES | YES |
| 20 | a | 85.52   | 7.62148   | YES | YES |
| 21 | a | 95.56   | 0.54886   | YES | YES |
| 22 | a | 103.71  | 1.44957   | YES | YES |
| 23 | a | 107.33  | 0.00001   | YES | YES |
| 24 | a | 108.31  | 0.00001   | YES | YES |
| 25 | a | 156.32  | 0.00013   | YES | YES |
| 26 | a | 163.76  | 9.48712   | YES | YES |
| 27 | a | 164.85  | 13.94068  | YES | YES |
| 28 | a | 174.58  | 1.02532   | YES | YES |
| 29 | a | 216.94  | 27.42302  | YES | YES |
| 30 | a | 218.70  | 1.73225   | YES | YES |
| 31 | a | 236.73  | 0.03445   | YES | YES |
| 32 | a | 269.48  | 0.05068   | YES | YES |
| 33 | a | 270.02  | 0.00260   | YES | YES |
| 34 | a | 271.40  | 0.00009   | YES | YES |
| 35 | a | 273.86  | 0.00525   | YES | YES |
| 36 | a | 277.01  | 0.00001   | YES | YES |
| 37 | a | 543.23  | 77.11998  | YES | YES |
| 38 | a | 544.01  | 19.41765  | YES | YES |
| 39 | a | 1182.06 | 421.41932 | YES | YES |
| 40 | a | 1183.40 | 4.88638   | YES | YES |
| 41 | a | 1391.77 | 461.68956 | YES | YES |
| 42 | a | 1392.36 | 0.33185   | YES | YES |

-----  
 HOMO-LUMO Gap

Gap : +0.16325607 H = +4.44243 eV

-----  
 ag2se6\_so2\_2\_cosmoopt\_pbe0\_tzvpp

-----  
 \$coord

|                   |                   |                    |    |
|-------------------|-------------------|--------------------|----|
| 1.86160248160618  | 3.19866531435211  | -1.68194287420437  | se |
| 2.00686049913439  | -3.51404196669529 | -0.45799488229015  | se |
| -1.86506308099907 | -3.20071086221691 | 1.68114419301817   | se |
| -2.00981452720006 | 3.51212456011557  | 0.45833354944258   | se |
| 3.96562842291913  | 0.23693930949039  | 0.86410098948592   | se |
| -3.96868396261800 | -0.23889980901409 | -0.86394083596745  | se |
| -0.16308892677468 | -0.82733413209824 | -4.68001196172126  | ag |
| 0.16394553256154  | 0.83217191422887  | 4.67907344027462   | ag |
| 0.34348213283070  | 2.28582854574600  | -10.79126337312814 | o  |
| -0.11472207104714 | -0.34609433329655 | -11.14448299882417 | s  |
| -0.36445246540348 | -1.86337422630298 | -8.88061605441599  | o  |
| 0.35537044634356  | 1.86697974375897  | 8.88281297709035   | o  |
| 0.11342976140206  | 0.34642392807436  | 11.14519020542012  | s  |
| -0.32449424275519 | -2.28867798614208 | 10.78959762581974  | o  |

\$user-defined bonds

\$end

-----  
 SCF and ZP-Energy

-----  
 Vibrational Spectrum

| # | mode | symmetry | wave number<br>cm**(-1) | IR intensity<br>km/mol | selection rules<br>IR | RAMAN |
|---|------|----------|-------------------------|------------------------|-----------------------|-------|
| # | 1    |          | 0.00                    | 0.00000                | -                     | -     |

|    |   |         |           |     |     |
|----|---|---------|-----------|-----|-----|
| 2  |   | 0.00    | 0.00000   | -   | -   |
| 3  |   | 0.00    | 0.00000   | -   | -   |
| 4  |   | 0.00    | 0.00000   | -   | -   |
| 5  |   | 0.00    | 0.00000   | -   | -   |
| 6  |   | 0.00    | 0.00000   | -   | -   |
| 7  | a | 3.40    | 0.02717   | YES | YES |
| 8  | a | 4.80    | 0.01982   | YES | YES |
| 9  | a | 7.75    | 0.00296   | YES | YES |
| 10 | a | 9.79    | 0.41573   | YES | YES |
| 11 | a | 19.82   | 1.73323   | YES | YES |
| 12 | a | 23.20   | 2.15789   | YES | YES |
| 13 | a | 25.00   | 0.00302   | YES | YES |
| 14 | a | 28.41   | 0.03219   | YES | YES |
| 15 | a | 33.74   | 0.00072   | YES | YES |
| 16 | a | 35.82   | 0.00070   | YES | YES |
| 17 | a | 42.28   | 0.00011   | YES | YES |
| 18 | a | 45.90   | 1.15979   | YES | YES |
| 19 | a | 77.65   | 0.00314   | YES | YES |
| 20 | a | 85.18   | 7.40548   | YES | YES |
| 21 | a | 95.88   | 0.56218   | YES | YES |
| 22 | a | 106.87  | 1.42123   | YES | YES |
| 23 | a | 107.41  | 0.00038   | YES | YES |
| 24 | a | 107.99  | 0.00382   | YES | YES |
| 25 | a | 157.24  | 0.00016   | YES | YES |
| 26 | a | 162.28  | 5.80531   | YES | YES |
| 27 | a | 162.67  | 17.35211  | YES | YES |
| 28 | a | 174.75  | 0.96329   | YES | YES |
| 29 | a | 218.89  | 27.57086  | YES | YES |
| 30 | a | 220.50  | 0.73797   | YES | YES |
| 31 | a | 237.12  | 0.04162   | YES | YES |
| 32 | a | 269.40  | 0.05100   | YES | YES |
| 33 | a | 269.82  | 0.00571   | YES | YES |
| 34 | a | 271.52  | 0.00007   | YES | YES |
| 35 | a | 274.73  | 0.00582   | YES | YES |
| 36 | a | 278.32  | 0.00003   | YES | YES |
| 37 | a | 543.24  | 91.30463  | YES | YES |
| 38 | a | 543.72  | 3.69708   | YES | YES |
| 39 | a | 1181.28 | 432.82428 | YES | YES |
| 40 | a | 1182.63 | 1.15636   | YES | YES |
| 41 | a | 1391.54 | 461.14812 | YES | YES |
| 42 | a | 1392.20 | 9.03841   | YES | YES |

-----  
 HOMO-LUMO Gap

Gap : +0.14948494 H = +4.06769 eV

-----  
 ag2se6\_so2\_4\_pbe0\_tzvpp

-----  
 \$coord

|                   |                   |                   |    |
|-------------------|-------------------|-------------------|----|
| 9.68436526893912  | -4.92747525726106 | -0.74390346028693 | s  |
| 8.35229532731317  | 5.84911366646232  | 0.07836721313340  | s  |
| 8.47398500343425  | -2.61351473253212 | -1.58194274849897 | o  |
| 8.49109229084315  | -6.23840772587921 | 1.28007629356654  | o  |
| 8.39430344828057  | 3.14908826734467  | 0.48710778034535  | o  |
| 5.95963176241307  | 6.93015115890122  | -0.55149714936861 | o  |
| 1.52904447141169  | 0.10755668654391  | 3.74983871674576  | se |
| 1.12383513358135  | 3.16746448045698  | -2.31036641507338 | se |
| -0.30582032322738 | 3.66295512690186  | 1.83160569909455  | se |
| 5.13224100637098  | -0.21145908953699 | 0.04794438492229  | ag |
| -1.12102433056916 | -3.17687695554074 | 2.31845949058521  | se |
| -1.52566387421486 | -0.11724407765433 | -3.74413261322508 | se |
| -5.13176171850995 | 0.21577606447002  | -0.05429016953143 | ag |
| 0.30564500025488  | -3.67369932492713 | -1.82406233830470 | se |
| -8.46012611128538 | 2.65129598329077  | 1.54784407856776  | o  |
| -8.39571002512593 | -3.14400134264289 | -0.46846987803553 | o  |

|                   |                   |                   |   |
|-------------------|-------------------|-------------------|---|
| -9.68215758204089 | 4.95077751035687  | 0.68681458698494  | s |
| -8.36431407310235 | -5.84063436454799 | -0.03649405363596 | s |
| -8.49914914062949 | 6.24477480577682  | -1.35382402244844 | o |
| -5.97728700316467 | -6.92489865566237 | 0.60865378697991  | o |

\$end

-----  
 SCF and ZP-Energy  
 -----

Vibrational Spectrum

| #  | mode | symmetry | wave number<br>cm**(-1) | IR intensity<br>km/mol | selection rules |       |
|----|------|----------|-------------------------|------------------------|-----------------|-------|
| #  |      |          |                         |                        | IR              | RAMAN |
| 1  |      | a        | -6.75                   | 0.00000                | YES             | YES   |
| 2  |      | a        | -5.32                   | 0.00000                | YES             | YES   |
| 3  |      |          | 0.00                    | 0.00000                | -               | -     |
| 4  |      |          | 0.00                    | 0.00000                | -               | -     |
| 5  |      |          | 0.00                    | 0.00000                | -               | -     |
| 6  |      |          | 0.00                    | 0.00000                | -               | -     |
| 7  |      |          | 0.00                    | 0.00000                | -               | -     |
| 8  |      |          | 0.00                    | 0.00000                | -               | -     |
| 9  |      | a        | 7.69                    | 0.01896                | YES             | YES   |
| 10 |      | a        | 8.40                    | 0.07947                | YES             | YES   |
| 11 |      | a        | 12.72                   | 0.79760                | YES             | YES   |
| 12 |      | a        | 14.41                   | 0.01298                | YES             | YES   |
| 13 |      | a        | 14.87                   | 1.11760                | YES             | YES   |
| 14 |      | a        | 18.95                   | 0.61620                | YES             | YES   |
| 15 |      | a        | 22.07                   | 0.00131                | YES             | YES   |
| 16 |      | a        | 23.81                   | 0.00753                | YES             | YES   |
| 17 |      | a        | 24.72                   | 0.02411                | YES             | YES   |
| 18 |      | a        | 26.98                   | 1.31421                | YES             | YES   |
| 19 |      | a        | 31.98                   | 0.00067                | YES             | YES   |
| 20 |      | a        | 35.08                   | 0.00282                | YES             | YES   |
| 21 |      | a        | 37.66                   | 0.99368                | YES             | YES   |
| 22 |      | a        | 39.91                   | 0.00253                | YES             | YES   |
| 23 |      | a        | 44.72                   | 0.92320                | YES             | YES   |
| 24 |      | a        | 45.66                   | 0.14373                | YES             | YES   |
| 25 |      | a        | 55.99                   | 4.81138                | YES             | YES   |
| 26 |      | a        | 56.38                   | 0.00806                | YES             | YES   |
| 27 |      | a        | 77.97                   | 0.00625                | YES             | YES   |
| 28 |      | a        | 80.21                   | 3.80923                | YES             | YES   |
| 29 |      | a        | 93.67                   | 0.46077                | YES             | YES   |
| 30 |      | a        | 106.13                  | 0.00003                | YES             | YES   |
| 31 |      | a        | 110.35                  | 0.00500                | YES             | YES   |
| 32 |      | a        | 110.64                  | 0.04927                | YES             | YES   |
| 33 |      | a        | 128.25                  | 0.04638                | YES             | YES   |
| 34 |      | a        | 129.68                  | 8.61824                | YES             | YES   |
| 35 |      | a        | 135.27                  | 0.96990                | YES             | YES   |
| 36 |      | a        | 136.08                  | 20.12476               | YES             | YES   |
| 37 |      | a        | 150.19                  | 7.32821                | YES             | YES   |
| 38 |      | a        | 151.14                  | 20.16786               | YES             | YES   |
| 39 |      | a        | 156.32                  | 0.01320                | YES             | YES   |
| 40 |      | a        | 175.04                  | 0.18180                | YES             | YES   |
| 41 |      | a        | 188.40                  | 23.10176               | YES             | YES   |
| 42 |      | a        | 189.79                  | 0.43015                | YES             | YES   |
| 43 |      | a        | 235.65                  | 0.14891                | YES             | YES   |
| 44 |      | a        | 265.54                  | 0.00029                | YES             | YES   |
| 45 |      | a        | 268.09                  | 0.69892                | YES             | YES   |
| 46 |      | a        | 272.10                  | 0.00003                | YES             | YES   |
| 47 |      | a        | 278.45                  | 0.10916                | YES             | YES   |
| 48 |      | a        | 282.27                  | 0.00002                | YES             | YES   |
| 49 |      | a        | 542.17                  | 17.14494               | YES             | YES   |
| 50 |      | a        | 542.31                  | 43.74671               | YES             | YES   |
| 51 |      | a        | 542.96                  | 175.52744              | YES             | YES   |
| 52 |      | a        | 544.71                  | 0.20138                | YES             | YES   |
| 53 |      | a        | 1192.84                 | 332.75378              | YES             | YES   |
| 54 |      | a        | 1193.27                 | 3.15478                | YES             | YES   |

|    |   |         |           |     |     |
|----|---|---------|-----------|-----|-----|
| 55 | a | 1203.05 | 207.94678 | YES | YES |
| 56 | a | 1203.96 | 0.34454   | YES | YES |
| 57 | a | 1379.09 | 0.83313   | YES | YES |
| 58 | a | 1379.98 | 503.32832 | YES | YES |
| 59 | a | 1391.49 | 246.05795 | YES | YES |
| 60 | a | 1391.95 | 10.38030  | YES | YES |

HOMO-LUMO Gap

Gap : +0.16057755 H = +4.36954 eV

ag2se6\_so2\_4\_cosmoopt\_pbe0\_tzvpp

\$coord

|                   |                   |                   |    |
|-------------------|-------------------|-------------------|----|
| 9.47090287793709  | -4.95301278334396 | -0.65402065486008 | s  |
| 8.33052090101478  | 5.82635488579429  | 0.05931329404041  | s  |
| 8.39745076978998  | -2.59589795387131 | -1.51969944642088 | o  |
| 8.15022330537413  | -6.23896685709750 | 1.31500487928301  | o  |
| 8.37313513980486  | 3.11304809036595  | 0.31566290843826  | o  |
| 5.92191745589423  | 6.96736192043293  | -0.38697685987598 | o  |
| 1.41810540941003  | 0.39145080175970  | 3.75830762539387  | se |
| 1.03585701020313  | 3.10400162687322  | -2.44820947114104 | se |
| -0.56095288889031 | 3.72762992753064  | 1.62472204207591  | se |
| 4.92700932837524  | -0.05676696629517 | -0.16227284048538 | ag |
| -1.03300250852191 | -3.06766863723910 | 2.42594149118199  | se |
| -1.42271356063769 | -0.34944985868218 | -3.77976712420078 | se |
| -4.92412687534574 | 0.07988441660761  | 0.13956544264008  | ag |
| 0.56000964594452  | -3.68750544668444 | -1.65019206125818 | se |
| -8.37473146011004 | 2.55250259219370  | 1.64958723226697  | o  |
| -8.36616828048373 | -3.08961119166751 | -0.41531606449402 | o  |
| -9.47561416151056 | 4.90425066743062  | 0.80299996933143  | s  |
| -8.32128476266489 | -5.80512888000873 | -0.18279155468152 | s  |
| -8.20758120010281 | 6.18336159128270  | -1.20475528606002 | o  |
| -5.91553161450816 | -6.94509572106084 | 0.28062566134268  | o  |

\$user-defined bonds

\$end

SCF and ZP-Energy

Vibrational Spectrum

| #  | mode | symmetry | wave number<br>cm**(-1) | IR intensity<br>km/mol | selection rules<br>IR | RAMAN |
|----|------|----------|-------------------------|------------------------|-----------------------|-------|
| 1  |      | a        | -6.75                   | 0.00000                | YES                   | YES   |
| 2  |      | a        | -5.32                   | 0.00000                | YES                   | YES   |
| 3  |      |          | 0.00                    | 0.00000                | -                     | -     |
| 4  |      |          | 0.00                    | 0.00000                | -                     | -     |
| 5  |      |          | 0.00                    | 0.00000                | -                     | -     |
| 6  |      |          | 0.00                    | 0.00000                | -                     | -     |
| 7  |      |          | 0.00                    | 0.00000                | -                     | -     |
| 8  |      |          | 0.00                    | 0.00000                | -                     | -     |
| 9  |      | a        | 7.69                    | 0.01896                | YES                   | YES   |
| 10 |      | a        | 8.40                    | 0.07947                | YES                   | YES   |
| 11 |      | a        | 12.72                   | 0.79760                | YES                   | YES   |
| 12 |      | a        | 14.41                   | 0.01298                | YES                   | YES   |
| 13 |      | a        | 14.87                   | 1.11760                | YES                   | YES   |
| 14 |      | a        | 18.95                   | 0.61620                | YES                   | YES   |
| 15 |      | a        | 22.07                   | 0.00131                | YES                   | YES   |
| 16 |      | a        | 23.81                   | 0.00753                | YES                   | YES   |
| 17 |      | a        | 24.72                   | 0.02411                | YES                   | YES   |
| 18 |      | a        | 26.98                   | 1.31421                | YES                   | YES   |
| 19 |      | a        | 31.98                   | 0.00067                | YES                   | YES   |
| 20 |      | a        | 35.08                   | 0.00282                | YES                   | YES   |
| 21 |      | a        | 37.66                   | 0.99368                | YES                   | YES   |
| 22 |      | a        | 39.91                   | 0.00253                | YES                   | YES   |
| 23 |      | a        | 44.72                   | 0.92320                | YES                   | YES   |

|    |   |         |           |     |     |
|----|---|---------|-----------|-----|-----|
| 24 | a | 45.66   | 0.14373   | YES | YES |
| 25 | a | 55.99   | 4.81138   | YES | YES |
| 26 | a | 56.38   | 0.00806   | YES | YES |
| 27 | a | 77.97   | 0.00625   | YES | YES |
| 28 | a | 80.21   | 3.80923   | YES | YES |
| 29 | a | 93.67   | 0.46077   | YES | YES |
| 30 | a | 106.13  | 0.00003   | YES | YES |
| 31 | a | 110.35  | 0.00500   | YES | YES |
| 32 | a | 110.64  | 0.04927   | YES | YES |
| 33 | a | 128.25  | 0.04638   | YES | YES |
| 34 | a | 129.68  | 8.61824   | YES | YES |
| 35 | a | 135.27  | 0.96990   | YES | YES |
| 36 | a | 136.08  | 20.12476  | YES | YES |
| 37 | a | 150.19  | 7.32821   | YES | YES |
| 38 | a | 151.14  | 20.16786  | YES | YES |
| 39 | a | 156.32  | 0.01320   | YES | YES |
| 40 | a | 175.04  | 0.18180   | YES | YES |
| 41 | a | 188.40  | 23.10176  | YES | YES |
| 42 | a | 189.79  | 0.43015   | YES | YES |
| 43 | a | 235.65  | 0.14891   | YES | YES |
| 44 | a | 265.54  | 0.00029   | YES | YES |
| 45 | a | 268.09  | 0.69892   | YES | YES |
| 46 | a | 272.10  | 0.00003   | YES | YES |
| 47 | a | 278.45  | 0.10916   | YES | YES |
| 48 | a | 282.27  | 0.00002   | YES | YES |
| 49 | a | 542.17  | 17.14494  | YES | YES |
| 50 | a | 542.31  | 43.74671  | YES | YES |
| 51 | a | 542.96  | 175.52744 | YES | YES |
| 52 | a | 544.71  | 0.20138   | YES | YES |
| 53 | a | 1192.84 | 332.75378 | YES | YES |
| 54 | a | 1193.27 | 3.15478   | YES | YES |
| 55 | a | 1203.05 | 207.94678 | YES | YES |
| 56 | a | 1203.96 | 0.34454   | YES | YES |
| 57 | a | 1379.09 | 0.83313   | YES | YES |
| 58 | a | 1379.98 | 503.32832 | YES | YES |
| 59 | a | 1391.49 | 246.05795 | YES | YES |
| 60 | a | 1391.95 | 10.38030  | YES | YES |

-----  
 HOMO-LUMO Gap

Gap : +0.14895074 H = +4.05316 eV

-----  
 agse6pbe0\_tzvpp

-----  
 \$coord

|                   |                   |                   |    |
|-------------------|-------------------|-------------------|----|
| 2.01328216358389  | 3.48710699729953  | -1.62785968761695 | se |
| 2.01328216358389  | -3.48710699729953 | -1.62785968761695 | se |
| -1.96307521405401 | -3.40014600982073 | 0.32365572448021  | se |
| -1.96307521405401 | 3.40014600982073  | 0.32365572448021  | se |
| 3.92615042810803  | 0.00000000000000  | 0.32365572448021  | se |
| -4.02656432716783 | 0.00000000000000  | -1.62785968761695 | se |
| 0.00000000000000  | 0.00000000000000  | 3.91261188941022  | ag |

\$user-defined bonds

\$end

-----  
 SCF and ZP-Energy

|   |                               |   |                |         |   |
|---|-------------------------------|---|----------------|---------|---|
| * | zero point VIBRATIONAL energy | : | 0.0058344      | Hartree | * |
| * | SCF-energy                    | : | -14554.5252674 |         | * |
| * | SCF + E(vib0)                 | : | -14554.5194329 |         | * |

-----  
 Vibrational Spectrum

| # | mode | symmetry | wave number | IR intensity | selection rules |
|---|------|----------|-------------|--------------|-----------------|
| # |      |          | cm**(-1)    | km/mol       | IR RAMAN        |
|   | 1    |          | 0.00        | 0.00000      | - -             |
|   | 2    |          | 0.00        | 0.00000      | - -             |

|    |    |        |         |     |     |
|----|----|--------|---------|-----|-----|
| 3  |    | 0.00   | 0.00000 | -   | -   |
| 4  |    | 0.00   | 0.00000 | -   | -   |
| 5  |    | 0.00   | 0.00000 | -   | -   |
| 6  |    | 0.00   | 0.00000 | -   | -   |
| 7  | e  | 60.41  | 0.24934 | YES | YES |
| 8  | e  | 60.41  | 0.24934 | YES | YES |
| 9  | e  | 91.09  | 0.13449 | YES | YES |
| 10 | e  | 91.09  | 0.13449 | YES | YES |
| 11 | a1 | 94.36  | 3.00542 | YES | YES |
| 12 | e  | 119.17 | 0.13625 | YES | YES |
| 13 | e  | 119.17 | 0.13625 | YES | YES |
| 14 | a1 | 144.56 | 0.09556 | YES | YES |
| 15 | a1 | 184.34 | 1.32000 | YES | YES |
| 16 | a2 | 231.00 | 0.00000 | NO  | NO  |
| 17 | e  | 270.49 | 0.30476 | YES | YES |
| 18 | e  | 270.49 | 0.30476 | YES | YES |
| 19 | e  | 274.20 | 0.53963 | YES | YES |
| 20 | e  | 274.20 | 0.53963 | YES | YES |
| 21 | a1 | 276.05 | 0.10615 | YES | YES |

-----  
 HOMO-LUMO Gap

Gap : +0.16802401 H = +4.57217 eV

-----  
 agse6\_so2\_pbe0\_tzvpp

\$coord

|                   |                   |                   |    |
|-------------------|-------------------|-------------------|----|
| 1.80339887883071  | 3.29149901399081  | -5.15417399517500 | se |
| 2.04993259600390  | -3.59854900903202 | -4.19858138039336 | se |
| -1.82007991425296 | -3.33351233804769 | -2.06698481163009 | se |
| -2.06858224334775 | 3.35547143820866  | -3.01282077981598 | se |
| 3.90357428128925  | 0.17398455617372  | -2.81566573357424 | se |
| -4.08721953948624 | -0.33065062324477 | -4.39610310286127 | se |
| 0.18273133368015  | 0.56422689268098  | 1.02533736972357  | ag |
| 0.44783028099243  | 1.64660231918143  | 5.26207991983262  | o  |
| 0.12436210160159  | 0.41880104798441  | 7.68920879338538  | s  |
| -0.53594777531104 | -2.18787329789557 | 7.66770372050840  | o  |

\$user-defined bonds

\$end

-----  
 SCF and ZP-Energy

|                                 |   |                |         |   |
|---------------------------------|---|----------------|---------|---|
| * zero point VIBRATIONAL energy | : | 0.0138370      | Hartree | * |
| * SCF-energy                    | : | -15102.9598108 |         | * |
| * SCF + E(vib0)                 | : | -15102.9459738 |         | * |

-----  
 Vibrational Spectrum

| #  | mode | symmetry | wave number<br>cm**(-1) | IR intensity<br>km/mol | selection rules<br>IR | RAMAN |
|----|------|----------|-------------------------|------------------------|-----------------------|-------|
| 1  |      |          | 0.00                    | 0.00000                | -                     | -     |
| 2  |      |          | 0.00                    | 0.00000                | -                     | -     |
| 3  |      |          | 0.00                    | 0.00000                | -                     | -     |
| 4  |      |          | 0.00                    | 0.00000                | -                     | -     |
| 5  |      |          | 0.00                    | 0.00000                | -                     | -     |
| 6  |      |          | 0.00                    | 0.00000                | -                     | -     |
| 7  |      | a        | 2.41                    | 0.46834                | YES                   | YES   |
| 8  |      | a        | 16.46                   | 0.12507                | YES                   | YES   |
| 9  |      | a        | 22.56                   | 0.71472                | YES                   | YES   |
| 10 |      | a        | 42.97                   | 0.39951                | YES                   | YES   |
| 11 |      | a        | 50.14                   | 0.25577                | YES                   | YES   |
| 12 |      | a        | 51.57                   | 0.21557                | YES                   | YES   |
| 13 |      | a        | 88.59                   | 3.14477                | YES                   | YES   |
| 14 |      | a        | 89.89                   | 0.36421                | YES                   | YES   |
| 15 |      | a        | 90.64                   | 0.38555                | YES                   | YES   |
| 16 |      | a        | 113.57                  | 0.49475                | YES                   | YES   |
| 17 |      | a        | 113.91                  | 0.09361                | YES                   | YES   |

|    |   |         |           |     |     |
|----|---|---------|-----------|-----|-----|
| 18 | a | 142.70  | 9.51544   | YES | YES |
| 19 | a | 143.07  | 0.11495   | YES | YES |
| 20 | a | 173.80  | 1.20581   | YES | YES |
| 21 | a | 189.92  | 11.56070  | YES | YES |
| 22 | a | 233.20  | 0.00055   | YES | YES |
| 23 | a | 271.11  | 0.17720   | YES | YES |
| 24 | a | 271.69  | 0.18794   | YES | YES |
| 25 | a | 276.14  | 0.69834   | YES | YES |
| 26 | a | 276.58  | 0.71243   | YES | YES |
| 27 | a | 278.96  | 0.21090   | YES | YES |
| 28 | a | 539.11  | 41.98620  | YES | YES |
| 29 | a | 1196.60 | 135.98132 | YES | YES |
| 30 | a | 1398.12 | 248.16900 | YES | YES |

-----  
 HOMO-LUMO Gap

Gap : +0.13271419 H = +3.61134 eV  
 -----

agse6\_so2\_2\_pbe0\_tzvpp  
 -----

\$coord

|                   |                   |                   |    |
|-------------------|-------------------|-------------------|----|
| -0.06104590979782 | 1.53581483177638  | 5.04921048920667  | o  |
| 0.27347039162383  | -0.03065217476318 | 7.25415071656391  | s  |
| 0.62189109906828  | -2.67609060826551 | 6.85818016525284  | o  |
| -0.30319223868376 | 0.65465819763408  | 0.30707658533112  | ag |
| -0.83266840761124 | -0.88439278456520 | -5.07638656749611 | se |
| 3.50966029541405  | -0.26242130546455 | -5.57839800189195 | se |
| 4.73193780285011  | -0.01522240946225 | -1.33031188014851 | se |
| 4.56331585002662  | -4.21993672967150 | 0.05219604721831  | se |
| 0.17662918244117  | -4.71837070877825 | 0.38766561965246  | se |
| -1.11829009189377 | -5.11021440003723 | -3.82487391773583 | se |
| -3.17003475731896 | 4.21628940823359  | 0.66038335197030  | o  |
| -4.41687567183140 | 5.92956084524331  | -1.06223941532993 | s  |
| -3.97479754428702 | 5.58097783812030  | -3.69665319259320 | o  |

\$user-defined bonds

\$end  
 -----

SCF and ZP-Energy

\* zero point VIBRATIONAL energy : 0.0216066 Hartree \*  
 \* SCF-energy : -15651.3829782 \*  
 \* SCF + E(vib0) : -15651.3613717 \*

-----  
 Vibrational Spectrum

| #  | mode | symmetry | wave number<br>cm**(-1) | IR intensity<br>km/mol | selection rules<br>IR | RAMAN |
|----|------|----------|-------------------------|------------------------|-----------------------|-------|
| #  |      |          |                         |                        |                       |       |
| 1  |      |          | 0.00                    | 0.00000                | -                     | -     |
| 2  |      |          | 0.00                    | 0.00000                | -                     | -     |
| 3  |      |          | 0.00                    | 0.00000                | -                     | -     |
| 4  |      |          | 0.00                    | 0.00000                | -                     | -     |
| 5  |      |          | 0.00                    | 0.00000                | -                     | -     |
| 6  |      |          | 0.00                    | 0.00000                | -                     | -     |
| 7  |      | a        | 3.73                    | 0.01302                | YES                   | YES   |
| 8  |      | a        | 12.06                   | 0.11974                | YES                   | YES   |
| 9  |      | a        | 16.64                   | 0.07378                | YES                   | YES   |
| 10 |      | a        | 19.26                   | 0.00888                | YES                   | YES   |
| 11 |      | a        | 27.55                   | 1.34353                | YES                   | YES   |
| 12 |      | a        | 29.12                   | 0.29447                | YES                   | YES   |
| 13 |      | a        | 36.62                   | 0.08091                | YES                   | YES   |
| 14 |      | a        | 49.22                   | 1.72618                | YES                   | YES   |
| 15 |      | a        | 50.89                   | 0.44674                | YES                   | YES   |
| 16 |      | a        | 52.75                   | 1.89392                | YES                   | YES   |
| 17 |      | a        | 83.99                   | 0.82652                | YES                   | YES   |
| 18 |      | a        | 86.59                   | 0.36338                | YES                   | YES   |
| 19 |      | a        | 89.97                   | 0.31064                | YES                   | YES   |
| 20 |      | a        | 105.20                  | 1.61897                | YES                   | YES   |

|    |   |         |           |     |     |
|----|---|---------|-----------|-----|-----|
| 21 | a | 107.96  | 5.41632   | YES | YES |
| 22 | a | 113.20  | 1.74201   | YES | YES |
| 23 | a | 117.26  | 2.87596   | YES | YES |
| 24 | a | 120.46  | 9.29559   | YES | YES |
| 25 | a | 141.16  | 1.52757   | YES | YES |
| 26 | a | 153.73  | 9.10607   | YES | YES |
| 27 | a | 177.85  | 2.41408   | YES | YES |
| 28 | a | 234.16  | 0.00563   | YES | YES |
| 29 | a | 270.81  | 0.05853   | YES | YES |
| 30 | a | 272.90  | 0.14298   | YES | YES |
| 31 | a | 276.59  | 0.80229   | YES | YES |
| 32 | a | 277.87  | 0.84601   | YES | YES |
| 33 | a | 280.91  | 0.11164   | YES | YES |
| 34 | a | 537.64  | 24.96011  | YES | YES |
| 35 | a | 539.52  | 81.85859  | YES | YES |
| 36 | a | 1201.27 | 115.59533 | YES | YES |
| 37 | a | 1207.04 | 86.57893  | YES | YES |
| 38 | a | 1391.56 | 350.23577 | YES | YES |
| 39 | a | 1398.72 | 27.20642  | YES | YES |

-----  
 HOMO-LUMO Gap

Gap : +0.13179158 H = +3.58623 eV

-----  
 agso2\_pbe0tzvpp

\$coord

|                   |                   |                    |    |
|-------------------|-------------------|--------------------|----|
| -1.43255933352981 | -4.00751052065689 | 0.0000000000000000 | ag |
| -1.60753309381384 | 0.19966551419585  | 0.0000000000000000 | o  |
| 0.22627838872478  | 2.25904516569991  | 0.0000000000000000 | s  |
| 2.81381403861883  | 1.54879984076113  | 0.0000000000000000 | o  |

\$user-defined bonds

\$end

-----  
 SCF and ZP-Energy

|                                 |   |              |         |   |
|---------------------------------|---|--------------|---------|---|
| * zero point VIBRATIONAL energy | : | 0.0081043    | Hartree | * |
| * SCF-energy                    | : | -695.1352469 |         | * |
| * SCF + E(vib0)                 | : | -695.1271426 |         | * |

-----  
 Vibrational Spectrum

| # mode | symmetry | wave number | IR intensity | selection rules |       |
|--------|----------|-------------|--------------|-----------------|-------|
| #      |          | cm**(-1)    | km/mol       | IR              | RAMAN |
| 1      |          | 0.00        | 0.00000      | -               | -     |
| 2      |          | 0.00        | 0.00000      | -               | -     |
| 3      |          | 0.00        | 0.00000      | -               | -     |
| 4      |          | 0.00        | 0.00000      | -               | -     |
| 5      |          | 0.00        | 0.00000      | -               | -     |
| 6      |          | 0.00        | 0.00000      | -               | -     |
| 7      | a'       | 46.14       | 2.88456      | YES             | YES   |
| 8      | a''      | 162.22      | 18.52103     | YES             | YES   |
| 9      | a'       | 231.83      | 5.49873      | YES             | YES   |
| 10     | a'       | 541.86      | 33.13113     | YES             | YES   |
| 11     | a'       | 1180.54     | 152.32553    | YES             | YES   |
| 12     | a'       | 1394.77     | 211.18907    | YES             | YES   |

-----  
 HOMO-LUMO Gap

Gap : +0.22676672 H = +6.17064 eV

-----  
 agso2\_2\_pbe0tzvpp

\$coord

|                   |                   |                   |    |
|-------------------|-------------------|-------------------|----|
| -0.00008206301681 | 0.00004058509554  | -0.02633267716026 | ag |
| -0.08515135540008 | 4.13078934633031  | -0.02795411944608 | o  |
| 0.08512754055248  | -4.13070414864994 | -0.02795415771249 | o  |



```
1.78171252490920      6.15525404946446      0.00065929210001  s
-1.78164237209782     -6.15525599965467     0.00065916391595  s
4.36136595433189      5.41645769371946      0.04046116492838  o
-4.36133022927887     -5.41658152630515     0.04046133337450  o
```

\$user-defined bonds  
\$end

-----  
SCF and ZP-Energy

```
* zero point VIBRATIONAL energy :      0.0165106  Hartree  *
*   SCF-energy                    :    -1243.5839686          *
*   SCF + E(vib0)                 :    -1243.5674579          *
```

-----  
Vibrational Spectrum

| #  | mode | symmetry | wave number<br>cm**(-1) | IR intensity<br>km/mol | selection rules |       |
|----|------|----------|-------------------------|------------------------|-----------------|-------|
| #  |      |          |                         |                        | IR              | RAMAN |
| 1  |      |          | 0.00                    | 0.00000                | -               | -     |
| 2  |      |          | 0.00                    | 0.00000                | -               | -     |
| 3  |      |          | 0.00                    | 0.00000                | -               | -     |
| 4  |      |          | 0.00                    | 0.00000                | -               | -     |
| 5  |      |          | 0.00                    | 0.00000                | -               | -     |
| 6  |      |          | 0.00                    | 0.00000                | -               | -     |
| 7  |      | a        | 3.29                    | 0.41052                | YES             | YES   |
| 8  |      | a        | 23.88                   | 0.84170                | YES             | YES   |
| 9  |      | a        | 42.53                   | 2.82568                | YES             | YES   |
| 10 |      | a        | 46.26                   | 0.00969                | YES             | YES   |
| 11 |      | a        | 72.50                   | 3.49235                | YES             | YES   |
| 12 |      | a        | 155.00                  | 0.00788                | YES             | YES   |
| 13 |      | a        | 172.68                  | 29.84483               | YES             | YES   |
| 14 |      | a        | 203.16                  | 0.00015                | YES             | YES   |
| 15 |      | a        | 279.67                  | 7.27616                | YES             | YES   |
| 16 |      | a        | 541.50                  | 0.00214                | YES             | YES   |
| 17 |      | a        | 543.70                  | 70.04177               | YES             | YES   |
| 18 |      | a        | 1184.23                 | 305.77856              | YES             | YES   |
| 19 |      | a        | 1184.63                 | 0.01250                | YES             | YES   |
| 20 |      | a        | 1396.56                 | 446.40954              | YES             | YES   |
| 21 |      | a        | 1397.74                 | 0.08186                | YES             | YES   |

-----  
HOMO-LUMO Gap

```
Gap :                      +0.19773699 H =      +5.38070 eV
```

-----  
agso2\_3\_pbe0tzvpp  
-----

\$coord

```
0.00774060494933      -0.01142921107023      0.88732222863560  ag
3.84561429677453      -2.13587696385104      1.02696639660071  o
-0.08332628317468      4.37729097573029      1.03328519793023  o
-3.76659893498988      -2.25315756343891      1.03711579700945  o
4.70472339803557      -4.54680535298459      0.04576747710416  s
-6.27868079904135      -1.77848611878512      0.04875393546817  s
1.56380651669424      6.33405123178844      0.04792504479485  s
2.92871663353396      -5.98654004247566      -1.37052707638780  o
-6.61846030020348      0.47515850896264      -1.37919139260188  o
3.69646486742177      5.52579453612418      -1.37741760855353  o
```

\$user-defined bonds  
\$end

-----  
SCF and ZP-Energy

```
* zero point VIBRATIONAL energy :      0.0241167  Hartree  *
*   SCF-energy                    :    -1792.0137269          *
*   SCF + E(vib0)                 :    -1791.9896102          *
```

-----  
Vibrational Spectrum

| # | mode | symmetry | wave number<br>cm**(-1) | IR intensity<br>km/mol | selection rules |       |
|---|------|----------|-------------------------|------------------------|-----------------|-------|
| # |      |          |                         |                        | IR              | RAMAN |

|    |   |         |           |     |     |
|----|---|---------|-----------|-----|-----|
| 1  |   | 0.00    | 0.00000   | -   | -   |
| 2  |   | 0.00    | 0.00000   | -   | -   |
| 3  |   | 0.00    | 0.00000   | -   | -   |
| 4  |   | 0.00    | 0.00000   | -   | -   |
| 5  |   | 0.00    | 0.00000   | -   | -   |
| 6  |   | 0.00    | 0.00000   | -   | -   |
| 7  | a | 6.31    | 0.02624   | YES | YES |
| 8  | a | 6.42    | 0.02861   | YES | YES |
| 9  | a | 10.27   | 0.11972   | YES | YES |
| 10 | a | 10.56   | 0.06688   | YES | YES |
| 11 | a | 11.25   | 0.10341   | YES | YES |
| 12 | a | 32.31   | 2.97875   | YES | YES |
| 13 | a | 43.18   | 0.03129   | YES | YES |
| 14 | a | 44.09   | 2.66431   | YES | YES |
| 15 | a | 44.23   | 2.68397   | YES | YES |
| 16 | a | 139.91  | 8.68954   | YES | YES |
| 17 | a | 140.14  | 8.77128   | YES | YES |
| 18 | a | 148.43  | 27.48237  | YES | YES |
| 19 | a | 178.96  | 0.10971   | YES | YES |
| 20 | a | 185.65  | 8.22272   | YES | YES |
| 21 | a | 186.76  | 8.32365   | YES | YES |
| 22 | a | 540.86  | 58.97852  | YES | YES |
| 23 | a | 540.94  | 59.42589  | YES | YES |
| 24 | a | 543.18  | 4.04592   | YES | YES |
| 25 | a | 1193.40 | 174.95926 | YES | YES |
| 26 | a | 1193.43 | 173.38537 | YES | YES |
| 27 | a | 1199.50 | 8.09388   | YES | YES |
| 28 | a | 1394.17 | 266.40357 | YES | YES |
| 29 | a | 1394.25 | 267.47234 | YES | YES |
| 30 | a | 1397.81 | 155.60470 | YES | YES |

-----  
 HOMO-LUMO Gap

Gap : +0.20448138 H = +5.56422 eV  
 -----

so2\_pbe0\_tzvpp  
 -----

\$coord

|                    |                    |                   |   |
|--------------------|--------------------|-------------------|---|
| 0.0000000000000000 | 0.0000000000000000 | -0.91674937271946 | s |
| -2.32850100837618  | 0.0000000000000000 | 0.45837468635970  | o |
| 2.32850100837618   | 0.0000000000000000 | 0.45837468635970  | o |

\$user-defined bonds

\$end  
 -----

SCF and ZP-Energy

|                                 |   |              |         |   |
|---------------------------------|---|--------------|---------|---|
| * zero point VIBRATIONAL energy | : | 0.0072201    | Hartree | * |
| * SCF-energy                    | : | -548.4112333 |         | * |
| * SCF + E(vib0)                 | : | -548.4040132 |         | * |

-----  
 Vibrational Spectrum

| # | mode | symmetry | wave number<br>cm**(-1) | IR intensity<br>km/mol | selection rules |       |
|---|------|----------|-------------------------|------------------------|-----------------|-------|
| # |      |          |                         |                        | IR              | RAMAN |
| 1 |      |          | 0.00                    | 0.00000                | -               | -     |
| 2 |      |          | 0.00                    | 0.00000                | -               | -     |
| 3 |      |          | 0.00                    | 0.00000                | -               | -     |
| 4 |      |          | 0.00                    | 0.00000                | -               | -     |
| 5 |      |          | 0.00                    | 0.00000                | -               | -     |
| 6 |      |          | 0.00                    | 0.00000                | -               | -     |
| 7 |      | a1       | 532.09                  | 30.55076               | YES             | YES   |
| 8 |      | a1       | 1217.06                 | 32.97101               | YES             | YES   |
| 9 |      | b1       | 1420.11                 | 220.72602              | YES             | YES   |

-----  
 HOMO-LUMO Gap

Gap : +0.22678592 H = +6.17116 eV  
 -----

se6\_2+\_boat\_pbe0tzvpp

```
-----  
$coord  
-2.08221682044209      2.41981630320981      -1.35707560692137   se  
-2.08231422255380      -2.41973970896652      -1.35706292766456   se  
 2.28174536557824      3.12965223531603      -0.77770573455479   se  
 2.28162190848369      -3.12974639124949      -0.77769213219229   se  
-3.40907836846912      0.00007350336271      2.09154079719617   se  
 3.01024213740299      -0.00005594167254      2.17799560413685   se
```

```
$user-defined bonds  
$end  
-----
```

```
SCF and ZP-Energy  
* zero point VIBRATIONAL energy :      0.0054946   Hartree   *  
* SCF-energy                       : -14406.9972798   *  
* SCF + E(vib0)                   : -14406.9917852   *
```

```
-----  
Vibrational Spectrum  
# mode      symmetry      wave number      IR intensity      selection rules  
#           cm**(-1)      km/mol           IR      RAMAN  
 1           0.00           0.00000          -      -  
 2           0.00           0.00000          -      -  
 3           0.00           0.00000          -      -  
 4           0.00           0.00000          -      -  
 5           0.00           0.00000          -      -  
 6           0.00           0.00000          -      -  
 7           a           87.02           1.89721          YES     YES  
 8           a           92.43           0.06403          YES     YES  
 9           a           115.21          0.49189          YES     YES  
10           a           145.24          1.17915          YES     YES  
11           a           152.38          0.22014          YES     YES  
12           a           165.28          0.15566          YES     YES  
13           a           210.19          0.56141          YES     YES  
14           a           246.44          1.35956          YES     YES  
15           a           262.99          0.25753          YES     YES  
16           a           285.93          0.22544          YES     YES  
17           a           315.53          0.13340          YES     YES  
18           a           333.20          0.64506          YES     YES
```

```
-----  
HOMO-LUMO Gap  
Gap :                      +0.11861008 H =      +3.22755 eV  
-----
```

se6\_2+\_chair\_pbe0tzvpp

```
-----  
$coord  
 3.63125846781012      -2.09690436516911      -0.57850219319444   se  
-3.63128719386722      -2.09695808210255      -0.57796592067783   se  
-3.63136729103701      2.09691461683495       0.57829888570805   se  
 3.63133416385932      2.09685792867280       0.57883455263395   se  
 0.00003110978762      -4.19586195682670       0.57817666040822   se  
 0.00003074344714      4.19595185859061       -0.57884198487799   se
```

```
$user-defined bonds  
$end  
-----
```

```
SCF and ZP-Energy  
* zero point VIBRATIONAL energy :      0.0050619   Hartree   *  
* SCF-energy                       : -14406.9881864   *  
* SCF + E(vib0)                   : -14406.9831245   *
```

```
-----  
Vibrational Spectrum  
# mode      symmetry      wave number      IR intensity      selection rules  
#           cm**(-1)      km/mol           IR      RAMAN  
 1           0.00           0.00000          -      -
```

|    |   |        |         |     |     |
|----|---|--------|---------|-----|-----|
| 2  |   | 0.00   | 0.00000 | -   | -   |
| 3  |   | 0.00   | 0.00000 | -   | -   |
| 4  |   | 0.00   | 0.00000 | -   | -   |
| 5  |   | 0.00   | 0.00000 | -   | -   |
| 6  |   | 0.00   | 0.00000 | -   | -   |
| 7  | a | 34.12  | 2.86780 | YES | YES |
| 8  | a | 35.55  | 2.86474 | YES | YES |
| 9  | a | 106.36 | 0.00000 | YES | YES |
| 10 | a | 106.38 | 0.00000 | YES | YES |
| 11 | a | 125.54 | 0.00000 | YES | YES |
| 12 | a | 190.95 | 0.44787 | YES | YES |
| 13 | a | 237.64 | 0.00030 | YES | YES |
| 14 | a | 252.70 | 0.00000 | YES | YES |
| 15 | a | 273.86 | 0.28381 | YES | YES |
| 16 | a | 275.55 | 0.28451 | YES | YES |
| 17 | a | 290.65 | 0.00000 | YES | YES |
| 18 | a | 292.63 | 0.00000 | YES | YES |

HOMO-LUMO Gap

Gap : +0.09032298 H = +2.45781 eV

se8\_2+\_pbe0tzvpp

\$coord

|                   |                   |                   |    |
|-------------------|-------------------|-------------------|----|
| -2.14657692974305 | -0.12357711468802 | -2.77215000467083 | se |
| 1.28317746386817  | -2.83205419907150 | -3.13118703230046 | se |
| -0.41741026823280 | 3.89845519206863  | -3.18641627981269 | se |
| -0.04493003904956 | -5.62225495537990 | 0.00000000000000  | se |
| 1.28317746386817  | -2.83205419907150 | 3.13118703230046  | se |
| -2.14657692974305 | -0.12357711468802 | 2.77215000467083  | se |
| -0.41741026823280 | 3.89845519206863  | 3.18641627981269  | se |
| 2.60654950726488  | 3.73660719876167  | 0.00000000000000  | se |

\$user-defined bonds

\$end

SCF and ZP-Energy

|                                 |   |                |         |   |
|---------------------------------|---|----------------|---------|---|
| * zero point VIBRATIONAL energy | : | 0.0073466      | Hartree | * |
| * SCF-energy                    | : | -19209.6283545 |         | * |
| * SCF + E(vib0)                 | : | -19209.6210079 |         | * |

Vibrational Spectrum

| #  | mode | symmetry | wave number<br>cm**(-1) | IR intensity<br>km/mol | selection rules<br>IR | RAMAN |
|----|------|----------|-------------------------|------------------------|-----------------------|-------|
| 1  |      |          | 0.00                    | 0.00000                | -                     | -     |
| 2  |      |          | 0.00                    | 0.00000                | -                     | -     |
| 3  |      |          | 0.00                    | 0.00000                | -                     | -     |
| 4  |      |          | 0.00                    | 0.00000                | -                     | -     |
| 5  |      |          | 0.00                    | 0.00000                | -                     | -     |
| 6  |      |          | 0.00                    | 0.00000                | -                     | -     |
| 7  |      | a"       | 45.04                   | 0.20520                | YES                   | YES   |
| 8  |      | a'       | 55.84                   | 0.56366                | YES                   | YES   |
| 9  |      | a'       | 83.00                   | 0.11519                | YES                   | YES   |
| 10 |      | a"       | 88.61                   | 0.00173                | YES                   | YES   |
| 11 |      | a'       | 98.16                   | 4.94348                | YES                   | YES   |
| 12 |      | a"       | 99.17                   | 0.00282                | YES                   | YES   |
| 13 |      | a'       | 115.59                  | 0.17507                | YES                   | YES   |
| 14 |      | a'       | 129.37                  | 0.14750                | YES                   | YES   |
| 15 |      | a"       | 152.37                  | 0.14071                | YES                   | YES   |
| 16 |      | a'       | 152.52                  | 0.08123                | YES                   | YES   |
| 17 |      | a"       | 217.31                  | 0.09758                | YES                   | YES   |
| 18 |      | a"       | 241.81                  | 0.00444                | YES                   | YES   |
| 19 |      | a'       | 265.91                  | 1.94916                | YES                   | YES   |
| 20 |      | a"       | 282.10                  | 0.06179                | YES                   | YES   |
| 21 |      | a'       | 283.57                  | 0.43466                | YES                   | YES   |

|    |     |        |         |     |     |
|----|-----|--------|---------|-----|-----|
| 22 | a'' | 300.75 | 0.31113 | YES | YES |
| 23 | a'  | 300.95 | 0.00003 | YES | YES |
| 24 | a'  | 312.69 | 0.13104 | YES | YES |

HOMO-LUMO Gap

Gap : +0.09721376 H = +2.64532 eV

se8\_pbe0tzvpp

\$coord

|                   |                   |                   |    |
|-------------------|-------------------|-------------------|----|
| 1.91200403889871  | 4.61598608202144  | 1.08598787782985  | se |
| 1.91200403889871  | -4.61598608202144 | -1.08598787782985 | se |
| -4.61598608202144 | 1.91200403889871  | 1.08598787782985  | se |
| -4.61598608202144 | -1.91200403889871 | -1.08598787782985 | se |
| -1.91200403889871 | 4.61598608202144  | -1.08598787782985 | se |
| 4.61598608202144  | -1.91200403889871 | 1.08598787782985  | se |
| 4.61598608202144  | 1.91200403889871  | -1.08598787782985 | se |
| -1.91200403889871 | -4.61598608202144 | 1.08598787782985  | se |

\$user-defined bonds

\$end

SCF and ZP-Energy

\* zero point VIBRATIONAL energy : 0.0069981 Hartree \*

\* SCF-energy : -19210.3442091 \*

\* SCF + E(vib0) : -19210.3372110 \*

Vibrational Spectrum

| # mode # | symmetry | wave number<br>cm**(-1) | IR intensity<br>km/mol | selection rules<br>IR RAMAN |
|----------|----------|-------------------------|------------------------|-----------------------------|
| 1        |          | 0.00                    | 0.00000                | - -                         |
| 2        |          | 0.00                    | 0.00000                | - -                         |
| 3        |          | 0.00                    | 0.00000                | - -                         |
| 4        |          | 0.00                    | 0.00000                | - -                         |
| 5        |          | 0.00                    | 0.00000                | - -                         |
| 6        |          | 0.00                    | 0.00000                | - -                         |
| 7        | e2       | 36.90                   | 0.00000                | NO YES                      |
| 8        | e2       | 36.90                   | 0.00000                | NO YES                      |
| 9        | e2       | 74.17                   | 0.00000                | NO YES                      |
| 10       | e2       | 74.17                   | 0.00000                | NO YES                      |
| 11       | e1       | 96.58                   | 1.18162                | YES NO                      |
| 12       | e1       | 96.58                   | 1.18162                | YES NO                      |
| 13       | a1       | 109.95                  | 0.00000                | NO YES                      |
| 14       | b2       | 119.14                  | 0.50378                | YES NO                      |
| 15       | e3       | 124.32                  | 0.00000                | NO YES                      |
| 16       | e3       | 124.32                  | 0.00000                | NO YES                      |
| 17       | b1       | 252.41                  | 0.00000                | NO NO                       |
| 18       | e3       | 263.69                  | 0.00000                | NO YES                      |
| 19       | e3       | 263.69                  | 0.00000                | NO YES                      |
| 20       | e1       | 278.81                  | 1.71304                | YES NO                      |
| 21       | e1       | 278.81                  | 1.71304                | YES NO                      |
| 22       | a1       | 279.42                  | 0.00000                | NO YES                      |
| 23       | e2       | 280.97                  | 0.00000                | NO YES                      |
| 24       | e2       | 280.97                  | 0.00000                | NO YES                      |

HOMO-LUMO Gap

Gap : +0.16541460 H = +4.50116 eV

se6\_pbe0tzvpp

\$coord

|                   |                   |                   |    |
|-------------------|-------------------|-------------------|----|
| 3.41596475639717  | -1.97220817164818 | -0.99031463448427 | se |
| -3.41596475639716 | -1.97220817164818 | -0.99031463448427 | se |
| -3.41596475639716 | 1.97220817164818  | 0.99031463448427  | se |

```

3.41596475639717      1.97220817164818      0.99031463448427      se
0.0000000000000000    -3.94441634329635      0.99031463448427      se
0.0000000000000000    3.94441634329635      -0.99031463448427      se
    
```

\$end

-----  
 SCF and ZP-Energy

```

* zero point VIBRATIONAL energy :      0.0052028  Hartree  *
*   SCF-energy                    : -14407.7485374      *
*   SCF + E(vib0)                 : -14407.7433345      *
    
```

-----  
 Vibrational Spectrum

| #  | mode | symmetry | wave number<br>cm**(-1) | IR intensity<br>km/mol | selection rules |       |
|----|------|----------|-------------------------|------------------------|-----------------|-------|
| #  |      |          |                         |                        | IR              | RAMAN |
| 1  |      |          | 0.00                    | 0.00000                | -               | -     |
| 2  |      |          | 0.00                    | 0.00000                | -               | -     |
| 3  |      |          | 0.00                    | 0.00000                | -               | -     |
| 4  |      |          | 0.00                    | 0.00000                | -               | -     |
| 5  |      |          | 0.00                    | 0.00000                | -               | -     |
| 6  |      |          | 0.00                    | 0.00000                | -               | -     |
| 7  |      | eu       | 81.92                   | 0.22858                | YES             | NO    |
| 8  |      | eu       | 81.92                   | 0.22858                | YES             | NO    |
| 9  |      | eg       | 101.46                  | 0.00000                | NO              | YES   |
| 10 |      | eg       | 101.46                  | 0.00000                | NO              | YES   |
| 11 |      | alg      | 134.55                  | 0.00000                | NO              | YES   |
| 12 |      | a2u      | 157.22                  | 0.12040                | YES             | NO    |
| 13 |      | alu      | 235.79                  | 0.00000                | NO              | NO    |
| 14 |      | eg       | 272.24                  | 0.00000                | NO              | YES   |
| 15 |      | eg       | 272.24                  | 0.00000                | NO              | YES   |
| 16 |      | eu       | 279.37                  | 2.01254                | YES             | NO    |
| 17 |      | eu       | 279.37                  | 2.01254                | YES             | NO    |
| 18 |      | alg      | 286.25                  | 0.00000                | NO              | YES   |

-----  
 HOMO-LUMO Gap

```

Gap :                      +0.15831980 H =      +4.30810 eV
    
```

-----  
 ag3se6\_2\_pbe0tzvpp

\$coord

```

-4.58608472476816      -1.65784546438280      0.0000000000000000      se
12.58149741021154      0.27220843919987      0.0000000000000000      se
-10.43850245800284     -2.03113808852881      3.47957002063485      se
 6.73507343421790      -0.33438183771069      3.44056284544297      se
-12.58149741021154     -0.27220843919987      0.0000000000000000      se
 4.58608472476816      1.65784546438280      0.0000000000000000      se
-6.73507343421790      0.33438183771070      -3.44056284544297      se
10.43850245800284      2.03113808852881      -3.47957002063485      se
-6.73507343421790      0.33438183771070      3.44056284544297      se
10.43850245800284      2.03113808852881      3.47957002063485      se
-10.43850245800284     -2.03113808852881      -3.47957002063485      se
 6.73507343421790      -0.33438183771069      -3.44056284544297      se
 0.0000000000000000      0.0000000000000000      0.0000000000000000      ag
-9.38874861283560      3.81464125421326      0.0000000000000000      ag
 9.38874861283560      -3.81464125421326      0.0000000000000000      ag
    
```

\$end

-----  
 SCF and ZP-Energy

```

* zero point VIBRATIONAL energy :      0.0122686  Hartree  *
*   SCF-energy                    : -29255.5930513      *
*   SCF + E(vib0)                 : -29255.5807827      *
    
```

-----  
 Vibrational Spectrum

| # | mode | symmetry | wave number<br>cm**(-1) | IR intensity<br>km/mol | selection rules |       |
|---|------|----------|-------------------------|------------------------|-----------------|-------|
| # |      |          |                         |                        | IR              | RAMAN |
| 1 |      |          | 0.00                    | 0.00000                | -               | -     |

|    |    |        |          |     |     |
|----|----|--------|----------|-----|-----|
| 2  |    | 0.00   | 0.00000  | -   | -   |
| 3  |    | 0.00   | 0.00000  | -   | -   |
| 4  |    | 0.00   | 0.00000  | -   | -   |
| 5  |    | 0.00   | 0.00000  | -   | -   |
| 6  |    | 0.00   | 0.00000  | -   | -   |
| 7  | au | 3.62   | 0.17852  | YES | NO  |
| 8  | au | 6.67   | 0.09790  | YES | NO  |
| 9  | bu | 6.91   | 0.24268  | YES | NO  |
| 10 | ag | 17.59  | 0.00000  | NO  | YES |
| 11 | bg | 26.26  | 0.00000  | NO  | YES |
| 12 | ag | 38.60  | 0.00000  | NO  | YES |
| 13 | bu | 41.12  | 0.93158  | YES | NO  |
| 14 | au | 44.11  | 0.45432  | YES | NO  |
| 15 | bg | 45.66  | 0.00000  | NO  | YES |
| 16 | ag | 55.68  | 0.00000  | NO  | YES |
| 17 | au | 62.17  | 0.00633  | YES | NO  |
| 18 | bu | 63.68  | 2.01476  | YES | NO  |
| 19 | bu | 84.22  | 0.32458  | YES | NO  |
| 20 | bg | 85.54  | 0.00000  | NO  | YES |
| 21 | au | 85.74  | 0.01690  | YES | NO  |
| 22 | ag | 88.39  | 0.00000  | NO  | YES |
| 23 | bu | 89.17  | 5.09804  | YES | NO  |
| 24 | bg | 109.61 | 0.00000  | NO  | YES |
| 25 | au | 109.88 | 1.11794  | YES | NO  |
| 26 | ag | 116.28 | 0.00000  | NO  | YES |
| 27 | ag | 118.60 | 0.00000  | NO  | YES |
| 28 | bu | 119.05 | 0.30035  | YES | NO  |
| 29 | bu | 130.70 | 1.59619  | YES | NO  |
| 30 | ag | 165.81 | 0.00000  | NO  | YES |
| 31 | bu | 174.94 | 4.38169  | YES | NO  |
| 32 | ag | 181.69 | 0.00000  | NO  | YES |
| 33 | bu | 198.62 | 4.47297  | YES | NO  |
| 34 | bg | 218.49 | 0.00000  | NO  | YES |
| 35 | au | 219.93 | 0.24666  | YES | NO  |
| 36 | bu | 242.95 | 19.12701 | YES | NO  |
| 37 | ag | 244.38 | 0.00000  | NO  | YES |
| 38 | bg | 262.79 | 0.00000  | NO  | YES |
| 39 | au | 263.30 | 0.50985  | YES | NO  |
| 40 | ag | 266.39 | 0.00000  | NO  | YES |
| 41 | bu | 266.44 | 0.22759  | YES | NO  |
| 42 | bg | 280.91 | 0.00000  | NO  | YES |
| 43 | au | 281.12 | 0.07659  | YES | NO  |
| 44 | ag | 284.09 | 0.00000  | NO  | YES |
| 45 | bu | 284.18 | 1.01866  | YES | NO  |

-----  
 HOMO-LUMO Gap

Gap : +0.14625249 H = +3.97974 eV  
 -----

### S 4.3.2 Bond Analysis

Ag<sub>2</sub>Se<sub>6</sub>(SO<sub>2</sub>)<sub>4</sub><sup>2+</sup> (2)

Second Order Perturbation Theory Analysis of Fock Matrix in NBO Basis

Threshold for printing: 1.0 kcal/mol  
 (Intermolecular threshold: 0.05 kcal/mol)

| Donor NBO (i)        | Acceptor NBO (j)        | E(2)<br>kcal/mol | E(j)-E(i)<br>a.u. | F(i,j)<br>a.u. |
|----------------------|-------------------------|------------------|-------------------|----------------|
| 1. BD ( 1) S 1 - 0 3 | /284. RY*( 2) O 4       | 1.21             | 1.96              | 0.044          |
| 1. BD ( 1) S 1 - 0 3 | /796. BD*( 2) S 1 - 0 3 | 22.02            | 1.10              | 0.143          |
| 1. BD ( 1) S 1 - 0 3 | /797. BD*( 1) S 1 - 0 4 | 19.96            | 1.07              | 0.133          |
| 2. BD ( 2) S 1 - 0 3 | /284. RY*( 2) O 4       | 2.61             | 1.66              | 0.061          |
| 2. BD ( 2) S 1 - 0 3 | /300. RY*( 18) O 4      | 2.17             | 2.17              | 0.063          |
| 2. BD ( 2) S 1 - 0 3 | /795. BD*( 1) S 1 - 0 3 | 19.14            | 0.82              | 0.113          |
| 2. BD ( 2) S 1 - 0 3 | /796. BD*( 2) S 1 - 0 3 | 2.21             | 0.80              | 0.038          |

|      |     |      |   |       |   |       |          |    |       |   |        |       |       |
|------|-----|------|---|-------|---|-------|----------|----|-------|---|--------|-------|-------|
| 2.   | BD  | ( 2) | S | 1 - 0 | 3 | /797. | BD*( 1)  | S  | 1 - 0 | 4 | 47.95  | 0.78  | 0.173 |
| 2.   | BD  | ( 2) | S | 1 - 0 | 3 | /798. | BD*( 2)  | S  | 1 - 0 | 4 | 1.84   | 0.88  | 0.036 |
| 3.   | BD  | ( 1) | S | 1 - 0 | 4 | /259. | RY*( 3)  | O  | 3     |   | 2.52   | 1.20  | 0.051 |
| 3.   | BD  | ( 1) | S | 1 - 0 | 4 | /263. | RY*( 7)  | O  | 3     |   | 1.81   | 2.14  | 0.058 |
| 3.   | BD  | ( 1) | S | 1 - 0 | 4 | /274. | RY*( 18) | O  | 3     |   | 1.01   | 2.40  | 0.046 |
| 3.   | BD  | ( 1) | S | 1 - 0 | 4 | /284. | RY*( 2)  | O  | 4     |   | 1.48   | 1.52  | 0.044 |
| 3.   | BD  | ( 1) | S | 1 - 0 | 4 | /300. | RY*( 18) | O  | 4     |   | 1.11   | 2.02  | 0.044 |
| 3.   | BD  | ( 1) | S | 1 - 0 | 4 | /795. | BD*( 1)  | S  | 1 - 0 | 3 | 19.93  | 0.68  | 0.104 |
| 3.   | BD  | ( 1) | S | 1 - 0 | 4 | /796. | BD*( 2)  | S  | 1 - 0 | 3 | 61.34  | 0.66  | 0.180 |
| 3.   | BD  | ( 1) | S | 1 - 0 | 4 | /797. | BD*( 1)  | S  | 1 - 0 | 4 | 16.39  | 0.63  | 0.091 |
| 3.   | BD  | ( 1) | S | 1 - 0 | 4 | /798. | BD*( 2)  | S  | 1 - 0 | 4 | 1.15   | 0.73  | 0.026 |
| 4.   | BD  | ( 2) | S | 1 - 0 | 4 | /796. | BD*( 2)  | S  | 1 - 0 | 3 | 3.07   | 1.27  | 0.058 |
| 4.   | BD  | ( 2) | S | 1 - 0 | 4 | /797. | BD*( 1)  | S  | 1 - 0 | 4 | 1.28   | 1.25  | 0.037 |
| 34.  | CR  | ( 1) | O | 4     |   | /194. | RY*( 2)  | S  | 1     |   | 1.25   | 19.92 | 0.142 |
| 34.  | CR  | ( 1) | O | 4     |   | /195. | RY*( 3)  | S  | 1     |   | 1.01   | 20.65 | 0.129 |
| 145. | LP  | ( 1) | O | 3     |   | /196. | RY*( 4)  | S  | 1     |   | 3.20   | 2.36  | 0.079 |
| 145. | LP  | ( 1) | O | 3     |   | /798. | BD*( 2)  | S  | 1 - 0 | 4 | 1.54   | 1.21  | 0.039 |
| 146. | LP  | ( 2) | O | 3     |   | /193. | RY*( 1)  | S  | 1     |   | 11.34  | 1.03  | 0.098 |
| 146. | LP  | ( 2) | O | 3     |   | /194. | RY*( 2)  | S  | 1     |   | 3.46   | 1.27  | 0.061 |
| 146. | LP  | ( 2) | O | 3     |   | /798. | BD*( 2)  | S  | 1 - 0 | 4 | 17.64  | 0.73  | 0.103 |
| 147. | LP  | ( 1) | O | 4     |   | /195. | RY*( 3)  | S  | 1     |   | 4.25   | 2.47  | 0.092 |
| 148. | LP  | ( 2) | O | 4     |   | /193. | RY*( 1)  | S  | 1     |   | 20.35  | 0.99  | 0.130 |
| 148. | LP  | ( 2) | O | 4     |   | /795. | BD*( 1)  | S  | 1 - 0 | 3 | 19.65  | 0.64  | 0.101 |
| 148. | LP  | ( 2) | O | 4     |   | /796. | BD*( 2)  | S  | 1 - 0 | 3 | 7.64   | 0.62  | 0.061 |
| 795. | BD* | ( 1) | S | 1 - 0 | 3 | /193. | RY*( 1)  | S  | 1     |   | 10.27  | 0.36  | 0.168 |
| 795. | BD* | ( 1) | S | 1 - 0 | 3 | /194. | RY*( 2)  | S  | 1     |   | 9.08   | 0.59  | 0.227 |
| 795. | BD* | ( 1) | S | 1 - 0 | 3 | /260. | RY*( 4)  | O  | 3     |   | 1.02   | 1.11  | 0.116 |
| 795. | BD* | ( 1) | S | 1 - 0 | 3 | /798. | BD*( 2)  | S  | 1 - 0 | 4 | 1.65   | 0.06  | 0.026 |
| 796. | BD* | ( 2) | S | 1 - 0 | 3 | /193. | RY*( 1)  | S  | 1     |   | 3.99   | 0.38  | 0.101 |
| 796. | BD* | ( 2) | S | 1 - 0 | 3 | /194. | RY*( 2)  | S  | 1     |   | 3.55   | 0.62  | 0.133 |
| 796. | BD* | ( 2) | S | 1 - 0 | 3 | /198. | RY*( 6)  | S  | 1     |   | 1.41   | 0.59  | 0.090 |
| 796. | BD* | ( 2) | S | 1 - 0 | 3 | /259. | RY*( 3)  | O  | 3     |   | 1.78   | 0.54  | 0.096 |
| 796. | BD* | ( 2) | S | 1 - 0 | 3 | /263. | RY*( 7)  | O  | 3     |   | 1.32   | 1.48  | 0.138 |
| 796. | BD* | ( 2) | S | 1 - 0 | 3 | /284. | RY*( 2)  | O  | 4     |   | 1.79   | 0.86  | 0.122 |
| 796. | BD* | ( 2) | S | 1 - 0 | 3 | /300. | RY*( 18) | O  | 4     |   | 1.04   | 1.37  | 0.117 |
| 796. | BD* | ( 2) | S | 1 - 0 | 3 | /795. | BD*( 1)  | S  | 1 - 0 | 3 | 1.54   | 0.02  | 0.013 |
| 796. | BD* | ( 2) | S | 1 - 0 | 3 | /798. | BD*( 2)  | S  | 1 - 0 | 4 | 8.47   | 0.08  | 0.064 |
| 797. | BD* | ( 1) | S | 1 - 0 | 4 | /218. | RY*( 26) | S  | 1     |   | 1.06   | 2.00  | 0.157 |
| 797. | BD* | ( 1) | S | 1 - 0 | 4 | /259. | RY*( 3)  | O  | 3     |   | 1.34   | 0.56  | 0.094 |
| 797. | BD* | ( 1) | S | 1 - 0 | 4 | /284. | RY*( 2)  | O  | 4     |   | 1.77   | 0.88  | 0.135 |
| 797. | BD* | ( 1) | S | 1 - 0 | 4 | /300. | RY*( 18) | O  | 4     |   | 2.85   | 1.39  | 0.215 |
| 797. | BD* | ( 1) | S | 1 - 0 | 4 | /795. | BD*( 1)  | S  | 1 - 0 | 3 | 123.02 | 0.04  | 0.178 |
| 797. | BD* | ( 1) | S | 1 - 0 | 4 | /796. | BD*( 2)  | S  | 1 - 0 | 3 | 770.44 | 0.02  | 0.305 |
| 1.   | BD  | ( 1) | S | 1 - 0 | 3 | /165. | LP*( 7)  | Ag | 10    |   | 2.89   | 0.90  | 0.046 |
| 2.   | BD  | ( 2) | S | 1 - 0 | 3 | /165. | LP*( 7)  | Ag | 10    |   | 1.14   | 0.60  | 0.023 |
| 4.   | BD  | ( 2) | S | 1 - 0 | 4 | /165. | LP*( 7)  | Ag | 10    |   | 1.30   | 1.07  | 0.034 |
| 24.  | CR  | ( 2) | S | 1     |   | /165. | LP*( 7)  | Ag | 10    |   | 4.20   | 9.39  | 0.182 |
| 33.  | CR  | ( 1) | O | 3     |   | /165. | LP*( 7)  | Ag | 10    |   | 2.23   | 19.14 | 0.189 |
| 143. | LP  | ( 1) | S | 1     |   | /164. | LP*( 6)  | Ag | 10    |   | 1.01   | 0.61  | 0.024 |
| 143. | LP  | ( 1) | S | 1     |   | /165. | LP*( 7)  | Ag | 10    |   | 9.38   | 0.73  | 0.075 |
| 145. | LP  | ( 1) | O | 3     |   | /164. | LP*( 6)  | Ag | 10    |   | 5.96   | 0.82  | 0.066 |
| 145. | LP  | ( 1) | O | 3     |   | /165. | LP*( 7)  | Ag | 10    |   | 12.63  | 0.94  | 0.098 |
| 145. | LP  | ( 1) | O | 3     |   | /166. | LP*( 8)  | Ag | 10    |   | 1.69   | 0.93  | 0.036 |
| 145. | LP  | ( 1) | O | 3     |   | /167. | LP*( 9)  | Ag | 10    |   | 1.37   | 0.92  | 0.032 |
| 146. | LP  | ( 2) | O | 3     |   | /164. | LP*( 6)  | Ag | 10    |   | 5.33   | 0.33  | 0.039 |
| 146. | LP  | ( 2) | O | 3     |   | /165. | LP*( 7)  | Ag | 10    |   | 2.78   | 0.45  | 0.032 |
| 147. | LP  | ( 1) | O | 4     |   | /165. | LP*( 7)  | Ag | 10    |   | 2.81   | 0.93  | 0.047 |
| 5.   | BD  | ( 1) | S | 2 - 0 | 5 | /800. | BD*( 2)  | S  | 2 - 0 | 5 | 24.41  | 1.04  | 0.145 |
| 5.   | BD  | ( 1) | S | 2 - 0 | 5 | /801. | BD*( 1)  | S  | 2 - 0 | 6 | 27.62  | 1.01  | 0.152 |
| 6.   | BD  | ( 2) | S | 2 - 0 | 5 | /337. | RY*( 3)  | O  | 6     |   | 2.50   | 1.68  | 0.059 |
| 6.   | BD  | ( 2) | S | 2 - 0 | 5 | /342. | RY*( 8)  | O  | 6     |   | 1.53   | 2.33  | 0.055 |
| 6.   | BD  | ( 2) | S | 2 - 0 | 5 | /799. | BD*( 1)  | S  | 2 - 0 | 5 | 22.85  | 0.88  | 0.128 |
| 6.   | BD  | ( 2) | S | 2 - 0 | 5 | /800. | BD*( 2)  | S  | 2 - 0 | 5 | 1.01   | 0.86  | 0.027 |
| 6.   | BD  | ( 2) | S | 2 - 0 | 5 | /801. | BD*( 1)  | S  | 2 - 0 | 6 | 40.39  | 0.84  | 0.166 |
| 6.   | BD  | ( 2) | S | 2 - 0 | 5 | /802. | BD*( 2)  | S  | 2 - 0 | 6 | 3.68   | 0.92  | 0.052 |
| 7.   | BD  | ( 1) | S | 2 - 0 | 6 | /253. | RY*( 29) | S  | 2     |   | 1.25   | 2.66  | 0.053 |
| 7.   | BD  | ( 1) | S | 2 - 0 | 6 | /311. | RY*( 3)  | O  | 5     |   | 2.63   | 1.31  | 0.054 |
| 7.   | BD  | ( 1) | S | 2 - 0 | 6 | /315. | RY*( 7)  | O  | 5     |   | 1.09   | 2.36  | 0.047 |
| 7.   | BD  | ( 1) | S | 2 - 0 | 6 | /316. | RY*( 8)  | O  | 5     |   | 1.05   | 2.27  | 0.045 |
| 7.   | BD  | ( 1) | S | 2 - 0 | 6 | /322. | RY*( 14) | O  | 5     |   | 1.21   | 2.11  | 0.047 |
| 7.   | BD  | ( 1) | S | 2 - 0 | 6 | /337. | RY*( 3)  | O  | 6     |   | 1.29   | 1.50  | 0.041 |
| 7.   | BD  | ( 1) | S | 2 - 0 | 6 | /799. | BD*( 1)  | S  | 2 - 0 | 5 | 27.43  | 0.70  | 0.124 |
| 7.   | BD  | ( 1) | S | 2 - 0 | 6 | /800. | BD*( 2)  | S  | 2 - 0 | 5 | 45.29  | 0.68  | 0.157 |
| 7.   | BD  | ( 1) | S | 2 - 0 | 6 | /801. | BD*( 1)  | S  | 2 - 0 | 6 | 13.31  | 0.65  | 0.083 |
| 7.   | BD  | ( 1) | S | 2 - 0 | 6 | /802. | BD*( 2)  | S  | 2 - 0 | 6 | 3.09   | 0.74  | 0.043 |
| 8.   | BD  | ( 2) | S | 2 - 0 | 6 | /800. | BD*( 2)  | S  | 2 - 0 | 5 | 5.23   | 1.26  | 0.075 |
| 8.   | BD  | ( 2) | S | 2 - 0 | 6 | /801. | BD*( 1)  | S  | 2 - 0 | 6 | 3.48   | 1.23  | 0.060 |
| 36.  | CR  | ( 1) | O | 6     |   | /226. | RY*( 2)  | S  | 2     |   | 1.17   | 19.93 | 0.138 |
| 149. | LP  | ( 1) | O | 5     |   | /228. | RY*( 4)  | S  | 2     |   | 3.34   | 2.36  | 0.080 |
| 149. | LP  | ( 1) | O | 5     |   | /802. | BD*( 2)  | S  | 2 - 0 | 6 | 1.08   | 1.20  | 0.033 |
| 150. | LP  | ( 2) | O | 5     |   | /225. | RY*( 1)  | S  | 2     |   | 13.22  | 1.00  | 0.105 |
| 150. | LP  | ( 2) | O | 5     |   | /226. | RY*( 2)  | S  | 2     |   | 3.02   | 1.26  | 0.057 |



|      |     |   |    |    |        |       |       |     |    |     |        |        |       |        |       |       |
|------|-----|---|----|----|--------|-------|-------|-----|----|-----|--------|--------|-------|--------|-------|-------|
| 150. | LP  | ( | 2) | O  | 5      | /801. | BD*   | (   | 1) | S   | 2 - O  | 6      | 1.07  | 0.62   | 0.023 |       |
| 150. | LP  | ( | 2) | O  | 5      | /802. | BD*   | (   | 2) | S   | 2 - O  | 6      | 19.17 | 0.70   | 0.105 |       |
| 151. | LP  | ( | 1) | O  | 6      | /227. | RY*   | (   | 3) | S   | 2      |        | 4.38  | 2.59   | 0.095 |       |
| 152. | LP  | ( | 2) | O  | 6      | /225. | RY*   | (   | 1) | S   | 2      |        | 18.90 | 0.99   | 0.125 |       |
| 152. | LP  | ( | 2) | O  | 6      | /226. | RY*   | (   | 2) | S   | 2      |        | 1.28  | 1.24   | 0.037 |       |
| 152. | LP  | ( | 2) | O  | 6      | /799. | BD*   | (   | 1) | S   | 2 - O  | 5      | 16.58 | 0.64   | 0.093 |       |
| 152. | LP  | ( | 2) | O  | 6      | /800. | BD*   | (   | 2) | S   | 2 - O  | 5      | 10.02 | 0.63   | 0.071 |       |
| 799. | BD* | ( | 1) | S  | 2 - O  | 5     | /225. | RY* | (  | 1)  | S      | 2      | 7.47  | 0.34   | 0.140 |       |
| 799. | BD* | ( | 1) | S  | 2 - O  | 5     | /226. | RY* | (  | 2)  | S      | 2      | 9.04  | 0.60   | 0.226 |       |
| 800. | BD* | ( | 2) | S  | 2 - O  | 5     | /225. | RY* | (  | 1)  | S      | 2      | 4.47  | 0.36   | 0.107 |       |
| 800. | BD* | ( | 2) | S  | 2 - O  | 5     | /226. | RY* | (  | 2)  | S      | 2      | 5.38  | 0.61   | 0.168 |       |
| 800. | BD* | ( | 2) | S  | 2 - O  | 5     | /230. | RY* | (  | 6)  | S      | 2      | 2.06  | 0.30   | 0.081 |       |
| 800. | BD* | ( | 2) | S  | 2 - O  | 5     | /253. | RY* | (  | 29) | S      | 2      | 1.19  | 1.98   | 0.157 |       |
| 800. | BD* | ( | 2) | S  | 2 - O  | 5     | /311. | RY* | (  | 3)  | O      | 5      | 1.35  | 0.63   | 0.094 |       |
| 800. | BD* | ( | 2) | S  | 2 - O  | 5     | /322. | RY* | (  | 14) | O      | 5      | 1.07  | 1.43   | 0.127 |       |
| 800. | BD* | ( | 2) | S  | 2 - O  | 5     | /337. | RY* | (  | 3)  | O      | 6      | 1.26  | 0.82   | 0.103 |       |
| 800. | BD* | ( | 2) | S  | 2 - O  | 5     | /799. | BD* | (  | 1)  | S      | 2 - O  | 5     | 4.91   | 0.02  | 0.021 |
| 800. | BD* | ( | 2) | S  | 2 - O  | 5     | /802. | BD* | (  | 2)  | S      | 2 - O  | 6     | 20.62  | 0.06  | 0.086 |
| 801. | BD* | ( | 1) | S  | 2 - O  | 6     | /230. | RY* | (  | 6)  | S      | 2      | 1.82  | 0.33   | 0.082 |       |
| 801. | BD* | ( | 1) | S  | 2 - O  | 6     | /253. | RY* | (  | 29) | S      | 2      | 1.12  | 2.00   | 0.157 |       |
| 801. | BD* | ( | 1) | S  | 2 - O  | 6     | /311. | RY* | (  | 3)  | O      | 5      | 1.48  | 0.66   | 0.103 |       |
| 801. | BD* | ( | 1) | S  | 2 - O  | 6     | /337. | RY* | (  | 3)  | O      | 6      | 1.39  | 0.84   | 0.113 |       |
| 801. | BD* | ( | 1) | S  | 2 - O  | 6     | /342. | RY* | (  | 8)  | O      | 6      | 1.38  | 1.49   | 0.151 |       |
| 801. | BD* | ( | 1) | S  | 2 - O  | 6     | /799. | BD* | (  | 1)  | S      | 2 - O  | 5     | 191.52 | 0.04  | 0.213 |
| 801. | BD* | ( | 1) | S  | 2 - O  | 6     | /800. | BD* | (  | 2)  | S      | 2 - O  | 5     | 549.77 | 0.02  | 0.271 |
| 5.   | BD  | ( | 1) | S  | 2 - O  | 5     | /166. | LP* | (  | 8)  | Ag     | 10     | 3.37  | 0.83   | 0.047 |       |
| 6.   | BD  | ( | 2) | S  | 2 - O  | 5     | /166. | LP* | (  | 8)  | Ag     | 10     | 1.79  | 0.66   | 0.031 |       |
| 29.  | CR  | ( | 2) | S  | 2      | /166. | LP*   | (   | 8) | Ag  | 10     | 3.14   | 9.38  | 0.157  |       |       |
| 35.  | CR  | ( | 1) | O  | 5      | /166. | LP*   | (   | 8) | Ag  | 10     | 2.27   | 19.13 | 0.190  |       |       |
| 144. | LP  | ( | 1) | S  | 2      | /164. | LP*   | (   | 6) | Ag  | 10     | 1.17   | 0.61  | 0.025  |       |       |
| 144. | LP  | ( | 1) | S  | 2      | /166. | LP*   | (   | 8) | Ag  | 10     | 7.03   | 0.73  | 0.065  |       |       |
| 149. | LP  | ( | 1) | O  | 5      | /164. | LP*   | (   | 6) | Ag  | 10     | 4.54   | 0.82  | 0.058  |       |       |
| 149. | LP  | ( | 1) | O  | 5      | /166. | LP*   | (   | 8) | Ag  | 10     | 14.86  | 0.93  | 0.106  |       |       |
| 150. | LP  | ( | 2) | O  | 5      | /164. | LP*   | (   | 6) | Ag  | 10     | 3.05   | 0.32  | 0.029  |       |       |
| 150. | LP  | ( | 2) | O  | 5      | /166. | LP*   | (   | 8) | Ag  | 10     | 1.76   | 0.44  | 0.025  |       |       |
| 151. | LP  | ( | 1) | O  | 6      | /165. | LP*   | (   | 7) | Ag  | 10     | 1.05   | 0.93  | 0.029  |       |       |
| 151. | LP  | ( | 1) | O  | 6      | /166. | LP*   | (   | 8) | Ag  | 10     | 1.31   | 0.93  | 0.032  |       |       |
| 153. | LP  | ( | 1) | Se | 7      | /805. | BD*   | (   | 1) | Se  | 8 -Se  | 9      | 1.07  | 0.72   | 0.025 |       |
| 153. | LP  | ( | 1) | Se | 7      | /807. | BD*   | (   | 1) | Se  | 11 -Se | 14     | 1.13  | 0.72   | 0.026 |       |
| 154. | LP  | ( | 2) | Se | 7      | /368. | RY*   | (   | 8) | Se  | 7      | 1.53   | 1.23  | 0.040  |       |       |
| 154. | LP  | ( | 2) | Se | 7      | /805. | BD*   | (   | 1) | Se  | 8 -Se  | 9      | 1.97  | 0.34   | 0.024 |       |
| 154. | LP  | ( | 2) | Se | 7      | /807. | BD*   | (   | 1) | Se  | 11 -Se | 14     | 1.95  | 0.34   | 0.024 |       |
| 156. | LP  | ( | 2) | Se | 8      | /421. | RY*   | (   | 1) | Se  | 9      | 1.30   | 0.87  | 0.031  |       |       |
| 156. | LP  | ( | 2) | Se | 8      | /803. | BD*   | (   | 1) | Se  | 7 -Se  | 9      | 3.84  | 0.28   | 0.030 |       |
| 156. | LP  | ( | 2) | Se | 8      | /808. | BD*   | (   | 1) | Se  | 12 -Se | 14     | 3.63  | 0.28   | 0.029 |       |
| 158. | LP  | ( | 2) | Se | 9      | /361. | RY*   | (   | 1) | Se  | 7      | 1.45   | 0.78  | 0.031  |       |       |
| 158. | LP  | ( | 2) | Se | 9      | /391. | RY*   | (   | 1) | Se  | 8      | 1.55   | 0.82  | 0.033  |       |       |
| 158. | LP  | ( | 2) | Se | 9      | /804. | BD*   | (   | 1) | Se  | 7 -Se  | 11     | 5.13  | 0.25   | 0.032 |       |
| 158. | LP  | ( | 2) | Se | 9      | /806. | BD*   | (   | 1) | Se  | 8 -Se  | 12     | 5.56  | 0.25   | 0.033 |       |
| 169. | LP  | ( | 2) | Se | 11     | /597. | RY*   | (   | 1) | Se  | 14     | 1.31   | 0.87  | 0.031  |       |       |
| 169. | LP  | ( | 2) | Se | 11     | /803. | BD*   | (   | 1) | Se  | 7 -Se  | 9      | 3.68  | 0.28   | 0.029 |       |
| 169. | LP  | ( | 2) | Se | 11     | /808. | BD*   | (   | 1) | Se  | 12 -Se | 14     | 3.90  | 0.28   | 0.030 |       |
| 170. | LP  | ( | 1) | Se | 12     | /805. | BD*   | (   | 1) | Se  | 8 -Se  | 9      | 1.13  | 0.72   | 0.026 |       |
| 170. | LP  | ( | 1) | Se | 12     | /807. | BD*   | (   | 1) | Se  | 11 -Se | 14     | 1.08  | 0.72   | 0.025 |       |
| 171. | LP  | ( | 2) | Se | 12     | /531. | RY*   | (   | 8) | Se  | 12     | 1.55   | 1.23  | 0.041  |       |       |
| 171. | LP  | ( | 2) | Se | 12     | /805. | BD*   | (   | 1) | Se  | 8 -Se  | 9      | 1.94  | 0.34   | 0.024 |       |
| 171. | LP  | ( | 2) | Se | 12     | /807. | BD*   | (   | 1) | Se  | 11 -Se | 14     | 1.96  | 0.34   | 0.024 |       |
| 182. | LP  | ( | 2) | Se | 14     | /494. | RY*   | (   | 1) | Se  | 11     | 1.54   | 0.82  | 0.033  |       |       |
| 182. | LP  | ( | 2) | Se | 14     | /524. | RY*   | (   | 1) | Se  | 12     | 1.46   | 0.78  | 0.031  |       |       |
| 182. | LP  | ( | 2) | Se | 14     | /804. | BD*   | (   | 1) | Se  | 7 -Se  | 11     | 5.57  | 0.25   | 0.033 |       |
| 182. | LP  | ( | 2) | Se | 14     | /806. | BD*   | (   | 1) | Se  | 8 -Se  | 12     | 5.15  | 0.25   | 0.032 |       |
| 804. | BD* | ( | 1) | Se | 7 -Se  | 11    | /807. | BD* | (  | 1)  | Se     | 11 -Se | 14    | 1.98   | 0.01  | 0.014 |
| 806. | BD* | ( | 1) | Se | 8 -Se  | 12    | /805. | BD* | (  | 1)  | Se     | 8 -Se  | 9     | 1.95   | 0.01  | 0.014 |
| 9.   | BD  | ( | 1) | Se | 7 -Se  | 9     | /164. | LP* | (  | 6)  | Ag     | 10     | 3.07  | 0.50   | 0.038 |       |
| 9.   | BD  | ( | 1) | Se | 7 -Se  | 9     | /165. | LP* | (  | 7)  | Ag     | 10     | 3.42  | 0.62   | 0.042 |       |
| 9.   | BD  | ( | 1) | Se | 7 -Se  | 9     | /167. | LP* | (  | 9)  | Ag     | 10     | 1.34  | 0.60   | 0.026 |       |
| 10.  | BD  | ( | 1) | Se | 7 -Se  | 11    | /164. | LP* | (  | 6)  | Ag     | 10     | 2.25  | 0.50   | 0.032 |       |
| 10.  | BD  | ( | 1) | Se | 7 -Se  | 11    | /165. | LP* | (  | 7)  | Ag     | 10     | 1.27  | 0.62   | 0.026 |       |
| 10.  | BD  | ( | 1) | Se | 7 -Se  | 11    | /166. | LP* | (  | 8)  | Ag     | 10     | 2.33  | 0.62   | 0.034 |       |
| 10.  | BD  | ( | 1) | Se | 7 -Se  | 11    | /167. | LP* | (  | 9)  | Ag     | 10     | 1.47  | 0.60   | 0.027 |       |
| 11.  | BD  | ( | 1) | Se | 8 -Se  | 9     | /164. | LP* | (  | 6)  | Ag     | 10     | 2.61  | 0.50   | 0.035 |       |
| 11.  | BD  | ( | 1) | Se | 8 -Se  | 9     | /165. | LP* | (  | 7)  | Ag     | 10     | 4.77  | 0.62   | 0.050 |       |
| 12.  | BD  | ( | 1) | Se | 8 -Se  | 12    | /164. | LP* | (  | 6)  | Ag     | 10     | 1.25  | 0.50   | 0.024 |       |
| 12.  | BD  | ( | 1) | Se | 8 -Se  | 12    | /165. | LP* | (  | 7)  | Ag     | 10     | 2.10  | 0.62   | 0.033 |       |
| 12.  | BD  | ( | 1) | Se | 8 -Se  | 12    | /167. | LP* | (  | 9)  | Ag     | 10     | 1.04  | 0.60   | 0.023 |       |
| 13.  | BD  | ( | 1) | Se | 11 -Se | 14    | /164. | LP* | (  | 6)  | Ag     | 10     | 1.43  | 0.50   | 0.026 |       |
| 13.  | BD  | ( | 1) | Se | 11 -Se | 14    | /166. | LP* | (  | 8)  | Ag     | 10     | 3.49  | 0.62   | 0.042 |       |
| 14.  | BD  | ( | 1) | Se | 12 -Se | 14    | /164. | LP* | (  | 6)  | Ag     | 10     | 1.04  | 0.50   | 0.022 |       |
| 14.  | BD  | ( | 1) | Se | 12 -Se | 14    | /166. | LP* | (  | 8)  | Ag     | 10     | 2.34  | 0.62   | 0.035 |       |
| 39.  | CR  | ( | 3) | Se | 7      | /164. | LP*   | (   | 6) | Ag  | 10     | 5.87   | 10.72 | 0.241  |       |       |
| 39.  | CR  | ( | 3) | Se | 7      | /165. | LP*   | (   | 7) | Ag  | 10     | 3.10   | 10.84 | 0.168  |       |       |
| 39.  | CR  | ( | 3) | Se | 7      | /166. | LP*   | (   | 8) | Ag  | 10     | 2.07   | 10.83 | 0.137  |       |       |

|      |    |        |           |       |            |    |       |       |       |
|------|----|--------|-----------|-------|------------|----|-------|-------|-------|
| 39.  | CR | ( 3)Se | 7         | /167. | LP*( 9)Ag  | 10 | 5.44  | 10.82 | 0.219 |
| 53.  | CR | ( 3)Se | 8         | /164. | LP*( 6)Ag  | 10 | 3.55  | 10.66 | 0.187 |
| 53.  | CR | ( 3)Se | 8         | /165. | LP*( 7)Ag  | 10 | 5.87  | 10.78 | 0.230 |
| 53.  | CR | ( 3)Se | 8         | /167. | LP*( 9)Ag  | 10 | 2.23  | 10.76 | 0.140 |
| 67.  | CR | ( 3)Se | 9         | /164. | LP*( 6)Ag  | 10 | 1.26  | 10.61 | 0.111 |
| 67.  | CR | ( 3)Se | 9         | /165. | LP*( 7)Ag  | 10 | 3.00  | 10.73 | 0.164 |
| 85.  | CR | ( 3)Se | 11        | /166. | LP*( 8)Ag  | 10 | 1.78  | 10.77 | 0.126 |
| 117. | CR | ( 3)Se | 14        | /164. | LP*( 6)Ag  | 10 | 2.21  | 10.61 | 0.147 |
| 117. | CR | ( 3)Se | 14        | /166. | LP*( 8)Ag  | 10 | 5.11  | 10.73 | 0.214 |
| 153. | LP | ( 1)Se | 7         | /164. | LP*( 6)Ag  | 10 | 9.42  | 0.72  | 0.078 |
| 153. | LP | ( 1)Se | 7         | /165. | LP*( 7)Ag  | 10 | 4.10  | 0.84  | 0.053 |
| 153. | LP | ( 1)Se | 7         | /166. | LP*( 8)Ag  | 10 | 2.45  | 0.84  | 0.041 |
| 153. | LP | ( 1)Se | 7         | /167. | LP*( 9)Ag  | 10 | 10.34 | 0.82  | 0.082 |
| 154. | LP | ( 2)Se | 7         | /164. | LP*( 6)Ag  | 10 | 45.82 | 0.34  | 0.115 |
| 154. | LP | ( 2)Se | 7         | /165. | LP*( 7)Ag  | 10 | 3.77  | 0.46  | 0.038 |
| 154. | LP | ( 2)Se | 7         | /166. | LP*( 8)Ag  | 10 | 2.81  | 0.46  | 0.033 |
| 154. | LP | ( 2)Se | 7         | /167. | LP*( 9)Ag  | 10 | 9.93  | 0.45  | 0.061 |
| 154. | LP | ( 2)Se | 7         | /458. | RY*( 8)Ag  | 10 | 2.67  | 4.93  | 0.107 |
| 154. | LP | ( 2)Se | 7         | /460. | RY*( 10)Ag | 10 | 1.40  | 2.55  | 0.056 |
| 154. | LP | ( 2)Se | 7         | /463. | RY*( 13)Ag | 10 | 1.19  | 2.67  | 0.053 |
| 154. | LP | ( 2)Se | 7         | /467. | RY*( 17)Ag | 10 | 4.43  | 37.40 | 0.379 |
| 154. | LP | ( 2)Se | 7         | /473. | RY*( 23)Ag | 10 | 1.17  | 2.37  | 0.049 |
| 155. | LP | ( 1)Se | 8         | /164. | LP*( 6)Ag  | 10 | 7.14  | 0.76  | 0.070 |
| 155. | LP | ( 1)Se | 8         | /165. | LP*( 7)Ag  | 10 | 9.66  | 0.88  | 0.083 |
| 155. | LP | ( 1)Se | 8         | /167. | LP*( 9)Ag  | 10 | 4.41  | 0.86  | 0.055 |
| 156. | LP | ( 2)Se | 8         | /164. | LP*( 6)Ag  | 10 | 22.35 | 0.29  | 0.074 |
| 156. | LP | ( 2)Se | 8         | /165. | LP*( 7)Ag  | 10 | 7.29  | 0.41  | 0.049 |
| 156. | LP | ( 2)Se | 8         | /167. | LP*( 9)Ag  | 10 | 3.81  | 0.39  | 0.035 |
| 156. | LP | ( 2)Se | 8         | /458. | RY*( 8)Ag  | 10 | 1.06  | 4.87  | 0.067 |
| 156. | LP | ( 2)Se | 8         | /467. | RY*( 17)Ag | 10 | 1.32  | 37.34 | 0.206 |
| 157. | LP | ( 1)Se | 9         | /164. | LP*( 6)Ag  | 10 | 2.37  | 0.77  | 0.041 |
| 157. | LP | ( 1)Se | 9         | /165. | LP*( 7)Ag  | 10 | 4.89  | 0.89  | 0.060 |
| 168. | LP | ( 1)Se | 11        | /164. | LP*( 6)Ag  | 10 | 1.53  | 0.76  | 0.032 |
| 168. | LP | ( 1)Se | 11        | /166. | LP*( 8)Ag  | 10 | 2.79  | 0.88  | 0.045 |
| 181. | LP | ( 1)Se | 14        | /164. | LP*( 6)Ag  | 10 | 5.15  | 0.77  | 0.060 |
| 181. | LP | ( 1)Se | 14        | /166. | LP*( 8)Ag  | 10 | 9.42  | 0.89  | 0.083 |
| 181. | LP | ( 1)Se | 14        | /167. | LP*( 9)Ag  | 10 | 1.48  | 0.88  | 0.032 |
| 182. | LP | ( 2)Se | 14        | /164. | LP*( 6)Ag  | 10 | 11.47 | 0.26  | 0.050 |
| 182. | LP | ( 2)Se | 14        | /166. | LP*( 8)Ag  | 10 | 5.43  | 0.37  | 0.041 |
| 9.   | BD | ( 1)Se | 7 -Se 9   | /177. | LP*( 6)Ag  | 13 | 1.04  | 0.50  | 0.022 |
| 9.   | BD | ( 1)Se | 7 -Se 9   | /179. | LP*( 8)Ag  | 13 | 2.32  | 0.62  | 0.034 |
| 10.  | BD | ( 1)Se | 7 -Se 11  | /177. | LP*( 6)Ag  | 13 | 1.23  | 0.50  | 0.024 |
| 10.  | BD | ( 1)Se | 7 -Se 11  | /178. | LP*( 7)Ag  | 13 | 2.09  | 0.62  | 0.033 |
| 10.  | BD | ( 1)Se | 7 -Se 11  | /180. | LP*( 9)Ag  | 13 | 1.01  | 0.60  | 0.022 |
| 11.  | BD | ( 1)Se | 8 -Se 9   | /177. | LP*( 6)Ag  | 13 | 1.44  | 0.50  | 0.026 |
| 11.  | BD | ( 1)Se | 8 -Se 9   | /179. | LP*( 8)Ag  | 13 | 3.49  | 0.62  | 0.042 |
| 12.  | BD | ( 1)Se | 8 -Se 12  | /177. | LP*( 6)Ag  | 13 | 2.26  | 0.50  | 0.032 |
| 12.  | BD | ( 1)Se | 8 -Se 12  | /178. | LP*( 7)Ag  | 13 | 1.26  | 0.62  | 0.025 |
| 12.  | BD | ( 1)Se | 8 -Se 12  | /179. | LP*( 8)Ag  | 13 | 2.34  | 0.62  | 0.035 |
| 12.  | BD | ( 1)Se | 8 -Se 12  | /180. | LP*( 9)Ag  | 13 | 1.46  | 0.60  | 0.027 |
| 13.  | BD | ( 1)Se | 11 -Se 14 | /177. | LP*( 6)Ag  | 13 | 2.58  | 0.50  | 0.035 |
| 13.  | BD | ( 1)Se | 11 -Se 14 | /178. | LP*( 7)Ag  | 13 | 4.73  | 0.62  | 0.050 |
| 14.  | BD | ( 1)Se | 12 -Se 14 | /177. | LP*( 6)Ag  | 13 | 3.06  | 0.50  | 0.038 |
| 14.  | BD | ( 1)Se | 12 -Se 14 | /178. | LP*( 7)Ag  | 13 | 3.39  | 0.62  | 0.042 |
| 14.  | BD | ( 1)Se | 12 -Se 14 | /180. | LP*( 9)Ag  | 13 | 1.35  | 0.60  | 0.026 |
| 53.  | CR | ( 3)Se | 8         | /179. | LP*( 8)Ag  | 13 | 1.80  | 10.78 | 0.127 |
| 67.  | CR | ( 3)Se | 9         | /177. | LP*( 6)Ag  | 13 | 2.22  | 10.61 | 0.147 |
| 67.  | CR | ( 3)Se | 9         | /179. | LP*( 8)Ag  | 13 | 5.09  | 10.73 | 0.213 |
| 85.  | CR | ( 3)Se | 11        | /177. | LP*( 6)Ag  | 13 | 3.50  | 10.66 | 0.186 |
| 85.  | CR | ( 3)Se | 11        | /178. | LP*( 7)Ag  | 13 | 5.85  | 10.78 | 0.230 |
| 85.  | CR | ( 3)Se | 11        | /180. | LP*( 9)Ag  | 13 | 2.17  | 10.76 | 0.138 |
| 99.  | CR | ( 3)Se | 12        | /177. | LP*( 6)Ag  | 13 | 5.89  | 10.72 | 0.241 |
| 99.  | CR | ( 3)Se | 12        | /178. | LP*( 7)Ag  | 13 | 3.07  | 10.84 | 0.167 |
| 99.  | CR | ( 3)Se | 12        | /179. | LP*( 8)Ag  | 13 | 2.09  | 10.83 | 0.137 |
| 99.  | CR | ( 3)Se | 12        | /180. | LP*( 9)Ag  | 13 | 5.45  | 10.82 | 0.219 |
| 117. | CR | ( 3)Se | 14        | /177. | LP*( 6)Ag  | 13 | 1.26  | 10.61 | 0.111 |
| 117. | CR | ( 3)Se | 14        | /178. | LP*( 7)Ag  | 13 | 2.98  | 10.73 | 0.164 |
| 155. | LP | ( 1)Se | 8         | /177. | LP*( 6)Ag  | 13 | 1.53  | 0.76  | 0.032 |
| 155. | LP | ( 1)Se | 8         | /179. | LP*( 8)Ag  | 13 | 2.81  | 0.88  | 0.045 |
| 157. | LP | ( 1)Se | 9         | /177. | LP*( 6)Ag  | 13 | 5.16  | 0.77  | 0.060 |
| 157. | LP | ( 1)Se | 9         | /179. | LP*( 8)Ag  | 13 | 9.38  | 0.89  | 0.083 |
| 157. | LP | ( 1)Se | 9         | /180. | LP*( 9)Ag  | 13 | 1.53  | 0.88  | 0.033 |
| 158. | LP | ( 2)Se | 9         | /177. | LP*( 6)Ag  | 13 | 11.53 | 0.26  | 0.050 |
| 158. | LP | ( 2)Se | 9         | /179. | LP*( 8)Ag  | 13 | 5.42  | 0.37  | 0.041 |
| 168. | LP | ( 1)Se | 11        | /177. | LP*( 6)Ag  | 13 | 7.07  | 0.76  | 0.070 |
| 168. | LP | ( 1)Se | 11        | /178. | LP*( 7)Ag  | 13 | 9.65  | 0.88  | 0.083 |
| 168. | LP | ( 1)Se | 11        | /180. | LP*( 9)Ag  | 13 | 4.30  | 0.86  | 0.054 |
| 169. | LP | ( 2)Se | 11        | /177. | LP*( 6)Ag  | 13 | 21.90 | 0.28  | 0.073 |
| 169. | LP | ( 2)Se | 11        | /178. | LP*( 7)Ag  | 13 | 7.21  | 0.40  | 0.049 |
| 169. | LP | ( 2)Se | 11        | /180. | LP*( 9)Ag  | 13 | 3.68  | 0.39  | 0.035 |
| 169. | LP | ( 2)Se | 11        | /561. | RY*( 8)Ag  | 13 | 1.04  | 4.88  | 0.066 |
| 169. | LP | ( 2)Se | 11        | /570. | RY*( 17)Ag | 13 | 1.28  | 37.26 | 0.202 |

|                         |                           |       |       |       |
|-------------------------|---------------------------|-------|-------|-------|
| 170. LP ( 1)Se 12       | /177. LP*( 6)Ag 13        | 9.43  | 0.72  | 0.078 |
| 170. LP ( 1)Se 12       | /178. LP*( 7)Ag 13        | 4.04  | 0.84  | 0.053 |
| 170. LP ( 1)Se 12       | /179. LP*( 8)Ag 13        | 2.48  | 0.84  | 0.041 |
| 170. LP ( 1)Se 12       | /180. LP*( 9)Ag 13        | 10.36 | 0.82  | 0.082 |
| 171. LP ( 2)Se 12       | /177. LP*( 6)Ag 13        | 46.05 | 0.34  | 0.116 |
| 171. LP ( 2)Se 12       | /178. LP*( 7)Ag 13        | 3.72  | 0.46  | 0.038 |
| 171. LP ( 2)Se 12       | /179. LP*( 8)Ag 13        | 2.84  | 0.46  | 0.033 |
| 171. LP ( 2)Se 12       | /180. LP*( 9)Ag 13        | 10.00 | 0.45  | 0.062 |
| 171. LP ( 2)Se 12       | /561. RY*( 8)Ag 13        | 2.70  | 4.94  | 0.108 |
| 171. LP ( 2)Se 12       | /563. RY*( 10)Ag 13       | 1.35  | 2.51  | 0.054 |
| 171. LP ( 2)Se 12       | /566. RY*( 13)Ag 13       | 1.18  | 2.65  | 0.052 |
| 171. LP ( 2)Se 12       | /570. RY*( 17)Ag 13       | 4.49  | 37.32 | 0.381 |
| 171. LP ( 2)Se 12       | /576. RY*( 23)Ag 13       | 1.17  | 2.37  | 0.049 |
| 181. LP ( 1)Se 14       | /177. LP*( 6)Ag 13        | 2.36  | 0.77  | 0.041 |
| 181. LP ( 1)Se 14       | /178. LP*( 7)Ag 13        | 4.84  | 0.89  | 0.060 |
| 164. LP*( 6)Ag 10       | /364. RY*( 4)Se 7         | 1.12  | 0.53  | 0.058 |
| 164. LP*( 6)Ag 10       | /365. RY*( 5)Se 7         | 1.05  | 0.55  | 0.057 |
| 164. LP*( 6)Ag 10       | /368. RY*( 8)Se 7         | 2.15  | 0.88  | 0.105 |
| 164. LP*( 6)Ag 10       | /165. LP*( 7)Ag 10        | 1.22  | 0.12  | 0.025 |
| 164. LP*( 6)Ag 10       | /456. RY*( 6)Ag 10        | 1.43  | 1.44  | 0.109 |
| 164. LP*( 6)Ag 10       | /458. RY*( 8)Ag 10        | 4.48  | 4.59  | 0.345 |
| 164. LP*( 6)Ag 10       | /460. RY*( 10)Ag 10       | 2.06  | 2.21  | 0.162 |
| 164. LP*( 6)Ag 10       | /462. RY*( 12)Ag 10       | 1.09  | 1.48  | 0.096 |
| 164. LP*( 6)Ag 10       | /463. RY*( 13)Ag 10       | 1.92  | 2.32  | 0.161 |
| 164. LP*( 6)Ag 10       | /467. RY*( 17)Ag 10       | 5.45  | 37.06 | 1.081 |
| 164. LP*( 6)Ag 10       | /471. RY*( 21)Ag 10       | 1.00  | 1.85  | 0.104 |
| 164. LP*( 6)Ag 10       | /473. RY*( 23)Ag 10       | 1.90  | 2.03  | 0.150 |
| 164. LP*( 6)Ag 10       | /178. LP*( 7)Ag 13        | 1.84  | 0.12  | 0.031 |
| 164. LP*( 6)Ag 10       | /179. LP*( 8)Ag 13        | 1.66  | 0.12  | 0.029 |
| 177. LP*( 6)Ag 13       | /527. RY*( 4)Se 12        | 1.12  | 0.53  | 0.058 |
| 177. LP*( 6)Ag 13       | /528. RY*( 5)Se 12        | 1.06  | 0.55  | 0.058 |
| 177. LP*( 6)Ag 13       | /531. RY*( 8)Se 12        | 2.17  | 0.88  | 0.105 |
| 177. LP*( 6)Ag 13       | /165. LP*( 7)Ag 10        | 1.86  | 0.12  | 0.031 |
| 177. LP*( 6)Ag 13       | /166. LP*( 8)Ag 10        | 1.66  | 0.12  | 0.029 |
| 177. LP*( 6)Ag 13       | /178. LP*( 7)Ag 13        | 1.18  | 0.12  | 0.025 |
| 177. LP*( 6)Ag 13       | /559. RY*( 6)Ag 13        | 1.45  | 1.45  | 0.110 |
| 177. LP*( 6)Ag 13       | /561. RY*( 8)Ag 13        | 4.48  | 4.59  | 0.346 |
| 177. LP*( 6)Ag 13       | /563. RY*( 10)Ag 13       | 1.97  | 2.17  | 0.158 |
| 177. LP*( 6)Ag 13       | /565. RY*( 12)Ag 13       | 1.18  | 1.50  | 0.101 |
| 177. LP*( 6)Ag 13       | /566. RY*( 13)Ag 13       | 1.89  | 2.31  | 0.159 |
| 177. LP*( 6)Ag 13       | /570. RY*( 17)Ag 13       | 5.46  | 36.98 | 1.082 |
| 177. LP*( 6)Ag 13       | /574. RY*( 21)Ag 13       | 1.02  | 1.86  | 0.105 |
| 177. LP*( 6)Ag 13       | /576. RY*( 23)Ag 13       | 1.88  | 2.02  | 0.148 |
| 15. BD ( 1) O 15 - S 17 | /178. LP*( 7)Ag 13        | 2.88  | 0.89  | 0.046 |
| 16. BD ( 2) O 15 - S 17 | /178. LP*( 7)Ag 13        | 1.15  | 0.60  | 0.024 |
| 20. BD ( 2) S 17 - O 19 | /178. LP*( 7)Ag 13        | 1.27  | 1.07  | 0.034 |
| 129. CR ( 1) O 15       | /178. LP*( 7)Ag 13        | 2.24  | 19.14 | 0.190 |
| 132. CR ( 2) S 17       | /178. LP*( 7)Ag 13        | 4.18  | 9.39  | 0.181 |
| 183. LP ( 1) O 15       | /177. LP*( 6)Ag 13        | 6.00  | 0.82  | 0.066 |
| 183. LP ( 1) O 15       | /178. LP*( 7)Ag 13        | 12.69 | 0.94  | 0.099 |
| 183. LP ( 1) O 15       | /179. LP*( 8)Ag 13        | 1.64  | 0.93  | 0.035 |
| 183. LP ( 1) O 15       | /180. LP*( 9)Ag 13        | 1.36  | 0.92  | 0.032 |
| 184. LP ( 2) O 15       | /177. LP*( 6)Ag 13        | 5.26  | 0.33  | 0.039 |
| 184. LP ( 2) O 15       | /178. LP*( 7)Ag 13        | 2.77  | 0.45  | 0.032 |
| 187. LP ( 1) S 17       | /177. LP*( 6)Ag 13        | 1.01  | 0.61  | 0.024 |
| 187. LP ( 1) S 17       | /178. LP*( 7)Ag 13        | 9.33  | 0.73  | 0.075 |
| 189. LP ( 1) O 19       | /178. LP*( 7)Ag 13        | 2.76  | 0.93  | 0.046 |
| 15. BD ( 1) O 15 - S 17 | /744. RY*( 2) O 19        | 1.25  | 1.95  | 0.045 |
| 15. BD ( 1) O 15 - S 17 | /760. RY*( 18) O 19       | 1.14  | 2.28  | 0.046 |
| 15. BD ( 1) O 15 - S 17 | /810. BD*( 2) O 15 - S 17 | 22.37 | 1.09  | 0.143 |
| 15. BD ( 1) O 15 - S 17 | /813. BD*( 1) S 17 - O 19 | 20.43 | 1.07  | 0.135 |
| 16. BD ( 2) O 15 - S 17 | /744. RY*( 2) O 19        | 2.59  | 1.67  | 0.060 |
| 16. BD ( 2) O 15 - S 17 | /760. RY*( 18) O 19       | 2.44  | 2.00  | 0.064 |
| 16. BD ( 2) O 15 - S 17 | /809. BD*( 1) O 15 - S 17 | 19.49 | 0.83  | 0.114 |
| 16. BD ( 2) O 15 - S 17 | /810. BD*( 2) O 15 - S 17 | 2.08  | 0.81  | 0.037 |
| 16. BD ( 2) O 15 - S 17 | /813. BD*( 1) S 17 - O 19 | 47.38 | 0.78  | 0.173 |
| 16. BD ( 2) O 15 - S 17 | /814. BD*( 2) S 17 - O 19 | 1.90  | 0.88  | 0.037 |
| 19. BD ( 1) S 17 - O 19 | /629. RY*( 3) O 15        | 2.52  | 1.20  | 0.051 |
| 19. BD ( 1) S 17 - O 19 | /633. RY*( 7) O 15        | 1.74  | 2.14  | 0.057 |
| 19. BD ( 1) S 17 - O 19 | /744. RY*( 2) O 19        | 1.48  | 1.52  | 0.044 |
| 19. BD ( 1) S 17 - O 19 | /760. RY*( 18) O 19       | 1.32  | 1.85  | 0.046 |
| 19. BD ( 1) S 17 - O 19 | /809. BD*( 1) O 15 - S 17 | 20.52 | 0.68  | 0.106 |
| 19. BD ( 1) S 17 - O 19 | /810. BD*( 2) O 15 - S 17 | 60.61 | 0.66  | 0.179 |
| 19. BD ( 1) S 17 - O 19 | /813. BD*( 1) S 17 - O 19 | 16.34 | 0.63  | 0.091 |
| 19. BD ( 1) S 17 - O 19 | /814. BD*( 2) S 17 - O 19 | 1.20  | 0.73  | 0.027 |
| 20. BD ( 2) S 17 - O 19 | /810. BD*( 2) O 15 - S 17 | 3.15  | 1.27  | 0.059 |
| 20. BD ( 2) S 17 - O 19 | /813. BD*( 1) S 17 - O 19 | 1.33  | 1.25  | 0.038 |
| 141. CR ( 1) O 19       | /680. RY*( 2) S 17        | 1.25  | 19.92 | 0.142 |
| 141. CR ( 1) O 19       | /681. RY*( 3) S 17        | 1.01  | 20.65 | 0.129 |
| 183. LP ( 1) O 15       | /682. RY*( 4) S 17        | 3.20  | 2.36  | 0.079 |
| 183. LP ( 1) O 15       | /814. BD*( 2) S 17 - O 19 | 1.53  | 1.21  | 0.039 |
| 184. LP ( 2) O 15       | /679. RY*( 1) S 17        | 11.32 | 1.03  | 0.098 |

|      |     |       |   |           |       |           |    |           |        |       |       |
|------|-----|-------|---|-----------|-------|-----------|----|-----------|--------|-------|-------|
| 184. | LP  | ( 2 ) | O | 15        | /680. | RY*( 2 )  | S  | 17        | 3.47   | 1.27  | 0.061 |
| 184. | LP  | ( 2 ) | O | 15        | /814. | BD*( 2 )  | S  | 17 - O 19 | 17.64  | 0.73  | 0.103 |
| 189. | LP  | ( 1 ) | O | 19        | /681. | RY*( 3 )  | S  | 17        | 4.26   | 2.47  | 0.092 |
| 190. | LP  | ( 2 ) | O | 19        | /679. | RY*( 1 )  | S  | 17        | 20.36  | 0.99  | 0.130 |
| 190. | LP  | ( 2 ) | O | 19        | /809. | BD*( 1 )  | O  | 15 - S 17 | 19.51  | 0.64  | 0.101 |
| 190. | LP  | ( 2 ) | O | 19        | /810. | BD*( 2 )  | O  | 15 - S 17 | 7.84   | 0.62  | 0.062 |
| 809. | BD* | ( 1 ) | O | 15 - S 17 | /630. | RY*( 4 )  | O  | 15        | 1.03   | 1.10  | 0.116 |
| 809. | BD* | ( 1 ) | O | 15 - S 17 | /679. | RY*( 1 )  | S  | 17        | 10.21  | 0.36  | 0.167 |
| 809. | BD* | ( 1 ) | O | 15 - S 17 | /680. | RY*( 2 )  | S  | 17        | 9.02   | 0.59  | 0.226 |
| 809. | BD* | ( 1 ) | O | 15 - S 17 | /814. | BD*( 2 )  | S  | 17 - O 19 | 1.53   | 0.06  | 0.025 |
| 810. | BD* | ( 2 ) | O | 15 - S 17 | /629. | RY*( 3 )  | O  | 15        | 1.78   | 0.54  | 0.096 |
| 810. | BD* | ( 2 ) | O | 15 - S 17 | /633. | RY*( 7 )  | O  | 15        | 1.27   | 1.48  | 0.135 |
| 810. | BD* | ( 2 ) | O | 15 - S 17 | /679. | RY*( 1 )  | S  | 17        | 4.10   | 0.38  | 0.102 |
| 810. | BD* | ( 2 ) | O | 15 - S 17 | /680. | RY*( 2 )  | S  | 17        | 3.64   | 0.62  | 0.134 |
| 810. | BD* | ( 2 ) | O | 15 - S 17 | /684. | RY*( 6 )  | S  | 17        | 1.06   | 0.77  | 0.089 |
| 810. | BD* | ( 2 ) | O | 15 - S 17 | /744. | RY*( 2 )  | O  | 19        | 1.77   | 0.86  | 0.121 |
| 810. | BD* | ( 2 ) | O | 15 - S 17 | /760. | RY*( 18 ) | O  | 19        | 1.40   | 1.19  | 0.127 |
| 810. | BD* | ( 2 ) | O | 15 - S 17 | /809. | BD*( 1 )  | O  | 15 - S 17 | 1.60   | 0.02  | 0.013 |
| 810. | BD* | ( 2 ) | O | 15 - S 17 | /814. | BD*( 2 )  | S  | 17 - O 19 | 8.75   | 0.08  | 0.065 |
| 813. | BD* | ( 1 ) | S | 17 - O 19 | /629. | RY*( 3 )  | O  | 15        | 1.34   | 0.56  | 0.094 |
| 813. | BD* | ( 1 ) | S | 17 - O 19 | /704. | RY*( 26 ) | S  | 17        | 1.07   | 2.00  | 0.158 |
| 813. | BD* | ( 1 ) | S | 17 - O 19 | /744. | RY*( 2 )  | O  | 19        | 1.77   | 0.88  | 0.135 |
| 813. | BD* | ( 1 ) | S | 17 - O 19 | /760. | RY*( 18 ) | O  | 19        | 3.39   | 1.21  | 0.219 |
| 813. | BD* | ( 1 ) | S | 17 - O 19 | /809. | BD*( 1 )  | O  | 15 - S 17 | 127.29 | 0.04  | 0.181 |
| 813. | BD* | ( 1 ) | S | 17 - O 19 | /810. | BD*( 2 )  | O  | 15 - S 17 | 745.75 | 0.02  | 0.303 |
| 17.  | BD  | ( 1 ) | O | 16 - S 18 | /179. | LP*( 8 )  | Ag | 13        | 3.35   | 0.83  | 0.047 |
| 18.  | BD  | ( 2 ) | O | 16 - S 18 | /179. | LP*( 8 )  | Ag | 13        | 1.79   | 0.66  | 0.031 |
| 130. | CR  | ( 1 ) | O | 16        | /179. | LP*( 8 )  | Ag | 13        | 2.27   | 19.13 | 0.190 |
| 137. | CR  | ( 2 ) | S | 18        | /179. | LP*( 8 )  | Ag | 13        | 3.13   | 9.38  | 0.156 |
| 185. | LP  | ( 1 ) | O | 16        | /177. | LP*( 6 )  | Ag | 13        | 4.55   | 0.82  | 0.058 |
| 185. | LP  | ( 1 ) | O | 16        | /179. | LP*( 8 )  | Ag | 13        | 14.86  | 0.93  | 0.106 |
| 186. | LP  | ( 2 ) | O | 16        | /177. | LP*( 6 )  | Ag | 13        | 3.04   | 0.32  | 0.029 |
| 186. | LP  | ( 2 ) | O | 16        | /179. | LP*( 8 )  | Ag | 13        | 1.75   | 0.44  | 0.025 |
| 188. | LP  | ( 1 ) | S | 18        | /177. | LP*( 6 )  | Ag | 13        | 1.16   | 0.61  | 0.025 |
| 188. | LP  | ( 1 ) | S | 18        | /179. | LP*( 8 )  | Ag | 13        | 7.01   | 0.73  | 0.065 |
| 191. | LP  | ( 1 ) | O | 20        | /178. | LP*( 7 )  | Ag | 13        | 1.04   | 0.93  | 0.028 |
| 191. | LP  | ( 1 ) | O | 20        | /179. | LP*( 8 )  | Ag | 13        | 1.30   | 0.93  | 0.032 |
| 17.  | BD  | ( 1 ) | O | 16 - S 18 | /771. | RY*( 3 )  | O  | 20        | 1.00   | 1.85  | 0.039 |
| 17.  | BD  | ( 1 ) | O | 16 - S 18 | /812. | BD*( 2 )  | O  | 16 - S 18 | 24.46  | 1.04  | 0.145 |
| 17.  | BD  | ( 1 ) | O | 16 - S 18 | /815. | BD*( 1 )  | S  | 18 - O 20 | 27.70  | 1.01  | 0.152 |
| 18.  | BD  | ( 2 ) | O | 16 - S 18 | /771. | RY*( 3 )  | O  | 20        | 2.49   | 1.68  | 0.059 |
| 18.  | BD  | ( 2 ) | O | 16 - S 18 | /811. | BD*( 1 )  | O  | 16 - S 18 | 22.91  | 0.88  | 0.128 |
| 18.  | BD  | ( 2 ) | O | 16 - S 18 | /812. | BD*( 2 )  | O  | 16 - S 18 | 1.00   | 0.87  | 0.026 |
| 18.  | BD  | ( 2 ) | O | 16 - S 18 | /815. | BD*( 1 )  | S  | 18 - O 20 | 40.50  | 0.84  | 0.166 |
| 18.  | BD  | ( 2 ) | O | 16 - S 18 | /816. | BD*( 2 )  | S  | 18 - O 20 | 3.53   | 0.92  | 0.051 |
| 21.  | BD  | ( 1 ) | S | 18 - O 20 | /655. | RY*( 3 )  | O  | 16        | 2.65   | 1.31  | 0.055 |
| 21.  | BD  | ( 1 ) | S | 18 - O 20 | /659. | RY*( 7 )  | O  | 16        | 1.02   | 2.37  | 0.046 |
| 21.  | BD  | ( 1 ) | S | 18 - O 20 | /660. | RY*( 8 )  | O  | 16        | 1.12   | 2.26  | 0.047 |
| 21.  | BD  | ( 1 ) | S | 18 - O 20 | /666. | RY*( 14 ) | O  | 16        | 1.21   | 2.11  | 0.047 |
| 21.  | BD  | ( 1 ) | S | 18 - O 20 | /739. | RY*( 29 ) | S  | 18        | 1.24   | 2.64  | 0.053 |
| 21.  | BD  | ( 1 ) | S | 18 - O 20 | /771. | RY*( 3 )  | O  | 20        | 1.29   | 1.49  | 0.041 |
| 21.  | BD  | ( 1 ) | S | 18 - O 20 | /811. | BD*( 1 )  | O  | 16 - S 18 | 27.56  | 0.69  | 0.124 |
| 21.  | BD  | ( 1 ) | S | 18 - O 20 | /812. | BD*( 2 )  | O  | 16 - S 18 | 45.46  | 0.68  | 0.157 |
| 21.  | BD  | ( 1 ) | S | 18 - O 20 | /815. | BD*( 1 )  | S  | 18 - O 20 | 13.51  | 0.65  | 0.084 |
| 21.  | BD  | ( 1 ) | S | 18 - O 20 | /816. | BD*( 2 )  | S  | 18 - O 20 | 2.90   | 0.73  | 0.042 |
| 22.  | BD  | ( 2 ) | S | 18 - O 20 | /812. | BD*( 2 )  | O  | 16 - S 18 | 5.04   | 1.26  | 0.074 |
| 22.  | BD  | ( 2 ) | S | 18 - O 20 | /815. | BD*( 1 )  | S  | 18 - O 20 | 3.27   | 1.23  | 0.059 |
| 142. | CR  | ( 1 ) | O | 20        | /712. | RY*( 2 )  | S  | 18        | 1.17   | 19.93 | 0.138 |
| 185. | LP  | ( 1 ) | O | 16        | /714. | RY*( 4 )  | S  | 18        | 3.34   | 2.36  | 0.080 |
| 185. | LP  | ( 1 ) | O | 16        | /816. | BD*( 2 )  | S  | 18 - O 20 | 1.08   | 1.20  | 0.033 |
| 186. | LP  | ( 2 ) | O | 16        | /711. | RY*( 1 )  | S  | 18        | 13.21  | 1.00  | 0.105 |
| 186. | LP  | ( 2 ) | O | 16        | /712. | RY*( 2 )  | S  | 18        | 3.03   | 1.26  | 0.057 |
| 186. | LP  | ( 2 ) | O | 16        | /815. | BD*( 1 )  | S  | 18 - O 20 | 1.00   | 0.62  | 0.022 |
| 186. | LP  | ( 2 ) | O | 16        | /816. | BD*( 2 )  | S  | 18 - O 20 | 19.20  | 0.70  | 0.105 |
| 191. | LP  | ( 1 ) | O | 20        | /713. | RY*( 3 )  | S  | 18        | 4.39   | 2.59  | 0.095 |
| 192. | LP  | ( 2 ) | O | 20        | /711. | RY*( 1 )  | S  | 18        | 18.91  | 0.99  | 0.125 |
| 192. | LP  | ( 2 ) | O | 20        | /712. | RY*( 2 )  | S  | 18        | 1.28   | 1.24  | 0.037 |
| 192. | LP  | ( 2 ) | O | 20        | /811. | BD*( 1 )  | O  | 16 - S 18 | 16.55  | 0.64  | 0.093 |
| 192. | LP  | ( 2 ) | O | 20        | /812. | BD*( 2 )  | O  | 16 - S 18 | 10.06  | 0.63  | 0.071 |
| 811. | BD* | ( 1 ) | O | 16 - S 18 | /711. | RY*( 1 )  | S  | 18        | 7.47   | 0.34  | 0.140 |
| 811. | BD* | ( 1 ) | O | 16 - S 18 | /712. | RY*( 2 )  | S  | 18        | 9.02   | 0.60  | 0.225 |
| 812. | BD* | ( 2 ) | O | 16 - S 18 | /655. | RY*( 3 )  | O  | 16        | 1.35   | 0.63  | 0.094 |
| 812. | BD* | ( 2 ) | O | 16 - S 18 | /666. | RY*( 14 ) | O  | 16        | 1.07   | 1.43  | 0.126 |
| 812. | BD* | ( 2 ) | O | 16 - S 18 | /711. | RY*( 1 )  | S  | 18        | 4.49   | 0.36  | 0.107 |
| 812. | BD* | ( 2 ) | O | 16 - S 18 | /712. | RY*( 2 )  | S  | 18        | 5.40   | 0.61  | 0.168 |
| 812. | BD* | ( 2 ) | O | 16 - S 18 | /716. | RY*( 6 )  | S  | 18        | 2.06   | 0.31  | 0.081 |
| 812. | BD* | ( 2 ) | O | 16 - S 18 | /739. | RY*( 29 ) | S  | 18        | 1.17   | 1.96  | 0.155 |
| 812. | BD* | ( 2 ) | O | 16 - S 18 | /771. | RY*( 3 )  | O  | 20        | 1.26   | 0.82  | 0.103 |
| 812. | BD* | ( 2 ) | O | 16 - S 18 | /811. | BD*( 1 )  | O  | 16 - S 18 | 4.93   | 0.02  | 0.021 |
| 812. | BD* | ( 2 ) | O | 16 - S 18 | /816. | BD*( 2 )  | S  | 18 - O 20 | 19.73  | 0.06  | 0.085 |
| 815. | BD* | ( 1 ) | S | 18 - O 20 | /655. | RY*( 3 )  | O  | 16        | 1.49   | 0.65  | 0.104 |
| 815. | BD* | ( 1 ) | S | 18 - O 20 | /716. | RY*( 6 )  | S  | 18        | 1.82   | 0.33  | 0.082 |

|                          |                           |        |      |       |
|--------------------------|---------------------------|--------|------|-------|
| 815. BD*( 1) S 18 - O 20 | /739. RY*( 29) S 18       | 1.12   | 1.99 | 0.157 |
| 815. BD*( 1) S 18 - O 20 | /771. RY*( 3) O 20        | 1.40   | 0.84 | 0.114 |
| 815. BD*( 1) S 18 - O 20 | /811. BD*( 1) O 16 - S 18 | 192.20 | 0.04 | 0.213 |
| 815. BD*( 1) S 18 - O 20 | /812. BD*( 2) O 16 - S 18 | 545.80 | 0.03 | 0.272 |

Wiberg bond index matrix in the NAO basis:

| Atom   | 1      | 2      | 3      | 4      | 5      | 6      | 7      | 8      | 9      |
|--------|--------|--------|--------|--------|--------|--------|--------|--------|--------|
| 1. S   | 0.0000 | 0.0004 | 1.3929 | 1.6238 | 0.0010 | 0.0002 | 0.0010 | 0.0007 | 0.0004 |
| 2. S   | 0.0004 | 0.0000 | 0.0008 | 0.0002 | 1.4421 | 1.5780 | 0.0016 | 0.0021 | 0.0008 |
| 3. O   | 1.3929 | 0.0008 | 0.0000 | 0.2599 | 0.0016 | 0.0002 | 0.0032 | 0.0017 | 0.0007 |
| 4. O   | 1.6238 | 0.0002 | 0.2599 | 0.0000 | 0.0003 | 0.0001 | 0.0006 | 0.0003 | 0.0002 |
| 5. O   | 0.0010 | 1.4421 | 0.0016 | 0.0003 | 0.0000 | 0.2608 | 0.0021 | 0.0022 | 0.0009 |
| 6. O   | 0.0002 | 1.5780 | 0.0002 | 0.0001 | 0.2608 | 0.0000 | 0.0007 | 0.0064 | 0.0008 |
| 7. Se  | 0.0010 | 0.0016 | 0.0032 | 0.0006 | 0.0021 | 0.0007 | 0.0000 | 0.0788 | 0.9967 |
| 8. Se  | 0.0007 | 0.0021 | 0.0017 | 0.0003 | 0.0022 | 0.0064 | 0.0788 | 0.0000 | 1.0253 |
| 9. Se  | 0.0004 | 0.0008 | 0.0007 | 0.0002 | 0.0009 | 0.0008 | 0.9967 | 1.0253 | 0.0000 |
| 10. Ag | 0.0623 | 0.0487 | 0.1236 | 0.0357 | 0.1018 | 0.0270 | 0.2429 | 0.1589 | 0.0306 |
| 11. Se | 0.0002 | 0.0003 | 0.0004 | 0.0002 | 0.0007 | 0.0002 | 0.9753 | 0.0142 | 0.0875 |
| 12. Se | 0.0001 | 0.0012 | 0.0003 | 0.0001 | 0.0009 | 0.0046 | 0.0143 | 0.9747 | 0.0819 |
| 13. Ag | 0.0001 | 0.0001 | 0.0002 | 0.0000 | 0.0002 | 0.0001 | 0.0162 | 0.0255 | 0.1179 |
| 14. Se | 0.0009 | 0.0006 | 0.0015 | 0.0005 | 0.0016 | 0.0004 | 0.0819 | 0.0875 | 0.0148 |
| 15. O  | 0.0000 | 0.0000 | 0.0000 | 0.0000 | 0.0000 | 0.0000 | 0.0003 | 0.0004 | 0.0015 |
| 16. O  | 0.0000 | 0.0000 | 0.0000 | 0.0000 | 0.0000 | 0.0000 | 0.0009 | 0.0007 | 0.0016 |
| 17. S  | 0.0000 | 0.0000 | 0.0000 | 0.0000 | 0.0000 | 0.0000 | 0.0001 | 0.0002 | 0.0009 |
| 18. S  | 0.0000 | 0.0000 | 0.0000 | 0.0000 | 0.0000 | 0.0000 | 0.0012 | 0.0003 | 0.0006 |
| 19. O  | 0.0000 | 0.0000 | 0.0000 | 0.0000 | 0.0000 | 0.0000 | 0.0001 | 0.0002 | 0.0005 |
| 20. O  | 0.0000 | 0.0000 | 0.0000 | 0.0000 | 0.0000 | 0.0000 | 0.0046 | 0.0002 | 0.0004 |

| Atom   | 10     | 11     | 12     | 13     | 14     | 15     | 16     | 17     | 18     |
|--------|--------|--------|--------|--------|--------|--------|--------|--------|--------|
| 1. S   | 0.0623 | 0.0002 | 0.0001 | 0.0001 | 0.0009 | 0.0000 | 0.0000 | 0.0000 | 0.0000 |
| 2. S   | 0.0487 | 0.0003 | 0.0012 | 0.0001 | 0.0006 | 0.0000 | 0.0000 | 0.0000 | 0.0000 |
| 3. O   | 0.1236 | 0.0004 | 0.0003 | 0.0002 | 0.0015 | 0.0000 | 0.0000 | 0.0000 | 0.0000 |
| 4. O   | 0.0357 | 0.0002 | 0.0001 | 0.0000 | 0.0005 | 0.0000 | 0.0000 | 0.0000 | 0.0000 |
| 5. O   | 0.1018 | 0.0007 | 0.0009 | 0.0002 | 0.0016 | 0.0000 | 0.0000 | 0.0000 | 0.0000 |
| 6. O   | 0.0270 | 0.0002 | 0.0046 | 0.0001 | 0.0004 | 0.0000 | 0.0000 | 0.0000 | 0.0000 |
| 7. Se  | 0.2429 | 0.9753 | 0.0143 | 0.0162 | 0.0819 | 0.0003 | 0.0009 | 0.0001 | 0.0012 |
| 8. Se  | 0.1589 | 0.0142 | 0.9747 | 0.0255 | 0.0875 | 0.0004 | 0.0007 | 0.0002 | 0.0003 |
| 9. Se  | 0.0306 | 0.0875 | 0.0819 | 0.1179 | 0.0148 | 0.0015 | 0.0016 | 0.0009 | 0.0006 |
| 10. Ag | 0.0000 | 0.0255 | 0.0163 | 0.0164 | 0.1177 | 0.0002 | 0.0002 | 0.0001 | 0.0001 |
| 11. Se | 0.0255 | 0.0000 | 0.0789 | 0.1573 | 1.0257 | 0.0017 | 0.0022 | 0.0007 | 0.0021 |
| 12. Se | 0.0163 | 0.0789 | 0.0000 | 0.2435 | 0.9965 | 0.0032 | 0.0021 | 0.0010 | 0.0016 |
| 13. Ag | 0.0164 | 0.1573 | 0.2435 | 0.0000 | 0.0306 | 0.1235 | 0.1019 | 0.0621 | 0.0487 |
| 14. Se | 0.1177 | 1.0257 | 0.9965 | 0.0306 | 0.0000 | 0.0007 | 0.0009 | 0.0004 | 0.0008 |
| 15. O  | 0.0002 | 0.0017 | 0.0032 | 0.1235 | 0.0007 | 0.0000 | 0.0016 | 1.3923 | 0.0008 |
| 16. O  | 0.0002 | 0.0022 | 0.0021 | 0.1019 | 0.0009 | 0.0016 | 0.0000 | 0.0010 | 1.4416 |
| 17. S  | 0.0001 | 0.0007 | 0.0010 | 0.0621 | 0.0004 | 1.3923 | 0.0010 | 0.0000 | 0.0004 |
| 18. S  | 0.0001 | 0.0021 | 0.0016 | 0.0487 | 0.0008 | 0.0008 | 1.4416 | 0.0004 | 0.0000 |
| 19. O  | 0.0000 | 0.0003 | 0.0006 | 0.0354 | 0.0002 | 0.2599 | 0.0003 | 1.6244 | 0.0002 |
| 20. O  | 0.0001 | 0.0065 | 0.0007 | 0.0269 | 0.0008 | 0.0002 | 0.2608 | 0.0002 | 1.5784 |

| Atom   | 19     | 20     |
|--------|--------|--------|
| 1. S   | 0.0000 | 0.0000 |
| 2. S   | 0.0000 | 0.0000 |
| 3. O   | 0.0000 | 0.0000 |
| 4. O   | 0.0000 | 0.0000 |
| 5. O   | 0.0000 | 0.0000 |
| 6. O   | 0.0000 | 0.0000 |
| 7. Se  | 0.0001 | 0.0046 |
| 8. Se  | 0.0002 | 0.0002 |
| 9. Se  | 0.0005 | 0.0004 |
| 10. Ag | 0.0000 | 0.0001 |
| 11. Se | 0.0003 | 0.0065 |
| 12. Se | 0.0006 | 0.0007 |
| 13. Ag | 0.0354 | 0.0269 |
| 14. Se | 0.0002 | 0.0008 |
| 15. O  | 0.2599 | 0.0002 |
| 16. O  | 0.0003 | 0.2608 |
| 17. S  | 1.6244 | 0.0002 |
| 18. S  | 0.0002 | 1.5784 |
| 19. O  | 0.0000 | 0.0001 |
| 20. O  | 0.0001 | 0.0000 |

Summary of Natural Population Analysis:

| Atom No | Natural Population |         |         |         | Total    |
|---------|--------------------|---------|---------|---------|----------|
|         | Natural Charge     | Core    | Valence | Rydberg |          |
| 1 s     | 1.69542            | 9.99909 | 4.10197 | 0.20351 | 14.30458 |

|           |    |          |           |           |         |           |
|-----------|----|----------|-----------|-----------|---------|-----------|
| 2         | s  | 1.69233  | 9.99912   | 4.10234   | 0.20621 | 14.30767  |
| 3         | o  | -0.89705 | 1.99985   | 6.86011   | 0.03709 | 8.89705   |
| 4         | o  | -0.74612 | 1.99986   | 6.70412   | 0.04214 | 8.74612   |
| 5         | o  | -0.87223 | 1.99985   | 6.83418   | 0.03820 | 8.87223   |
| 6         | o  | -0.77970 | 1.99985   | 6.73882   | 0.04103 | 8.77970   |
| 7         | se | 0.00768  | 27.99925  | 5.92985   | 0.06322 | 33.99232  |
| 8         | se | 0.06673  | 27.99926  | 5.87834   | 0.05566 | 33.93327  |
| 9         | se | 0.08248  | 27.99926  | 5.86761   | 0.05065 | 33.91752  |
| 10        | ag | 0.74998  | 7.99893   | 10.22510  | 0.02599 | 18.25002  |
| 11        | se | 0.06779  | 27.99926  | 5.87745   | 0.05551 | 33.93221  |
| 12        | se | 0.00720  | 27.99925  | 5.93021   | 0.06333 | 33.99280  |
| 13        | ag | 0.75058  | 7.99893   | 10.22454  | 0.02595 | 18.24942  |
| 14        | se | 0.08246  | 27.99926  | 5.86766   | 0.05062 | 33.91754  |
| 15        | o  | -0.89768 | 1.99985   | 6.86082   | 0.03701 | 8.89768   |
| 16        | o  | -0.87255 | 1.99985   | 6.83454   | 0.03816 | 8.87255   |
| 17        | s  | 1.69537  | 9.99909   | 4.10198   | 0.20356 | 14.30463  |
| 18        | s  | 1.69246  | 9.99912   | 4.10222   | 0.20620 | 14.30754  |
| 19        | o  | -0.74569 | 1.99986   | 6.70367   | 0.04216 | 8.74569   |
| 20        | o  | -0.77946 | 1.99985   | 6.73857   | 0.04104 | 8.77946   |
| -----     |    |          |           |           |         |           |
| * Total * |    | 2.00000  | 239.98864 | 126.48410 | 1.52725 | 368.00000 |

For all atoms:

|                       |           |                    |
|-----------------------|-----------|--------------------|
| Core                  | 239.98864 | ( 99.9953% of 240) |
| Valence               | 126.48410 | ( 98.8157% of 128) |
| Natural Minimal Basis | 366.47275 | ( 99.5850% of 368) |
| Natural Rydberg Basis | 1.52725   | ( 0.4150% of 368)  |

\*\*\*\*\*  
 \*  
 \* atomic charges with multicenter corrections \*  
 \*  
 \*\*\*\*\*

| atom  | charge  |
|-------|---------|
| 1 s   | 1.1779  |
| 2 s   | 1.1824  |
| 3 o   | -0.6120 |
| 4 o   | -0.4676 |
| 5 o   | -0.5912 |
| 6 o   | -0.5122 |
| 7 se  | 0.1963  |
| 8 se  | 0.1144  |
| 9 se  | 0.0894  |
| 10 ag | 0.4226  |
| 11 se | 0.1134  |
| 12 se | 0.1975  |
| 13 ag | 0.4229  |
| 14 se | 0.0890  |
| 15 o  | -0.6127 |
| 16 o  | -0.5916 |
| 17 s  | 1.1782  |
| 18 s  | 1.1825  |
| 19 o  | -0.4672 |
| 20 o  | -0.5120 |

### Ag<sub>2</sub>Se<sub>6</sub><sup>2+</sup> (A)

Second Order Perturbation Theory Analysis of Fock Matrix in NBO Basis

Threshold for printing: 1.00 kcal/mol  
 (Intermolecular threshold: 0.05 kcal/mol)

| Donor NBO (i)        | Acceptor NBO (j)        | E(2)<br>kcal/mol | E(j)-E(i)<br>a.u. | F(i,j)<br>a.u. |
|----------------------|-------------------------|------------------|-------------------|----------------|
| 1. BD ( 1)Se 1 -Se 4 | / 3. BD*( 2)Se 1 -Se 4  | 1.28             | 0.26              | 0.045          |
| 1. BD ( 1)Se 1 -Se 4 | /115. LP*( 6)Ag 7       | 1.72             | 0.64              | 0.030          |
| 1. BD ( 1)Se 1 -Se 4 | /116. LP*( 7)Ag 7       | 1.26             | 0.74              | 0.027          |
| 1. BD ( 1)Se 1 -Se 4 | /122. LP ( 6)Ag 8       | 1.72             | 0.64              | 0.030          |
| 1. BD ( 1)Se 1 -Se 4 | /123. LP*( 7)Ag 8       | 1.26             | 0.74              | 0.027          |
| 2. BD ( 2)Se 1 -Se 4 | /115. LP*( 6)Ag 7       | 2.96             | 0.45              | 0.033          |
| 2. BD ( 2)Se 1 -Se 4 | /122. LP ( 6)Ag 8       | 2.96             | 0.45              | 0.033          |
| 2. BD ( 2)Se 1 -Se 4 | /315. RY*( 11)Ag 7      | 1.03             | 41.22             | 0.187          |
| 2. BD ( 2)Se 1 -Se 4 | /356. RY*( 9)Ag 8       | 1.03             | 41.22             | 0.187          |
| 2. BD ( 2)Se 1 -Se 4 | /394. BD*( 1)Se 2 -Se 5 | 1.34             | 0.29              | 0.018          |

|      |     |        |       |   |       |            |       |   |      |       |       |
|------|-----|--------|-------|---|-------|------------|-------|---|------|-------|-------|
| 2.   | BD  | ( 2)Se | 1 -Se | 4 | /395. | BD*( 1)Se  | 2 -Ag | 7 | 2.18 | 0.44  | 0.028 |
| 2.   | BD  | ( 2)Se | 1 -Se | 4 | /396. | BD*( 1)Se  | 3 -Se | 6 | 1.34 | 0.29  | 0.018 |
| 2.   | BD  | ( 2)Se | 1 -Se | 4 | /397. | BD*( 1)Se  | 3 -Ag | 8 | 2.18 | 0.44  | 0.028 |
| 2.   | BD  | ( 2)Se | 1 -Se | 4 | /399. | BD*( 1)Se  | 5 -Ag | 8 | 1.59 | 0.44  | 0.024 |
| 2.   | BD  | ( 2)Se | 1 -Se | 4 | /400. | BD*( 1)Se  | 6 -Ag | 7 | 1.59 | 0.44  | 0.024 |
| 3.   | BD* | ( 2)Se | 1 -Se | 4 | /115. | LP*( 6)Ag  |       | 7 | 4.70 | 0.39  | 0.040 |
| 3.   | BD* | ( 2)Se | 1 -Se | 4 | /122. | LP ( 6)Ag  |       | 8 | 4.70 | 0.39  | 0.040 |
| 3.   | BD* | ( 2)Se | 1 -Se | 4 | /125. | RY*( 1)Se  |       | 1 | 2.85 | 0.84  | 0.046 |
| 3.   | BD* | ( 2)Se | 1 -Se | 4 | /215. | RY*( 1)Se  |       | 4 | 2.85 | 0.84  | 0.046 |
| 3.   | BD* | ( 2)Se | 1 -Se | 4 | /315. | RY*( 11)Ag |       | 7 | 1.00 | 41.16 | 0.193 |
| 3.   | BD* | ( 2)Se | 1 -Se | 4 | /356. | RY*( 9)Ag  |       | 8 | 1.00 | 41.16 | 0.193 |
| 3.   | BD* | ( 2)Se | 1 -Se | 4 | /392. | BD*( 1)Se  | 1 -Se | 5 | 4.72 | 0.23  | 0.031 |
| 3.   | BD* | ( 2)Se | 1 -Se | 4 | /394. | BD*( 1)Se  | 2 -Se | 5 | 2.51 | 0.23  | 0.022 |
| 3.   | BD* | ( 2)Se | 1 -Se | 4 | /395. | BD*( 1)Se  | 2 -Ag | 7 | 2.95 | 0.38  | 0.031 |
| 3.   | BD* | ( 2)Se | 1 -Se | 4 | /396. | BD*( 1)Se  | 3 -Se | 6 | 2.51 | 0.23  | 0.022 |
| 3.   | BD* | ( 2)Se | 1 -Se | 4 | /397. | BD*( 1)Se  | 3 -Ag | 8 | 2.95 | 0.38  | 0.031 |
| 3.   | BD* | ( 2)Se | 1 -Se | 4 | /398. | BD*( 1)Se  | 4 -Se | 6 | 4.72 | 0.23  | 0.031 |
| 3.   | BD* | ( 2)Se | 1 -Se | 4 | /399. | BD*( 1)Se  | 5 -Ag | 8 | 4.38 | 0.38  | 0.038 |
| 3.   | BD* | ( 2)Se | 1 -Se | 4 | /400. | BD*( 1)Se  | 6 -Ag | 7 | 4.38 | 0.38  | 0.038 |
| 4.   | BD  | ( 1)Se | 1 -Se | 5 | /115. | LP*( 6)Ag  |       | 7 | 2.12 | 0.65  | 0.033 |
| 4.   | BD  | ( 1)Se | 1 -Se | 5 | /116. | LP*( 7)Ag  |       | 7 | 1.30 | 0.74  | 0.028 |
| 4.   | BD  | ( 1)Se | 1 -Se | 5 | /123. | LP*( 7)Ag  |       | 8 | 1.59 | 0.74  | 0.031 |
| 4.   | BD  | ( 1)Se | 1 -Se | 5 | /399. | BD*( 1)Se  | 5 -Ag | 8 | 1.53 | 0.64  | 0.028 |
| 5.   | BD  | ( 1)Se | 2 -Se | 3 | /116. | LP*( 7)Ag  |       | 7 | 1.64 | 0.74  | 0.031 |
| 5.   | BD  | ( 1)Se | 2 -Se | 3 | /123. | LP*( 7)Ag  |       | 8 | 1.64 | 0.74  | 0.031 |
| 5.   | BD  | ( 1)Se | 2 -Se | 3 | /395. | BD*( 1)Se  | 2 -Ag | 7 | 1.14 | 0.63  | 0.024 |
| 5.   | BD  | ( 1)Se | 2 -Se | 3 | /397. | BD*( 1)Se  | 3 -Ag | 8 | 1.14 | 0.63  | 0.024 |
| 6.   | BD  | ( 1)Se | 2 -Se | 5 | /116. | LP*( 7)Ag  |       | 7 | 1.54 | 0.74  | 0.030 |
| 6.   | BD  | ( 1)Se | 2 -Se | 5 | /123. | LP*( 7)Ag  |       | 8 | 1.64 | 0.74  | 0.031 |
| 6.   | BD  | ( 1)Se | 2 -Se | 5 | /395. | BD*( 1)Se  | 2 -Ag | 7 | 1.46 | 0.63  | 0.028 |
| 6.   | BD  | ( 1)Se | 2 -Se | 5 | /399. | BD*( 1)Se  | 5 -Ag | 8 | 1.14 | 0.63  | 0.024 |
| 7.   | BD  | ( 1)Se | 2 -Ag | 7 | /392. | BD*( 1)Se  | 1 -Se | 5 | 2.82 | 0.28  | 0.025 |
| 7.   | BD  | ( 1)Se | 2 -Ag | 7 | /396. | BD*( 1)Se  | 3 -Se | 6 | 2.95 | 0.29  | 0.026 |
| 7.   | BD  | ( 1)Se | 2 -Ag | 7 | /400. | BD*( 1)Se  | 6 -Ag | 7 | 4.29 | 0.43  | 0.039 |
| 8.   | BD  | ( 1)Se | 3 -Se | 6 | /116. | LP*( 7)Ag  |       | 7 | 1.64 | 0.74  | 0.031 |
| 8.   | BD  | ( 1)Se | 3 -Se | 6 | /123. | LP*( 7)Ag  |       | 8 | 1.54 | 0.74  | 0.030 |
| 8.   | BD  | ( 1)Se | 3 -Se | 6 | /397. | BD*( 1)Se  | 3 -Ag | 8 | 1.46 | 0.63  | 0.028 |
| 8.   | BD  | ( 1)Se | 3 -Se | 6 | /400. | BD*( 1)Se  | 6 -Ag | 7 | 1.14 | 0.63  | 0.024 |
| 9.   | BD  | ( 1)Se | 3 -Ag | 8 | /394. | BD*( 1)Se  | 2 -Se | 5 | 2.95 | 0.29  | 0.026 |
| 9.   | BD  | ( 1)Se | 3 -Ag | 8 | /398. | BD*( 1)Se  | 4 -Se | 6 | 2.82 | 0.28  | 0.025 |
| 9.   | BD  | ( 1)Se | 3 -Ag | 8 | /399. | BD*( 1)Se  | 5 -Ag | 8 | 4.29 | 0.43  | 0.039 |
| 10.  | BD  | ( 1)Se | 4 -Se | 6 | /116. | LP*( 7)Ag  |       | 7 | 1.59 | 0.74  | 0.031 |
| 10.  | BD  | ( 1)Se | 4 -Se | 6 | /122. | LP ( 6)Ag  |       | 8 | 2.12 | 0.65  | 0.033 |
| 10.  | BD  | ( 1)Se | 4 -Se | 6 | /123. | LP*( 7)Ag  |       | 8 | 1.30 | 0.74  | 0.028 |
| 10.  | BD  | ( 1)Se | 4 -Se | 6 | /400. | BD*( 1)Se  | 6 -Ag | 7 | 1.53 | 0.64  | 0.028 |
| 11.  | BD  | ( 1)Se | 5 -Ag | 8 | /391. | BD*( 1)Se  | 1 -Se | 4 | 3.10 | 0.29  | 0.027 |
| 11.  | BD  | ( 1)Se | 5 -Ag | 8 | /393. | BD*( 1)Se  | 2 -Se | 3 | 2.95 | 0.29  | 0.026 |
| 11.  | BD  | ( 1)Se | 5 -Ag | 8 | /397. | BD*( 1)Se  | 3 -Ag | 8 | 4.29 | 0.43  | 0.039 |
| 12.  | BD  | ( 1)Se | 6 -Ag | 7 | /391. | BD*( 1)Se  | 1 -Se | 4 | 3.10 | 0.29  | 0.027 |
| 12.  | BD  | ( 1)Se | 6 -Ag | 7 | /393. | BD*( 1)Se  | 2 -Se | 3 | 2.95 | 0.29  | 0.026 |
| 12.  | BD  | ( 1)Se | 6 -Ag | 7 | /395. | BD*( 1)Se  | 2 -Ag | 7 | 4.29 | 0.43  | 0.039 |
| 15.  | CR  | ( 3)Se | 1     |   | /115. | LP*( 6)Ag  |       | 7 | 4.63 | 10.79 | 0.201 |
| 15.  | CR  | ( 3)Se | 1     |   | /116. | LP*( 7)Ag  |       | 7 | 1.59 | 10.89 | 0.118 |
| 15.  | CR  | ( 3)Se | 1     |   | /123. | LP*( 7)Ag  |       | 8 | 1.01 | 10.89 | 0.094 |
| 29.  | CR  | ( 3)Se | 2     |   | /116. | LP*( 7)Ag  |       | 7 | 2.29 | 10.89 | 0.141 |
| 29.  | CR  | ( 3)Se | 2     |   | /123. | LP*( 7)Ag  |       | 8 | 1.25 | 10.89 | 0.104 |
| 29.  | CR  | ( 3)Se | 2     |   | /395. | BD*( 1)Se  | 2 -Ag | 7 | 2.97 | 10.78 | 0.163 |
| 43.  | CR  | ( 3)Se | 3     |   | /116. | LP*( 7)Ag  |       | 7 | 1.25 | 10.89 | 0.104 |
| 43.  | CR  | ( 3)Se | 3     |   | /123. | LP*( 7)Ag  |       | 8 | 2.29 | 10.89 | 0.141 |
| 43.  | CR  | ( 3)Se | 3     |   | /397. | BD*( 1)Se  | 3 -Ag | 8 | 2.97 | 10.78 | 0.163 |
| 57.  | CR  | ( 3)Se | 4     |   | /116. | LP*( 7)Ag  |       | 7 | 1.01 | 10.89 | 0.094 |
| 57.  | CR  | ( 3)Se | 4     |   | /122. | LP ( 6)Ag  |       | 8 | 4.63 | 10.79 | 0.201 |
| 57.  | CR  | ( 3)Se | 4     |   | /123. | LP*( 7)Ag  |       | 8 | 1.59 | 10.89 | 0.118 |
| 71.  | CR  | ( 3)Se | 5     |   | /116. | LP*( 7)Ag  |       | 7 | 1.01 | 10.89 | 0.094 |
| 71.  | CR  | ( 3)Se | 5     |   | /123. | LP*( 7)Ag  |       | 8 | 2.29 | 10.89 | 0.141 |
| 71.  | CR  | ( 3)Se | 5     |   | /399. | BD*( 1)Se  | 5 -Ag | 8 | 2.97 | 10.78 | 0.163 |
| 85.  | CR  | ( 3)Se | 6     |   | /116. | LP*( 7)Ag  |       | 7 | 2.29 | 10.89 | 0.141 |
| 85.  | CR  | ( 3)Se | 6     |   | /123. | LP*( 7)Ag  |       | 8 | 1.01 | 10.89 | 0.094 |
| 85.  | CR  | ( 3)Se | 6     |   | /400. | BD*( 1)Se  | 6 -Ag | 7 | 2.97 | 10.78 | 0.163 |
| 105. | LP  | ( 1)Se | 1     |   | / 3.  | BD*( 2)Se  | 1 -Se | 4 | 1.00 | 0.52  | 0.055 |
| 105. | LP  | ( 1)Se | 1     |   | /115. | LP*( 6)Ag  |       | 7 | 8.31 | 0.91  | 0.078 |
| 105. | LP  | ( 1)Se | 1     |   | /116. | LP*( 7)Ag  |       | 7 | 1.94 | 1.01  | 0.040 |
| 105. | LP  | ( 1)Se | 1     |   | /123. | LP*( 7)Ag  |       | 8 | 1.29 | 1.01  | 0.032 |
| 105. | LP  | ( 1)Se | 1     |   | /395. | BD*( 1)Se  | 2 -Ag | 7 | 1.89 | 0.90  | 0.037 |
| 105. | LP  | ( 1)Se | 1     |   | /399. | BD*( 1)Se  | 5 -Ag | 8 | 1.63 | 0.90  | 0.035 |
| 105. | LP  | ( 1)Se | 1     |   | /400. | BD*( 1)Se  | 6 -Ag | 7 | 1.89 | 0.90  | 0.037 |
| 106. | LP  | ( 1)Se | 2     |   | /116. | LP*( 7)Ag  |       | 7 | 2.94 | 1.00  | 0.049 |
| 106. | LP  | ( 1)Se | 2     |   | /123. | LP*( 7)Ag  |       | 8 | 1.60 | 1.00  | 0.036 |
| 106. | LP  | ( 1)Se | 2     |   | /395. | BD*( 1)Se  | 2 -Ag | 7 | 5.51 | 0.90  | 0.064 |
| 107. | LP  | ( 1)Se | 3     |   | /116. | LP*( 7)Ag  |       | 7 | 1.60 | 1.00  | 0.036 |
| 107. | LP  | ( 1)Se | 3     |   | /123. | LP*( 7)Ag  |       | 8 | 2.94 | 1.00  | 0.049 |
| 107. | LP  | ( 1)Se | 3     |   | /397. | BD*( 1)Se  | 3 -Ag | 8 | 5.51 | 0.90  | 0.064 |

|                  |                         |      |      |       |
|------------------|-------------------------|------|------|-------|
| 108. LP ( 1)Se 4 | / 3. BD*( 2)Se 1 -Se 4  | 1.00 | 0.52 | 0.055 |
| 108. LP ( 1)Se 4 | /116. LP*( 7)Ag 7       | 1.29 | 1.01 | 0.032 |
| 108. LP ( 1)Se 4 | /122. LP ( 6)Ag 8       | 8.31 | 0.91 | 0.078 |
| 108. LP ( 1)Se 4 | /123. LP*( 7)Ag 8       | 1.94 | 1.01 | 0.040 |
| 108. LP ( 1)Se 4 | /397. BD*( 1)Se 3 -Ag 8 | 1.89 | 0.90 | 0.037 |
| 108. LP ( 1)Se 4 | /399. BD*( 1)Se 5 -Ag 8 | 1.89 | 0.90 | 0.037 |
| 108. LP ( 1)Se 4 | /400. BD*( 1)Se 6 -Ag 7 | 1.63 | 0.90 | 0.035 |
| 109. LP ( 1)Se 5 | /116. LP*( 7)Ag 7       | 1.29 | 1.00 | 0.032 |
| 109. LP ( 1)Se 5 | /123. LP*( 7)Ag 8       | 2.94 | 1.00 | 0.049 |
| 109. LP ( 1)Se 5 | /395. BD*( 1)Se 2 -Ag 7 | 1.62 | 0.90 | 0.034 |
| 109. LP ( 1)Se 5 | /399. BD*( 1)Se 5 -Ag 8 | 5.51 | 0.90 | 0.064 |
| 110. LP ( 1)Se 6 | /116. LP*( 7)Ag 7       | 2.94 | 1.00 | 0.049 |
| 110. LP ( 1)Se 6 | /123. LP*( 7)Ag 8       | 1.29 | 1.00 | 0.032 |
| 110. LP ( 1)Se 6 | /397. BD*( 1)Se 3 -Ag 8 | 1.62 | 0.90 | 0.034 |
| 110. LP ( 1)Se 6 | /400. BD*( 1)Se 6 -Ag 7 | 5.51 | 0.90 | 0.064 |

Wiberg bond index matrix in the NAO basis:

| Atom  | 1      | 2      | 3      | 4      | 5      | 6      | 7      | 8      |
|-------|--------|--------|--------|--------|--------|--------|--------|--------|
| 1. Se | 0.0000 | 0.0794 | 0.0132 | 1.0037 | 1.0037 | 0.0794 | 0.1661 | 0.0211 |
| 2. Se | 0.0794 | 0.0000 | 1.0037 | 0.0132 | 1.0037 | 0.0794 | 0.1661 | 0.0211 |
| 3. Se | 0.0132 | 1.0037 | 0.0000 | 0.0794 | 0.0794 | 1.0037 | 0.0211 | 0.1661 |
| 4. Se | 1.0037 | 0.0132 | 0.0794 | 0.0000 | 0.0794 | 1.0037 | 0.0211 | 0.1661 |
| 5. Se | 1.0037 | 1.0037 | 0.0794 | 0.0794 | 0.0000 | 0.0132 | 0.0211 | 0.1661 |
| 6. Se | 0.0794 | 0.0794 | 1.0037 | 1.0037 | 0.0132 | 0.0000 | 0.1661 | 0.0211 |
| 7. Ag | 0.1661 | 0.1661 | 0.0211 | 0.0211 | 0.0211 | 0.1661 | 0.0000 | 0.0180 |
| 8. Ag | 0.0211 | 0.0211 | 0.1661 | 0.1661 | 0.1661 | 0.0211 | 0.0180 | 0.0000 |

Summary of Natural Population Analysis:

| Atom No   | Natural Charge | Natural Population |          |         |           | Total |
|-----------|----------------|--------------------|----------|---------|-----------|-------|
|           |                | Core               | Valence  | Rydberg |           |       |
| 1 se      | 0.07063        | 27.99931           | 5.86922  | 0.06084 | 33.92937  |       |
| 2 se      | 0.07063        | 27.99931           | 5.86922  | 0.06084 | 33.92937  |       |
| 3 se      | 0.07063        | 27.99931           | 5.86922  | 0.06084 | 33.92937  |       |
| 4 se      | 0.07063        | 27.99931           | 5.86922  | 0.06084 | 33.92937  |       |
| 5 se      | 0.07063        | 27.99931           | 5.86922  | 0.06084 | 33.92937  |       |
| 6 se      | 0.07063        | 27.99931           | 5.86922  | 0.06084 | 33.92937  |       |
| 7 ag      | 0.78812        | 7.99937            | 10.19313 | 0.01939 | 18.21188  |       |
| 8 ag      | 0.78812        | 7.99937            | 10.19313 | 0.01939 | 18.21188  |       |
| * Total * | 2.00000        | 183.99461          | 55.60158 | 0.40381 | 240.00000 |       |

For all atoms:

Core 183.99461( 99.9971% of 184)  
 Valence 55.60158( 99.2885% of 56)  
 Natural Minimal Basis 239.59619( 99.8317% of 240)  
 Natural Rydberg Basis 0.40381( 0.1683% of 240)

\*\*\*\*\*  
 \*  
 \* atomic charges with multicenter corrections \*  
 \*  
 \*\*\*\*\*

| atom | charge |
|------|--------|
| 1 se | 0.1930 |
| 2 se | 0.1930 |
| 3 se | 0.1930 |
| 4 se | 0.1930 |
| 5 se | 0.1930 |
| 6 se | 0.1930 |
| 7 ag | 0.4209 |
| 8 ag | 0.4209 |

$\text{Ag}_3(\text{Se}_6)_2^{3+}$  (C)

Second Order Perturbation Theory Analysis of Fock Matrix in NBO Basis

Threshold for printing: 1.00 kcal/mol  
 (Intermolecular threshold: 0.05 kcal/mol)

| Donor NBO (i) | Acceptor NBO (j) | E(2)<br>kcal/mol | E(j)-E(i)<br>a.u. | F(i,j)<br>a.u. |
|---------------|------------------|------------------|-------------------|----------------|
| =====         |                  |                  |                   |                |



|      |    |   |      |    |     |    |       |      |       |          |       |       |       |
|------|----|---|------|----|-----|----|-------|------|-------|----------|-------|-------|-------|
| 3.   | BD | ( | 1)Se | 1  | -Ag | 13 | /394. | RY*( | 3)Se  | 6        | 2.05  | 1.28  | 0.047 |
| 3.   | BD | ( | 1)Se | 1  | -Ag | 13 | /397. | RY*( | 6)Se  | 6        | 1.04  | 0.99  | 0.029 |
| 3.   | BD | ( | 1)Se | 1  | -Ag | 13 | /613. | RY*( | 12)Ag | 13       | 1.56  | 4.19  | 0.074 |
| 3.   | BD | ( | 1)Se | 1  | -Ag | 13 | /614. | RY*( | 13)Ag | 13       | 2.07  | 42.37 | 0.271 |
| 3.   | BD | ( | 1)Se | 1  | -Ag | 13 | /737. | BD*( | 1)Se  | 3 -Se 9  | 2.97  | 0.40  | 0.031 |
| 3.   | BD | ( | 1)Se | 1  | -Ag | 13 | /742. | BD*( | 1)Se  | 6 -Ag 13 | 15.14 | 0.51  | 0.079 |
| 3.   | BD | ( | 1)Se | 1  | -Ag | 13 | /743. | BD*( | 1)Se  | 7 -Se 11 | 2.97  | 0.40  | 0.031 |
| 12.  | BD | ( | 1)Se | 6  | -Ag | 13 | /244. | RY*( | 3)Se  | 1        | 2.05  | 1.28  | 0.047 |
| 12.  | BD | ( | 1)Se | 6  | -Ag | 13 | /247. | RY*( | 6)Se  | 1        | 1.04  | 0.99  | 0.029 |
| 12.  | BD | ( | 1)Se | 6  | -Ag | 13 | /613. | RY*( | 12)Ag | 13       | 1.56  | 4.19  | 0.074 |
| 12.  | BD | ( | 1)Se | 6  | -Ag | 13 | /614. | RY*( | 13)Ag | 13       | 2.07  | 42.37 | 0.271 |
| 12.  | BD | ( | 1)Se | 6  | -Ag | 13 | /733. | BD*( | 1)Se  | 1 -Ag 13 | 15.14 | 0.51  | 0.079 |
| 12.  | BD | ( | 1)Se | 6  | -Ag | 13 | /739. | BD*( | 1)Se  | 4 -Se 10 | 2.97  | 0.40  | 0.031 |
| 12.  | BD | ( | 1)Se | 6  | -Ag | 13 | /744. | BD*( | 1)Se  | 8 -Se 12 | 2.97  | 0.40  | 0.031 |
| 17.  | CR | ( | 3)Se | 1  |     |    | /222. | LP*( | 6)Ag  | 13       | 1.19  | 10.88 | 0.102 |
| 17.  | CR | ( | 3)Se | 1  |     |    | /733. | BD*( | 1)Se  | 1 -Ag 13 | 1.81  | 10.80 | 0.127 |
| 87.  | CR | ( | 3)Se | 6  |     |    | /222. | LP*( | 6)Ag  | 13       | 1.19  | 10.88 | 0.102 |
| 87.  | CR | ( | 3)Se | 6  |     |    | /742. | BD*( | 1)Se  | 6 -Ag 13 | 1.81  | 10.80 | 0.127 |
| 195. | LP | ( | 1)Se | 1  |     |    | /222. | LP*( | 6)Ag  | 13       | 2.81  | 0.89  | 0.045 |
| 195. | LP | ( | 1)Se | 1  |     |    | /733. | BD*( | 1)Se  | 1 -Ag 13 | 2.26  | 0.81  | 0.039 |
| 197. | LP | ( | 2)Se | 2  |     |    | /739. | BD*( | 1)Se  | 4 -Se 10 | 2.85  | 0.30  | 0.027 |
| 197. | LP | ( | 2)Se | 2  |     |    | /744. | BD*( | 1)Se  | 8 -Se 12 | 2.85  | 0.30  | 0.027 |
| 199. | LP | ( | 2)Se | 3  |     |    | /362. | RY*( | 1)Se  | 5        | 1.67  | 0.75  | 0.033 |
| 199. | LP | ( | 2)Se | 3  |     |    | /482. | RY*( | 1)Se  | 9        | 2.70  | 0.74  | 0.042 |
| 199. | LP | ( | 2)Se | 3  |     |    | /732. | BD*( | 1)Se  | 1 -Se 9  | 10.31 | 0.20  | 0.041 |
| 199. | LP | ( | 2)Se | 3  |     |    | /740. | BD*( | 1)Se  | 5 -Se 11 | 6.60  | 0.24  | 0.036 |
| 201. | LP | ( | 2)Se | 4  |     |    | /735. | BD*( | 1)Se  | 2 -Se 10 | 3.59  | 0.29  | 0.029 |
| 201. | LP | ( | 2)Se | 4  |     |    | /741. | BD*( | 1)Se  | 6 -Se 12 | 3.49  | 0.25  | 0.027 |
| 203. | LP | ( | 2)Se | 5  |     |    | /737. | BD*( | 1)Se  | 3 -Se 9  | 2.85  | 0.30  | 0.027 |
| 203. | LP | ( | 2)Se | 5  |     |    | /743. | BD*( | 1)Se  | 7 -Se 11 | 2.85  | 0.30  | 0.027 |
| 204. | LP | ( | 1)Se | 6  |     |    | /222. | LP*( | 6)Ag  | 13       | 2.81  | 0.89  | 0.045 |
| 204. | LP | ( | 1)Se | 6  |     |    | /742. | BD*( | 1)Se  | 6 -Ag 13 | 2.26  | 0.81  | 0.039 |
| 206. | LP | ( | 2)Se | 7  |     |    | /732. | BD*( | 1)Se  | 1 -Se 9  | 3.49  | 0.25  | 0.027 |
| 206. | LP | ( | 2)Se | 7  |     |    | /740. | BD*( | 1)Se  | 5 -Se 11 | 3.59  | 0.29  | 0.029 |
| 208. | LP | ( | 2)Se | 8  |     |    | /272. | RY*( | 1)Se  | 2        | 1.67  | 0.75  | 0.033 |
| 208. | LP | ( | 2)Se | 8  |     |    | /572. | RY*( | 1)Se  | 12       | 2.70  | 0.74  | 0.042 |
| 208. | LP | ( | 2)Se | 8  |     |    | /735. | BD*( | 1)Se  | 2 -Se 10 | 6.60  | 0.24  | 0.036 |
| 208. | LP | ( | 2)Se | 8  |     |    | /741. | BD*( | 1)Se  | 6 -Se 12 | 10.31 | 0.20  | 0.041 |
| 210. | LP | ( | 2)Se | 9  |     |    | /731. | BD*( | 1)Se  | 1 -Se 7  | 3.49  | 0.25  | 0.027 |
| 210. | LP | ( | 2)Se | 9  |     |    | /736. | BD*( | 1)Se  | 3 -Se 5  | 3.59  | 0.29  | 0.029 |
| 212. | LP | ( | 2)Se | 10 |     |    | /272. | RY*( | 1)Se  | 2        | 1.67  | 0.75  | 0.033 |
| 212. | LP | ( | 2)Se | 10 |     |    | /332. | RY*( | 1)Se  | 4        | 2.70  | 0.74  | 0.042 |
| 212. | LP | ( | 2)Se | 10 |     |    | /734. | BD*( | 1)Se  | 2 -Se 8  | 6.60  | 0.24  | 0.036 |
| 212. | LP | ( | 2)Se | 10 |     |    | /738. | BD*( | 1)Se  | 4 -Se 6  | 10.31 | 0.20  | 0.041 |
| 214. | LP | ( | 2)Se | 11 |     |    | /362. | RY*( | 1)Se  | 5        | 1.67  | 0.75  | 0.033 |
| 214. | LP | ( | 2)Se | 11 |     |    | /422. | RY*( | 1)Se  | 7        | 2.70  | 0.74  | 0.042 |
| 214. | LP | ( | 2)Se | 11 |     |    | /731. | BD*( | 1)Se  | 1 -Se 7  | 10.31 | 0.20  | 0.041 |
| 214. | LP | ( | 2)Se | 11 |     |    | /736. | BD*( | 1)Se  | 3 -Se 5  | 6.60  | 0.24  | 0.036 |
| 216. | LP | ( | 2)Se | 12 |     |    | /734. | BD*( | 1)Se  | 2 -Se 8  | 3.59  | 0.29  | 0.029 |
| 216. | LP | ( | 2)Se | 12 |     |    | /738. | BD*( | 1)Se  | 4 -Se 6  | 3.49  | 0.25  | 0.027 |
| 1.   | BD | ( | 1)Se | 1  | -Se | 7  | /232. | LP*( | 9)Ag  | 14       | 1.24  | 0.68  | 0.026 |
| 2.   | BD | ( | 1)Se | 1  | -Se | 9  | /232. | LP*( | 9)Ag  | 14       | 1.24  | 0.68  | 0.026 |
| 6.   | BD | ( | 1)Se | 3  | -Se | 5  | /229. | LP*( | 6)Ag  | 14       | 1.44  | 0.49  | 0.025 |
| 6.   | BD | ( | 1)Se | 3  | -Se | 5  | /230. | LP*( | 7)Ag  | 14       | 1.04  | 0.61  | 0.023 |
| 6.   | BD | ( | 1)Se | 3  | -Se | 5  | /232. | LP*( | 9)Ag  | 14       | 1.78  | 0.66  | 0.031 |
| 7.   | BD | ( | 1)Se | 3  | -Se | 9  | /229. | LP*( | 6)Ag  | 14       | 1.19  | 0.51  | 0.024 |
| 7.   | BD | ( | 1)Se | 3  | -Se | 9  | /231. | LP*( | 8)Ag  | 14       | 1.11  | 0.62  | 0.024 |
| 7.   | BD | ( | 1)Se | 3  | -Se | 9  | /232. | LP*( | 9)Ag  | 14       | 1.37  | 0.68  | 0.027 |
| 10.  | BD | ( | 1)Se | 5  | -Se | 11 | /229. | LP*( | 6)Ag  | 14       | 1.44  | 0.49  | 0.025 |
| 10.  | BD | ( | 1)Se | 5  | -Se | 11 | /230. | LP*( | 7)Ag  | 14       | 1.04  | 0.61  | 0.023 |
| 10.  | BD | ( | 1)Se | 5  | -Se | 11 | /232. | LP*( | 9)Ag  | 14       | 1.78  | 0.66  | 0.031 |
| 13.  | BD | ( | 1)Se | 7  | -Se | 11 | /229. | LP*( | 6)Ag  | 14       | 1.19  | 0.51  | 0.024 |
| 13.  | BD | ( | 1)Se | 7  | -Se | 11 | /231. | LP*( | 8)Ag  | 14       | 1.11  | 0.62  | 0.024 |
| 13.  | BD | ( | 1)Se | 7  | -Se | 11 | /232. | LP*( | 9)Ag  | 14       | 1.37  | 0.68  | 0.027 |
| 45.  | CR | ( | 3)Se | 3  |     |    | /232. | LP*( | 9)Ag  | 14       | 1.33  | 10.60 | 0.106 |
| 73.  | CR | ( | 3)Se | 5  |     |    | /229. | LP*( | 6)Ag  | 14       | 3.46  | 10.69 | 0.185 |
| 73.  | CR | ( | 3)Se | 5  |     |    | /230. | LP*( | 7)Ag  | 14       | 3.73  | 10.82 | 0.181 |
| 73.  | CR | ( | 3)Se | 5  |     |    | /232. | LP*( | 9)Ag  | 14       | 2.51  | 10.86 | 0.148 |
| 101. | CR | ( | 3)Se | 7  |     |    | /229. | LP*( | 6)Ag  | 14       | 2.44  | 10.64 | 0.155 |
| 101. | CR | ( | 3)Se | 7  |     |    | /231. | LP*( | 8)Ag  | 14       | 2.33  | 10.75 | 0.142 |
| 101. | CR | ( | 3)Se | 7  |     |    | /232. | LP*( | 9)Ag  | 14       | 1.85  | 10.81 | 0.127 |
| 129. | CR | ( | 3)Se | 9  |     |    | /229. | LP*( | 6)Ag  | 14       | 2.44  | 10.64 | 0.155 |
| 129. | CR | ( | 3)Se | 9  |     |    | /231. | LP*( | 8)Ag  | 14       | 2.33  | 10.75 | 0.142 |
| 129. | CR | ( | 3)Se | 9  |     |    | /232. | LP*( | 9)Ag  | 14       | 1.85  | 10.81 | 0.127 |
| 157. | CR | ( | 3)Se | 11 |     |    | /232. | LP*( | 9)Ag  | 14       | 1.33  | 10.60 | 0.106 |
| 195. | LP | ( | 1)Se | 1  |     |    | /232. | LP*( | 9)Ag  | 14       | 1.22  | 0.87  | 0.029 |
| 198. | LP | ( | 1)Se | 3  |     |    | /229. | LP*( | 6)Ag  | 14       | 1.67  | 0.75  | 0.034 |
| 198. | LP | ( | 1)Se | 3  |     |    | /232. | LP*( | 9)Ag  | 14       | 2.11  | 0.92  | 0.039 |
| 202. | LP | ( | 1)Se | 5  |     |    | /229. | LP*( | 6)Ag  | 14       | 7.01  | 0.74  | 0.069 |
| 202. | LP | ( | 1)Se | 5  |     |    | /230. | LP*( | 7)Ag  | 14       | 6.54  | 0.86  | 0.067 |
| 202. | LP | ( | 1)Se | 5  |     |    | /232. | LP*( | 9)Ag  | 14       | 3.26  | 0.91  | 0.049 |
| 203. | LP | ( | 2)Se | 5  |     |    | /229. | LP*( | 6)Ag  | 14       | 38.23 | 0.30  | 0.098 |

|                        |                    |       |       |       |
|------------------------|--------------------|-------|-------|-------|
| 203. LP ( 2)Se 5       | /230. LP*( 7)Ag 14 | 7.26  | 0.42  | 0.051 |
| 203. LP ( 2)Se 5       | /232. LP*( 9)Ag 14 | 1.52  | 0.47  | 0.025 |
| 203. LP ( 2)Se 5       | /647. RY*( 3)Ag 14 | 3.16  | 2.30  | 0.080 |
| 203. LP ( 2)Se 5       | /651. RY*( 7)Ag 14 | 1.30  | 3.33  | 0.061 |
| 203. LP ( 2)Se 5       | /653. RY*( 9)Ag 14 | 3.90  | 41.13 | 0.374 |
| 205. LP ( 1)Se 7       | /229. LP*( 6)Ag 14 | 5.22  | 0.76  | 0.060 |
| 205. LP ( 1)Se 7       | /230. LP*( 7)Ag 14 | 1.62  | 0.88  | 0.034 |
| 205. LP ( 1)Se 7       | /231. LP*( 8)Ag 14 | 4.21  | 0.87  | 0.054 |
| 205. LP ( 1)Se 7       | /232. LP*( 9)Ag 14 | 2.57  | 0.93  | 0.044 |
| 206. LP ( 2)Se 7       | /229. LP*( 6)Ag 14 | 22.14 | 0.29  | 0.075 |
| 206. LP ( 2)Se 7       | /230. LP*( 7)Ag 14 | 1.40  | 0.42  | 0.022 |
| 206. LP ( 2)Se 7       | /231. LP*( 8)Ag 14 | 3.64  | 0.41  | 0.035 |
| 206. LP ( 2)Se 7       | /232. LP*( 9)Ag 14 | 1.12  | 0.47  | 0.021 |
| 206. LP ( 2)Se 7       | /647. RY*( 3)Ag 14 | 1.33  | 2.30  | 0.051 |
| 206. LP ( 2)Se 7       | /653. RY*( 9)Ag 14 | 1.76  | 41.13 | 0.249 |
| 209. LP ( 1)Se 9       | /229. LP*( 6)Ag 14 | 5.22  | 0.76  | 0.060 |
| 209. LP ( 1)Se 9       | /230. LP*( 7)Ag 14 | 1.62  | 0.88  | 0.034 |
| 209. LP ( 1)Se 9       | /231. LP*( 8)Ag 14 | 4.21  | 0.87  | 0.054 |
| 209. LP ( 1)Se 9       | /232. LP*( 9)Ag 14 | 2.57  | 0.93  | 0.044 |
| 210. LP ( 2)Se 9       | /229. LP*( 6)Ag 14 | 22.14 | 0.29  | 0.075 |
| 210. LP ( 2)Se 9       | /230. LP*( 7)Ag 14 | 1.40  | 0.42  | 0.022 |
| 210. LP ( 2)Se 9       | /231. LP*( 8)Ag 14 | 3.64  | 0.41  | 0.035 |
| 210. LP ( 2)Se 9       | /232. LP*( 9)Ag 14 | 1.12  | 0.47  | 0.021 |
| 210. LP ( 2)Se 9       | /647. RY*( 3)Ag 14 | 1.33  | 2.30  | 0.051 |
| 210. LP ( 2)Se 9       | /653. RY*( 9)Ag 14 | 1.76  | 41.13 | 0.249 |
| 213. LP ( 1)Se 11      | /229. LP*( 6)Ag 14 | 1.67  | 0.75  | 0.034 |
| 213. LP ( 1)Se 11      | /232. LP*( 9)Ag 14 | 2.11  | 0.92  | 0.039 |
| 4. BD ( 1)Se 2 -Se 8   | /238. LP*( 6)Ag 15 | 1.44  | 0.49  | 0.025 |
| 4. BD ( 1)Se 2 -Se 8   | /239. LP*( 7)Ag 15 | 1.04  | 0.61  | 0.023 |
| 4. BD ( 1)Se 2 -Se 8   | /241. LP*( 9)Ag 15 | 1.78  | 0.66  | 0.031 |
| 5. BD ( 1)Se 2 -Se 10  | /238. LP*( 6)Ag 15 | 1.44  | 0.49  | 0.025 |
| 5. BD ( 1)Se 2 -Se 10  | /239. LP*( 7)Ag 15 | 1.04  | 0.61  | 0.023 |
| 5. BD ( 1)Se 2 -Se 10  | /241. LP*( 9)Ag 15 | 1.78  | 0.66  | 0.031 |
| 8. BD ( 1)Se 4 -Se 6   | /241. LP*( 9)Ag 15 | 1.24  | 0.68  | 0.026 |
| 9. BD ( 1)Se 4 -Se 10  | /238. LP*( 6)Ag 15 | 1.19  | 0.51  | 0.024 |
| 9. BD ( 1)Se 4 -Se 10  | /240. LP*( 8)Ag 15 | 1.11  | 0.62  | 0.024 |
| 9. BD ( 1)Se 4 -Se 10  | /241. LP*( 9)Ag 15 | 1.37  | 0.68  | 0.027 |
| 11. BD ( 1)Se 6 -Se 12 | /241. LP*( 9)Ag 15 | 1.24  | 0.68  | 0.026 |
| 14. BD ( 1)Se 8 -Se 12 | /238. LP*( 6)Ag 15 | 1.19  | 0.51  | 0.024 |
| 14. BD ( 1)Se 8 -Se 12 | /240. LP*( 8)Ag 15 | 1.11  | 0.62  | 0.024 |
| 14. BD ( 1)Se 8 -Se 12 | /241. LP*( 9)Ag 15 | 1.37  | 0.68  | 0.027 |
| 31. CR ( 3)Se 2        | /238. LP*( 6)Ag 15 | 3.46  | 10.69 | 0.185 |
| 31. CR ( 3)Se 2        | /239. LP*( 7)Ag 15 | 3.73  | 10.82 | 0.181 |
| 31. CR ( 3)Se 2        | /241. LP*( 9)Ag 15 | 2.51  | 10.86 | 0.148 |
| 59. CR ( 3)Se 4        | /238. LP*( 6)Ag 15 | 2.44  | 10.64 | 0.155 |
| 59. CR ( 3)Se 4        | /240. LP*( 8)Ag 15 | 2.33  | 10.75 | 0.142 |
| 59. CR ( 3)Se 4        | /241. LP*( 9)Ag 15 | 1.85  | 10.81 | 0.127 |
| 115. CR ( 3)Se 8       | /241. LP*( 9)Ag 15 | 1.33  | 10.60 | 0.106 |
| 143. CR ( 3)Se 10      | /241. LP*( 9)Ag 15 | 1.33  | 10.60 | 0.106 |
| 171. CR ( 3)Se 12      | /238. LP*( 6)Ag 15 | 2.44  | 10.64 | 0.155 |
| 171. CR ( 3)Se 12      | /240. LP*( 8)Ag 15 | 2.33  | 10.75 | 0.142 |
| 171. CR ( 3)Se 12      | /241. LP*( 9)Ag 15 | 1.85  | 10.81 | 0.127 |
| 196. LP ( 1)Se 2       | /238. LP*( 6)Ag 15 | 7.01  | 0.74  | 0.069 |
| 196. LP ( 1)Se 2       | /239. LP*( 7)Ag 15 | 6.54  | 0.86  | 0.067 |
| 196. LP ( 1)Se 2       | /241. LP*( 9)Ag 15 | 3.26  | 0.91  | 0.049 |
| 197. LP ( 2)Se 2       | /238. LP*( 6)Ag 15 | 38.23 | 0.30  | 0.098 |
| 197. LP ( 2)Se 2       | /239. LP*( 7)Ag 15 | 7.26  | 0.42  | 0.051 |
| 197. LP ( 2)Se 2       | /241. LP*( 9)Ag 15 | 1.52  | 0.47  | 0.025 |
| 197. LP ( 2)Se 2       | /690. RY*( 3)Ag 15 | 3.16  | 2.30  | 0.080 |
| 197. LP ( 2)Se 2       | /694. RY*( 7)Ag 15 | 1.30  | 3.33  | 0.061 |
| 197. LP ( 2)Se 2       | /696. RY*( 9)Ag 15 | 3.90  | 41.13 | 0.374 |
| 200. LP ( 1)Se 4       | /238. LP*( 6)Ag 15 | 5.22  | 0.76  | 0.060 |
| 200. LP ( 1)Se 4       | /239. LP*( 7)Ag 15 | 1.62  | 0.88  | 0.034 |
| 200. LP ( 1)Se 4       | /240. LP*( 8)Ag 15 | 4.21  | 0.87  | 0.054 |
| 200. LP ( 1)Se 4       | /241. LP*( 9)Ag 15 | 2.57  | 0.93  | 0.044 |
| 201. LP ( 2)Se 4       | /238. LP*( 6)Ag 15 | 22.14 | 0.29  | 0.075 |
| 201. LP ( 2)Se 4       | /239. LP*( 7)Ag 15 | 1.40  | 0.42  | 0.022 |
| 201. LP ( 2)Se 4       | /240. LP*( 8)Ag 15 | 3.64  | 0.41  | 0.035 |
| 201. LP ( 2)Se 4       | /241. LP*( 9)Ag 15 | 1.12  | 0.47  | 0.021 |
| 201. LP ( 2)Se 4       | /690. RY*( 3)Ag 15 | 1.33  | 2.30  | 0.051 |
| 201. LP ( 2)Se 4       | /696. RY*( 9)Ag 15 | 1.76  | 41.13 | 0.249 |
| 204. LP ( 1)Se 6       | /241. LP*( 9)Ag 15 | 1.22  | 0.87  | 0.029 |
| 207. LP ( 1)Se 8       | /238. LP*( 6)Ag 15 | 1.67  | 0.75  | 0.034 |
| 207. LP ( 1)Se 8       | /241. LP*( 9)Ag 15 | 2.11  | 0.92  | 0.039 |
| 211. LP ( 1)Se 10      | /238. LP*( 6)Ag 15 | 1.67  | 0.75  | 0.034 |
| 211. LP ( 1)Se 10      | /241. LP*( 9)Ag 15 | 2.11  | 0.92  | 0.039 |
| 215. LP ( 1)Se 12      | /238. LP*( 6)Ag 15 | 5.22  | 0.76  | 0.060 |
| 215. LP ( 1)Se 12      | /239. LP*( 7)Ag 15 | 1.62  | 0.88  | 0.034 |
| 215. LP ( 1)Se 12      | /240. LP*( 8)Ag 15 | 4.21  | 0.87  | 0.054 |
| 215. LP ( 1)Se 12      | /241. LP*( 9)Ag 15 | 2.57  | 0.93  | 0.044 |
| 216. LP ( 2)Se 12      | /238. LP*( 6)Ag 15 | 22.14 | 0.29  | 0.075 |
| 216. LP ( 2)Se 12      | /239. LP*( 7)Ag 15 | 1.40  | 0.42  | 0.022 |

|                   |                          |      |       |       |
|-------------------|--------------------------|------|-------|-------|
| 216. LP ( 2)Se 12 | /240. LP*( 8)Ag 15       | 3.64 | 0.41  | 0.035 |
| 216. LP ( 2)Se 12 | /241. LP*( 9)Ag 15       | 1.12 | 0.47  | 0.021 |
| 216. LP ( 2)Se 12 | /690. RY*( 3)Ag 15       | 1.33 | 2.30  | 0.051 |
| 216. LP ( 2)Se 12 | /696. RY*( 9)Ag 15       | 1.76 | 41.13 | 0.249 |
| 229. LP*( 6)Ag 14 | /370. RY*( 9)Se 5        | 1.52 | 0.63  | 0.073 |
| 229. LP*( 6)Ag 14 | /733. BD*( 1)Se 1 -Ag 13 | 1.92 | 0.11  | 0.031 |
| 229. LP*( 6)Ag 14 | /232. LP*( 9)Ag 14       | 5.62 | 0.17  | 0.073 |
| 229. LP*( 6)Ag 14 | /647. RY*( 3)Ag 14       | 4.87 | 2.01  | 0.235 |
| 229. LP*( 6)Ag 14 | /651. RY*( 7)Ag 14       | 3.52 | 3.03  | 0.246 |
| 229. LP*( 6)Ag 14 | /652. RY*( 8)Ag 14       | 2.74 | 2.60  | 0.201 |
| 229. LP*( 6)Ag 14 | /653. RY*( 9)Ag 14       | 6.60 | 40.84 | 1.234 |
| 229. LP*( 6)Ag 14 | /661. RY*( 17)Ag 14      | 1.11 | 1.09  | 0.083 |
| 229. LP*( 6)Ag 14 | /677. RY*( 33)Ag 14      | 1.26 | 1.93  | 0.118 |
| 238. LP*( 6)Ag 15 | /280. RY*( 9)Se 2        | 1.52 | 0.63  | 0.073 |
| 238. LP*( 6)Ag 15 | /742. BD*( 1)Se 6 -Ag 13 | 1.92 | 0.11  | 0.031 |
| 238. LP*( 6)Ag 15 | /241. LP*( 9)Ag 15       | 5.62 | 0.17  | 0.073 |
| 238. LP*( 6)Ag 15 | /690. RY*( 3)Ag 15       | 4.87 | 2.01  | 0.235 |
| 238. LP*( 6)Ag 15 | /694. RY*( 7)Ag 15       | 3.52 | 3.03  | 0.246 |
| 238. LP*( 6)Ag 15 | /695. RY*( 8)Ag 15       | 2.74 | 2.60  | 0.201 |
| 238. LP*( 6)Ag 15 | /696. RY*( 9)Ag 15       | 6.60 | 40.84 | 1.234 |
| 238. LP*( 6)Ag 15 | /704. RY*( 17)Ag 15      | 1.11 | 1.09  | 0.083 |
| 238. LP*( 6)Ag 15 | /720. RY*( 33)Ag 15      | 1.26 | 1.93  | 0.118 |

Wiberg bond index matrix in the NAO basis:

| Atom   | 1      | 2      | 3      | 4      | 5      | 6      | 7      | 8      | 9      |
|--------|--------|--------|--------|--------|--------|--------|--------|--------|--------|
| 1. Se  | 0.0000 | 0.0001 | 0.0953 | 0.0017 | 0.0100 | 0.0317 | 0.9302 | 0.0019 | 0.9302 |
| 2. Se  | 0.0001 | 0.0000 | 0.0000 | 0.0699 | 0.0000 | 0.0100 | 0.0000 | 1.0102 | 0.0000 |
| 3. Se  | 0.0953 | 0.0000 | 0.0000 | 0.0001 | 1.0102 | 0.0019 | 0.0140 | 0.0001 | 1.0695 |
| 4. Se  | 0.0017 | 0.0699 | 0.0001 | 0.0000 | 0.0000 | 0.9302 | 0.0005 | 0.0140 | 0.0001 |
| 5. Se  | 0.0100 | 0.0000 | 1.0102 | 0.0000 | 0.0000 | 0.0001 | 0.0699 | 0.0000 | 0.0699 |
| 6. Se  | 0.0317 | 0.0100 | 0.0019 | 0.9302 | 0.0001 | 0.0000 | 0.0017 | 0.0953 | 0.0017 |
| 7. Se  | 0.9302 | 0.0000 | 0.0140 | 0.0005 | 0.0699 | 0.0017 | 0.0000 | 0.0001 | 0.0745 |
| 8. Se  | 0.0019 | 1.0102 | 0.0001 | 0.0140 | 0.0000 | 0.0953 | 0.0001 | 0.0000 | 0.0001 |
| 9. Se  | 0.9302 | 0.0000 | 1.0695 | 0.0001 | 0.0699 | 0.0017 | 0.0745 | 0.0001 | 0.0000 |
| 10. Se | 0.0019 | 1.0102 | 0.0002 | 1.0695 | 0.0000 | 0.0953 | 0.0001 | 0.0884 | 0.0001 |
| 11. Se | 0.0953 | 0.0000 | 0.0000 | 0.0884 | 0.0001 | 1.0102 | 0.0019 | 1.0695 | 0.0002 |
| 12. Se | 0.0017 | 0.0699 | 0.0001 | 0.0745 | 0.0000 | 0.9302 | 0.0001 | 1.0695 | 0.0005 |
| 13. Ag | 0.3562 | 0.0012 | 0.0170 | 0.0148 | 0.0012 | 0.3562 | 0.0148 | 0.0170 | 0.0148 |
| 14. Ag | 0.0229 | 0.0001 | 0.0346 | 0.0001 | 0.2387 | 0.0002 | 0.1653 | 0.0000 | 0.1653 |
| 15. Ag | 0.0002 | 0.2387 | 0.0000 | 0.1653 | 0.0001 | 0.0229 | 0.0001 | 0.0346 | 0.0001 |

  

| Atom   | 10     | 11     | 12     | 13     | 14     | 15     |
|--------|--------|--------|--------|--------|--------|--------|
| 1. Se  | 0.0019 | 0.0953 | 0.0017 | 0.3562 | 0.0229 | 0.0002 |
| 2. Se  | 1.0102 | 0.0000 | 0.0699 | 0.0012 | 0.0001 | 0.2387 |
| 3. Se  | 0.0002 | 0.0884 | 0.0001 | 0.0170 | 0.0346 | 0.0000 |
| 4. Se  | 1.0695 | 0.0001 | 0.0745 | 0.0148 | 0.0001 | 0.1653 |
| 5. Se  | 0.0000 | 1.0102 | 0.0000 | 0.0012 | 0.2387 | 0.0001 |
| 6. Se  | 0.0953 | 0.0019 | 0.9302 | 0.3562 | 0.0002 | 0.0229 |
| 7. Se  | 0.0001 | 1.0695 | 0.0001 | 0.0148 | 0.1653 | 0.0001 |
| 8. Se  | 0.0884 | 0.0002 | 1.0695 | 0.0170 | 0.0000 | 0.0346 |
| 9. Se  | 0.0001 | 0.0140 | 0.0005 | 0.0148 | 0.1653 | 0.0001 |
| 10. Se | 0.0000 | 0.0001 | 0.0140 | 0.0170 | 0.0000 | 0.0346 |
| 11. Se | 0.0001 | 0.0000 | 0.0001 | 0.0170 | 0.0346 | 0.0000 |
| 12. Se | 0.0140 | 0.0001 | 0.0000 | 0.0148 | 0.0001 | 0.1653 |
| 13. Ag | 0.0170 | 0.0170 | 0.0148 | 0.0000 | 0.0031 | 0.0031 |
| 14. Ag | 0.0000 | 0.0346 | 0.0001 | 0.0031 | 0.0000 | 0.0000 |
| 15. Ag | 0.0346 | 0.0000 | 0.1653 | 0.0031 | 0.0000 | 0.0000 |

Summary of Natural Population Analysis:

| Atom No | Natural Charge | Natural Population |          |         |          | Total |
|---------|----------------|--------------------|----------|---------|----------|-------|
|         |                | Core               | Valence  | Rydberg |          |       |
| 1 se    | -0.04368       | 27.99931           | 5.98525  | 0.05911 | 34.04368 |       |
| 2 se    | 0.02905        | 27.99931           | 5.90451  | 0.06713 | 33.97095 |       |
| 3 se    | 0.18591        | 27.99931           | 5.76648  | 0.04831 | 33.81409 |       |
| 4 se    | 0.03567        | 27.99932           | 5.90741  | 0.05760 | 33.96433 |       |
| 5 se    | 0.02905        | 27.99931           | 5.90451  | 0.06713 | 33.97095 |       |
| 6 se    | -0.04368       | 27.99931           | 5.98525  | 0.05911 | 34.04368 |       |
| 7 se    | 0.03567        | 27.99932           | 5.90741  | 0.05760 | 33.96433 |       |
| 8 se    | 0.18591        | 27.99931           | 5.76648  | 0.04831 | 33.81409 |       |
| 9 se    | 0.03567        | 27.99932           | 5.90741  | 0.05760 | 33.96433 |       |
| 10 se   | 0.18591        | 27.99931           | 5.76648  | 0.04831 | 33.81409 |       |
| 11 se   | 0.18591        | 27.99931           | 5.76648  | 0.04831 | 33.81409 |       |
| 12 se   | 0.03567        | 27.99932           | 5.90741  | 0.05760 | 33.96433 |       |
| 13 ag   | 0.62977        | 7.99858            | 10.36047 | 0.01118 | 18.37023 |       |
| 14 ag   | 0.75659        | 7.99923            | 10.22338 | 0.02080 | 18.24341 |       |
| 15 ag   | 0.75659        | 7.99923            | 10.22338 | 0.02080 | 18.24341 |       |

\* Total \* 3.00000 359.98879 101.28233 0.72888 462.00000

For all atoms:  
 Core 359.98879( 99.9969% of 360)  
 Valence 101.28233( 99.2964% of 102)  
 Natural Minimal Basis 461.27112( 99.8422% of 462)  
 Natural Rydberg Basis 0.72888( 0.1578% of 462)

\*\*\*\*\*  
 \*  
 \* atomic charges with multicenter corrections \*  
 \*  
 \*\*\*\*\*

| atom  | charge |
|-------|--------|
| 1 se  | 0.1797 |
| 2 se  | 0.2410 |
| 3 se  | 0.1597 |
| 4 se  | 0.1293 |
| 5 se  | 0.2410 |
| 6 se  | 0.1797 |
| 7 se  | 0.1293 |
| 8 se  | 0.1597 |
| 9 se  | 0.1293 |
| 10 se | 0.1597 |
| 11 se | 0.1597 |
| 12 se | 0.1293 |
| 13 ag | 0.2806 |
| 14 ag | 0.3609 |
| 15 ag | 0.3609 |

Ag<sub>2</sub>Se<sub>6</sub><sup>2+</sup> (B)

Second Order Perturbation Theory Analysis of Fock Matrix in NBO Basis

Threshold for printing: 1.00 kcal/mol  
 (Intermolecular threshold: 0.05 kcal/mol)

| Donor NBO (i)        | Acceptor NBO (j)        | E(2)<br>kcal/mol | E(j)-E(i)<br>a.u. | F(i,j)<br>a.u. |
|----------------------|-------------------------|------------------|-------------------|----------------|
| 100. LP ( 2)Se 1     | /132. RY*( 4)Se 1       | 1.19             | 0.82              | 0.029          |
| 100. LP ( 2)Se 1     | /398. BD*( 1)Se 2 -Se 5 | 3.30             | 0.34              | 0.031          |
| 100. LP ( 2)Se 1     | /400. BD*( 1)Se 4 -Se 6 | 3.30             | 0.34              | 0.031          |
| 102. LP ( 2)Se 2     | /189. RY*( 1)Se 3       | 1.66             | 0.75              | 0.033          |
| 102. LP ( 2)Se 2     | /249. RY*( 1)Se 5       | 2.67             | 0.75              | 0.041          |
| 102. LP ( 2)Se 2     | /396. BD*( 1)Se 1 -Se 5 | 9.95             | 0.20              | 0.040          |
| 102. LP ( 2)Se 2     | /399. BD*( 1)Se 3 -Se 6 | 6.63             | 0.24              | 0.036          |
| 104. LP ( 2)Se 3     | /398. BD*( 1)Se 2 -Se 5 | 3.01             | 0.29              | 0.027          |
| 104. LP ( 2)Se 3     | /400. BD*( 1)Se 4 -Se 6 | 3.01             | 0.29              | 0.027          |
| 106. LP ( 2)Se 4     | /279. RY*( 1)Se 6       | 1.01             | 0.88              | 0.028          |
| 106. LP ( 2)Se 4     | /396. BD*( 1)Se 1 -Se 5 | 3.52             | 0.25              | 0.027          |
| 106. LP ( 2)Se 4     | /399. BD*( 1)Se 3 -Se 6 | 3.61             | 0.29              | 0.029          |
| 108. LP ( 2)Se 5     | /159. RY*( 1)Se 2       | 1.01             | 0.88              | 0.028          |
| 108. LP ( 2)Se 5     | /395. BD*( 1)Se 1 -Se 4 | 3.52             | 0.25              | 0.027          |
| 108. LP ( 2)Se 5     | /397. BD*( 1)Se 2 -Se 3 | 3.61             | 0.29              | 0.029          |
| 110. LP ( 2)Se 6     | /189. RY*( 1)Se 3       | 1.66             | 0.75              | 0.033          |
| 110. LP ( 2)Se 6     | /219. RY*( 1)Se 4       | 2.67             | 0.75              | 0.041          |
| 110. LP ( 2)Se 6     | /395. BD*( 1)Se 1 -Se 4 | 9.95             | 0.20              | 0.040          |
| 110. LP ( 2)Se 6     | /397. BD*( 1)Se 2 -Se 3 | 6.62             | 0.24              | 0.036          |
| 9. CR ( 3)Se 1       | /116. LP*( 6)Ag 7       | 1.27             | 10.63             | 0.108          |
| 9. CR ( 3)Se 1       | /117. LP*( 7)Ag 7       | 2.02             | 10.77             | 0.132          |
| 99. LP ( 1)Se 1      | /116. LP*( 6)Ag 7       | 3.53             | 0.76              | 0.048          |
| 99. LP ( 1)Se 1      | /117. LP*( 7)Ag 7       | 2.69             | 0.90              | 0.044          |
| 100. LP ( 2)Se 1     | /116. LP*( 6)Ag 7       | 42.01            | 0.37              | 0.113          |
| 100. LP ( 2)Se 1     | /117. LP*( 7)Ag 7       | 1.30             | 0.52              | 0.024          |
| 100. LP ( 2)Se 1     | /312. RY*( 4)Ag 7       | 7.03             | 2.08              | 0.114          |
| 100. LP ( 2)Se 1     | /314. RY*( 6)Ag 7       | 4.82             | 3.03              | 0.114          |
| 100. LP ( 2)Se 1     | /316. RY*( 8)Ag 7       | 6.83             | 38.62             | 0.483          |
| 100. LP ( 2)Se 1     | /317. RY*( 9)Ag 7       | 1.90             | 2.82              | 0.069          |
| 100. LP ( 2)Se 1     | /318. RY*( 10)Ag 7      | 1.64             | 2.48              | 0.060          |
| 100. LP ( 2)Se 1     | /321. RY*( 13)Ag 7      | 2.28             | 1.55              | 0.056          |
| 100. LP ( 2)Se 1     | /322. RY*( 14)Ag 7      | 1.33             | 2.79              | 0.057          |
| 1. BD ( 1)Se 1 -Se 4 | /128. LP*( 9)Ag 8       | 1.17             | 0.69              | 0.025          |
| 2. BD ( 1)Se 1 -Se 5 | /128. LP*( 9)Ag 8       | 1.17             | 0.69              | 0.025          |
| 3. BD ( 1)Se 2 -Se 3 | /125. LP*( 6)Ag 8       | 1.46             | 0.49              | 0.026          |

|      |     |        |       |   |       |            |   |       |       |       |
|------|-----|--------|-------|---|-------|------------|---|-------|-------|-------|
| 3.   | BD  | ( 1)Se | 2 -Se | 3 | /128. | LP*( 9)Ag  | 8 | 1.81  | 0.68  | 0.031 |
| 4.   | BD  | ( 1)Se | 2 -Se | 5 | /125. | LP*( 6)Ag  | 8 | 1.30  | 0.51  | 0.025 |
| 4.   | BD  | ( 1)Se | 2 -Se | 5 | /127. | LP*( 8)Ag  | 8 | 1.15  | 0.62  | 0.024 |
| 4.   | BD  | ( 1)Se | 2 -Se | 5 | /128. | LP*( 9)Ag  | 8 | 1.39  | 0.70  | 0.028 |
| 5.   | BD  | ( 1)Se | 3 -Se | 6 | /125. | LP*( 6)Ag  | 8 | 1.46  | 0.49  | 0.026 |
| 5.   | BD  | ( 1)Se | 3 -Se | 6 | /128. | LP*( 9)Ag  | 8 | 1.81  | 0.68  | 0.031 |
| 6.   | BD  | ( 1)Se | 4 -Se | 6 | /125. | LP*( 6)Ag  | 8 | 1.30  | 0.51  | 0.025 |
| 6.   | BD  | ( 1)Se | 4 -Se | 6 | /127. | LP*( 8)Ag  | 8 | 1.15  | 0.62  | 0.024 |
| 6.   | BD  | ( 1)Se | 4 -Se | 6 | /128. | LP*( 9)Ag  | 8 | 1.39  | 0.70  | 0.028 |
| 23.  | CR  | ( 3)Se | 2     |   | /128. | LP*( 9)Ag  | 8 | 1.32  | 10.62 | 0.106 |
| 37.  | CR  | ( 3)Se | 3     |   | /125. | LP*( 6)Ag  | 8 | 3.48  | 10.69 | 0.185 |
| 37.  | CR  | ( 3)Se | 3     |   | /126. | LP*( 7)Ag  | 8 | 3.58  | 10.81 | 0.177 |
| 37.  | CR  | ( 3)Se | 3     |   | /128. | LP*( 9)Ag  | 8 | 2.59  | 10.88 | 0.150 |
| 51.  | CR  | ( 3)Se | 4     |   | /125. | LP*( 6)Ag  | 8 | 2.64  | 10.64 | 0.161 |
| 51.  | CR  | ( 3)Se | 4     |   | /127. | LP*( 8)Ag  | 8 | 2.44  | 10.75 | 0.145 |
| 51.  | CR  | ( 3)Se | 4     |   | /128. | LP*( 9)Ag  | 8 | 1.75  | 10.83 | 0.123 |
| 65.  | CR  | ( 3)Se | 5     |   | /125. | LP*( 6)Ag  | 8 | 2.64  | 10.64 | 0.161 |
| 65.  | CR  | ( 3)Se | 5     |   | /127. | LP*( 8)Ag  | 8 | 2.44  | 10.75 | 0.145 |
| 65.  | CR  | ( 3)Se | 5     |   | /128. | LP*( 9)Ag  | 8 | 1.75  | 10.83 | 0.123 |
| 79.  | CR  | ( 3)Se | 6     |   | /128. | LP*( 9)Ag  | 8 | 1.32  | 10.62 | 0.106 |
| 99.  | LP  | ( 1)Se | 1     |   | /125. | LP*( 6)Ag  | 8 | 1.21  | 0.74  | 0.029 |
| 99.  | LP  | ( 1)Se | 1     |   | /128. | LP*( 9)Ag  | 8 | 1.34  | 0.92  | 0.031 |
| 101. | LP  | ( 1)Se | 2     |   | /125. | LP*( 6)Ag  | 8 | 1.77  | 0.75  | 0.035 |
| 101. | LP  | ( 1)Se | 2     |   | /128. | LP*( 9)Ag  | 8 | 2.13  | 0.94  | 0.040 |
| 103. | LP  | ( 1)Se | 3     |   | /125. | LP*( 6)Ag  | 8 | 7.05  | 0.74  | 0.069 |
| 103. | LP  | ( 1)Se | 3     |   | /126. | LP*( 7)Ag  | 8 | 6.39  | 0.86  | 0.066 |
| 103. | LP  | ( 1)Se | 3     |   | /128. | LP*( 9)Ag  | 8 | 3.48  | 0.93  | 0.051 |
| 104. | LP  | ( 2)Se | 3     |   | /125. | LP*( 6)Ag  | 8 | 36.01 | 0.30  | 0.095 |
| 104. | LP  | ( 2)Se | 3     |   | /126. | LP*( 7)Ag  | 8 | 6.96  | 0.41  | 0.050 |
| 104. | LP  | ( 2)Se | 3     |   | /128. | LP*( 9)Ag  | 8 | 1.65  | 0.49  | 0.026 |
| 104. | LP  | ( 2)Se | 3     |   | /354. | RY*( 3)Ag  | 8 | 3.05  | 2.25  | 0.077 |
| 104. | LP  | ( 2)Se | 3     |   | /359. | RY*( 8)Ag  | 8 | 3.73  | 41.74 | 0.368 |
| 105. | LP  | ( 1)Se | 4     |   | /125. | LP*( 6)Ag  | 8 | 5.65  | 0.77  | 0.063 |
| 105. | LP  | ( 1)Se | 4     |   | /126. | LP*( 7)Ag  | 8 | 1.82  | 0.88  | 0.036 |
| 105. | LP  | ( 1)Se | 4     |   | /127. | LP*( 8)Ag  | 8 | 4.42  | 0.87  | 0.055 |
| 105. | LP  | ( 1)Se | 4     |   | /128. | LP*( 9)Ag  | 8 | 2.47  | 0.95  | 0.043 |
| 106. | LP  | ( 2)Se | 4     |   | /125. | LP*( 6)Ag  | 8 | 22.69 | 0.30  | 0.076 |
| 106. | LP  | ( 2)Se | 4     |   | /126. | LP*( 7)Ag  | 8 | 1.45  | 0.41  | 0.022 |
| 106. | LP  | ( 2)Se | 4     |   | /127. | LP*( 8)Ag  | 8 | 3.71  | 0.41  | 0.036 |
| 106. | LP  | ( 2)Se | 4     |   | /128. | LP*( 9)Ag  | 8 | 1.03  | 0.49  | 0.021 |
| 106. | LP  | ( 2)Se | 4     |   | /354. | RY*( 3)Ag  | 8 | 1.48  | 2.25  | 0.053 |
| 106. | LP  | ( 2)Se | 4     |   | /359. | RY*( 8)Ag  | 8 | 1.88  | 41.74 | 0.259 |
| 107. | LP  | ( 1)Se | 5     |   | /125. | LP*( 6)Ag  | 8 | 5.65  | 0.77  | 0.063 |
| 107. | LP  | ( 1)Se | 5     |   | /126. | LP*( 7)Ag  | 8 | 1.82  | 0.88  | 0.036 |
| 107. | LP  | ( 1)Se | 5     |   | /127. | LP*( 8)Ag  | 8 | 4.42  | 0.87  | 0.055 |
| 107. | LP  | ( 1)Se | 5     |   | /128. | LP*( 9)Ag  | 8 | 2.47  | 0.95  | 0.043 |
| 108. | LP  | ( 2)Se | 5     |   | /125. | LP*( 6)Ag  | 8 | 22.67 | 0.30  | 0.076 |
| 108. | LP  | ( 2)Se | 5     |   | /126. | LP*( 7)Ag  | 8 | 1.44  | 0.41  | 0.022 |
| 108. | LP  | ( 2)Se | 5     |   | /127. | LP*( 8)Ag  | 8 | 3.71  | 0.41  | 0.036 |
| 108. | LP  | ( 2)Se | 5     |   | /128. | LP*( 9)Ag  | 8 | 1.03  | 0.49  | 0.021 |
| 108. | LP  | ( 2)Se | 5     |   | /354. | RY*( 3)Ag  | 8 | 1.48  | 2.25  | 0.053 |
| 108. | LP  | ( 2)Se | 5     |   | /359. | RY*( 8)Ag  | 8 | 1.88  | 41.74 | 0.259 |
| 109. | LP  | ( 1)Se | 6     |   | /125. | LP*( 6)Ag  | 8 | 1.77  | 0.75  | 0.035 |
| 109. | LP  | ( 1)Se | 6     |   | /128. | LP*( 9)Ag  | 8 | 2.13  | 0.94  | 0.040 |
| 116. | LP* | ( 6)Ag | 7     |   | /132. | RY*( 4)Se  | 1 | 2.98  | 0.45  | 0.112 |
| 116. | LP* | ( 6)Ag | 7     |   | /133. | RY*( 5)Se  | 1 | 1.06  | 0.55  | 0.074 |
| 116. | LP* | ( 6)Ag | 7     |   | /117. | LP*( 7)Ag  | 7 | 2.67  | 0.14  | 0.059 |
| 116. | LP* | ( 6)Ag | 7     |   | /119. | LP*( 9)Ag  | 7 | 1.08  | 0.43  | 0.067 |
| 116. | LP* | ( 6)Ag | 7     |   | /312. | RY*( 4)Ag  | 7 | 9.41  | 1.71  | 0.391 |
| 116. | LP* | ( 6)Ag | 7     |   | /314. | RY*( 6)Ag  | 7 | 6.16  | 2.66  | 0.394 |
| 116. | LP* | ( 6)Ag | 7     |   | /316. | RY*( 8)Ag  | 7 | 7.67  | 38.24 | 1.670 |
| 116. | LP* | ( 6)Ag | 7     |   | /317. | RY*( 9)Ag  | 7 | 2.48  | 2.45  | 0.240 |
| 116. | LP* | ( 6)Ag | 7     |   | /318. | RY*( 10)Ag | 7 | 2.16  | 2.11  | 0.208 |
| 116. | LP* | ( 6)Ag | 7     |   | /321. | RY*( 13)Ag | 7 | 3.46  | 1.17  | 0.196 |
| 116. | LP* | ( 6)Ag | 7     |   | /322. | RY*( 14)Ag | 7 | 1.78  | 2.42  | 0.202 |
| 125. | LP* | ( 6)Ag | 8     |   | /196. | RY*( 8)Se  | 3 | 1.39  | 0.59  | 0.069 |
| 125. | LP* | ( 6)Ag | 8     |   | /116. | LP*( 6)Ag  | 7 | 4.54  | 0.03  | 0.021 |
| 125. | LP* | ( 6)Ag | 8     |   | /128. | LP*( 9)Ag  | 8 | 5.65  | 0.19  | 0.077 |
| 125. | LP* | ( 6)Ag | 8     |   | /354. | RY*( 3)Ag  | 8 | 5.22  | 1.95  | 0.243 |
| 125. | LP* | ( 6)Ag | 8     |   | /355. | RY*( 4)Ag  | 8 | 1.30  | 0.59  | 0.067 |
| 125. | LP* | ( 6)Ag | 8     |   | /359. | RY*( 8)Ag  | 8 | 6.70  | 41.44 | 1.271 |
| 125. | LP* | ( 6)Ag | 8     |   | /368. | RY*( 17)Ag | 8 | 2.99  | 3.92  | 0.261 |

Wiberg bond index matrix in the NAO basis:

| Atom  | 1      | 2      | 3      | 4      | 5      | 6      | 7      | 8      |
|-------|--------|--------|--------|--------|--------|--------|--------|--------|
| 1. Se | 0.0000 | 0.0966 | 0.0103 | 0.9316 | 0.9317 | 0.0966 | 0.2996 | 0.0249 |
| 2. Se | 0.0966 | 0.0000 | 1.0111 | 0.0140 | 1.0672 | 0.0881 | 0.0194 | 0.0349 |
| 3. Se | 0.0103 | 1.0111 | 0.0000 | 0.0704 | 0.0704 | 1.0110 | 0.0017 | 0.2281 |
| 4. Se | 0.9316 | 0.0140 | 0.0704 | 0.0000 | 0.0751 | 1.0673 | 0.0135 | 0.1671 |
| 5. Se | 0.9317 | 1.0672 | 0.0704 | 0.0751 | 0.0000 | 0.0140 | 0.0135 | 0.1670 |

|       |        |        |        |        |        |        |        |        |
|-------|--------|--------|--------|--------|--------|--------|--------|--------|
| 6. Se | 0.0966 | 0.0881 | 1.0110 | 1.0673 | 0.0140 | 0.0000 | 0.0194 | 0.0349 |
| 7. Ag | 0.2996 | 0.0194 | 0.0017 | 0.0135 | 0.0135 | 0.0194 | 0.0000 | 0.0025 |
| 8. Ag | 0.0249 | 0.0349 | 0.2281 | 0.1671 | 0.1670 | 0.0349 | 0.0025 | 0.0000 |

Summary of Natural Population Analysis:

| Atom No   | Natural Population |           |          |         |           |
|-----------|--------------------|-----------|----------|---------|-----------|
|           | Natural Charge     | Core      | Valence  | Rydberg | Total     |
| 1 se      | -0.07543           | 27.99936  | 6.00941  | 0.06666 | 34.07543  |
| 2 se      | 0.18248            | 27.99930  | 5.76975  | 0.04846 | 33.81752  |
| 3 se      | 0.02339            | 27.99931  | 5.91125  | 0.06604 | 33.97661  |
| 4 se      | 0.04050            | 27.99932  | 5.90152  | 0.05866 | 33.95950  |
| 5 se      | 0.04056            | 27.99932  | 5.90147  | 0.05865 | 33.95944  |
| 6 se      | 0.18248            | 27.99930  | 5.76976  | 0.04845 | 33.81752  |
| 7 ag      | 0.85302            | 7.99893   | 10.14128 | 0.00678 | 18.14698  |
| 8 ag      | 0.75300            | 7.99923   | 10.22596 | 0.02181 | 18.24700  |
| * Total * | 2.00000            | 183.99408 | 55.63041 | 0.37551 | 240.00000 |

For all atoms:

|                       |            |          |    |      |
|-----------------------|------------|----------|----|------|
| Core                  | 183.99408( | 99.9968% | of | 184) |
| Valence               | 55.63041(  | 99.3400% | of | 56)  |
| Natural Minimal Basis | 239.62449( | 99.8435% | of | 240) |
| Natural Rydberg Basis | 0.37551(   | 0.1565%  | of | 240) |

```
*****
*
*      atomic charges with multicenter corrections
*
*****
```

| atom | charge |
|------|--------|
| 1 se | 0.3577 |
| 2 se | 0.1626 |
| 3 se | 0.2303 |
| 4 se | 0.1456 |
| 5 se | 0.1455 |
| 6 se | 0.1626 |
| 7 ag | 0.4420 |
| 8 ag | 0.3538 |

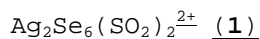

Second Order Perturbation Theory Analysis of Fock Matrix in NBO Basis

Threshold for printing: 1.00 kcal/mol  
(Intermolecular threshold: 0.05 kcal/mol)

| Donor NBO (i)        | Acceptor NBO (j)        | E(2)<br>kcal/mol | E(j)-E(i)<br>a.u. | F(i,j)<br>a.u. |
|----------------------|-------------------------|------------------|-------------------|----------------|
| 120. LP ( 2)Se 1     | /167. RY*( 7)Se 1       | 1.02             | 1.11              | 0.031          |
| 120. LP ( 2)Se 1     | /600. BD*( 1)Se 2 -Se 5 | 2.65             | 0.31              | 0.026          |
| 120. LP ( 2)Se 1     | /602. BD*( 1)Se 4 -Se 6 | 2.64             | 0.31              | 0.026          |
| 122. LP ( 2)Se 2     | /221. RY*( 1)Se 3       | 1.17             | 0.81              | 0.029          |
| 122. LP ( 2)Se 2     | /281. RY*( 1)Se 5       | 1.34             | 0.84              | 0.031          |
| 122. LP ( 2)Se 2     | /598. BD*( 1)Se 1 -Se 5 | 4.33             | 0.26              | 0.031          |
| 122. LP ( 2)Se 2     | /601. BD*( 1)Se 3 -Se 6 | 4.29             | 0.26              | 0.030          |
| 124. LP ( 2)Se 3     | /227. RY*( 7)Se 3       | 1.07             | 1.12              | 0.032          |
| 124. LP ( 2)Se 3     | /600. BD*( 1)Se 2 -Se 5 | 2.58             | 0.31              | 0.026          |
| 124. LP ( 2)Se 3     | /602. BD*( 1)Se 4 -Se 6 | 2.59             | 0.31              | 0.026          |
| 126. LP ( 2)Se 4     | /161. RY*( 1)Se 1       | 1.16             | 0.81              | 0.028          |
| 126. LP ( 2)Se 4     | /311. RY*( 1)Se 6       | 1.36             | 0.84              | 0.031          |
| 126. LP ( 2)Se 4     | /598. BD*( 1)Se 1 -Se 5 | 4.33             | 0.26              | 0.031          |
| 126. LP ( 2)Se 4     | /601. BD*( 1)Se 3 -Se 6 | 4.39             | 0.26              | 0.031          |
| 128. LP ( 2)Se 5     | /161. RY*( 1)Se 1       | 1.10             | 0.82              | 0.028          |
| 128. LP ( 2)Se 5     | /191. RY*( 1)Se 2       | 1.32             | 0.85              | 0.031          |
| 128. LP ( 2)Se 5     | /597. BD*( 1)Se 1 -Se 4 | 4.09             | 0.27              | 0.030          |
| 128. LP ( 2)Se 5     | /599. BD*( 1)Se 2 -Se 3 | 4.13             | 0.27              | 0.030          |
| 130. LP ( 2)Se 6     | /221. RY*( 1)Se 3       | 1.09             | 0.82              | 0.028          |
| 130. LP ( 2)Se 6     | /251. RY*( 1)Se 4       | 1.30             | 0.85              | 0.031          |
| 130. LP ( 2)Se 6     | /597. BD*( 1)Se 1 -Se 4 | 4.04             | 0.27              | 0.030          |
| 130. LP ( 2)Se 6     | /599. BD*( 1)Se 2 -Se 3 | 4.02             | 0.27              | 0.030          |
| 1. BD ( 1)Se 1 -Se 4 | /136. LP*( 6)Ag 7       | 1.96             | 0.50              | 0.030          |
| 1. BD ( 1)Se 1 -Se 4 | /137. LP*( 7)Ag 7       | 2.06             | 0.65              | 0.033          |
| 1. BD ( 1)Se 1 -Se 4 | /138. LP*( 8)Ag 7       | 1.65             | 0.62              | 0.029          |

|      |    |        |       |   |       |            |   |       |       |       |
|------|----|--------|-------|---|-------|------------|---|-------|-------|-------|
| 2.   | BD | ( 1)Se | 1 -Se | 5 | /136. | LP*( 6)Ag  | 7 | 1.86  | 0.49  | 0.029 |
| 2.   | BD | ( 1)Se | 1 -Se | 5 | /137. | LP*( 7)Ag  | 7 | 2.10  | 0.65  | 0.034 |
| 2.   | BD | ( 1)Se | 1 -Se | 5 | /138. | LP*( 8)Ag  | 7 | 1.65  | 0.62  | 0.029 |
| 3.   | BD | ( 1)Se | 2 -Se | 3 | /136. | LP*( 6)Ag  | 7 | 1.12  | 0.50  | 0.023 |
| 3.   | BD | ( 1)Se | 2 -Se | 3 | /137. | LP*( 7)Ag  | 7 | 2.05  | 0.65  | 0.033 |
| 4.   | BD | ( 1)Se | 2 -Se | 5 | /136. | LP*( 6)Ag  | 7 | 1.47  | 0.50  | 0.026 |
| 4.   | BD | ( 1)Se | 2 -Se | 5 | /137. | LP*( 7)Ag  | 7 | 2.17  | 0.65  | 0.034 |
| 4.   | BD | ( 1)Se | 2 -Se | 5 | /139. | LP*( 9)Ag  | 7 | 1.29  | 0.60  | 0.025 |
| 5.   | BD | ( 1)Se | 3 -Se | 6 | /136. | LP*( 6)Ag  | 7 | 1.16  | 0.49  | 0.023 |
| 5.   | BD | ( 1)Se | 3 -Se | 6 | /137. | LP*( 7)Ag  | 7 | 2.00  | 0.65  | 0.033 |
| 6.   | BD | ( 1)Se | 4 -Se | 6 | /136. | LP*( 6)Ag  | 7 | 1.60  | 0.50  | 0.027 |
| 6.   | BD | ( 1)Se | 4 -Se | 6 | /137. | LP*( 7)Ag  | 7 | 2.09  | 0.65  | 0.034 |
| 6.   | BD | ( 1)Se | 4 -Se | 6 | /139. | LP*( 9)Ag  | 7 | 1.48  | 0.60  | 0.027 |
| 15.  | CR | ( 3)Se | 1     |   | /136. | LP*( 6)Ag  | 7 | 4.20  | 10.67 | 0.204 |
| 15.  | CR | ( 3)Se | 1     |   | /137. | LP*( 7)Ag  | 7 | 2.77  | 10.82 | 0.158 |
| 15.  | CR | ( 3)Se | 1     |   | /138. | LP*( 8)Ag  | 7 | 5.30  | 10.79 | 0.216 |
| 29.  | CR | ( 3)Se | 2     |   | /136. | LP*( 6)Ag  | 7 | 2.36  | 10.62 | 0.152 |
| 29.  | CR | ( 3)Se | 2     |   | /137. | LP*( 7)Ag  | 7 | 3.10  | 10.77 | 0.167 |
| 29.  | CR | ( 3)Se | 2     |   | /139. | LP*( 9)Ag  | 7 | 2.51  | 10.73 | 0.148 |
| 43.  | CR | ( 3)Se | 3     |   | /137. | LP*( 7)Ag  | 7 | 1.17  | 10.83 | 0.103 |
| 57.  | CR | ( 3)Se | 4     |   | /137. | LP*( 7)Ag  | 7 | 1.30  | 10.77 | 0.108 |
| 71.  | CR | ( 3)Se | 5     |   | /137. | LP*( 7)Ag  | 7 | 1.33  | 10.78 | 0.109 |
| 85.  | CR | ( 3)Se | 6     |   | /136. | LP*( 6)Ag  | 7 | 2.59  | 10.63 | 0.160 |
| 85.  | CR | ( 3)Se | 6     |   | /137. | LP*( 7)Ag  | 7 | 2.95  | 10.78 | 0.163 |
| 85.  | CR | ( 3)Se | 6     |   | /139. | LP*( 9)Ag  | 7 | 2.76  | 10.73 | 0.155 |
| 119. | LP | ( 1)Se | 1     |   | /136. | LP*( 6)Ag  | 7 | 7.69  | 0.73  | 0.072 |
| 119. | LP | ( 1)Se | 1     |   | /137. | LP*( 7)Ag  | 7 | 3.30  | 0.88  | 0.049 |
| 119. | LP | ( 1)Se | 1     |   | /138. | LP*( 8)Ag  | 7 | 9.62  | 0.85  | 0.081 |
| 120. | LP | ( 2)Se | 1     |   | /136. | LP*( 6)Ag  | 7 | 41.83 | 0.31  | 0.105 |
| 120. | LP | ( 2)Se | 1     |   | /137. | LP*( 7)Ag  | 7 | 3.23  | 0.46  | 0.035 |
| 120. | LP | ( 2)Se | 1     |   | /138. | LP*( 8)Ag  | 7 | 8.64  | 0.43  | 0.056 |
| 120. | LP | ( 2)Se | 1     |   | /345. | RY*( 5)Ag  | 7 | 1.72  | 2.52  | 0.062 |
| 120. | LP | ( 2)Se | 1     |   | /350. | RY*( 10)Ag | 7 | 1.78  | 3.14  | 0.070 |
| 120. | LP | ( 2)Se | 1     |   | /351. | RY*( 11)Ag | 7 | 1.39  | 3.69  | 0.067 |
| 120. | LP | ( 2)Se | 1     |   | /352. | RY*( 12)Ag | 7 | 2.82  | 4.45  | 0.105 |
| 120. | LP | ( 2)Se | 1     |   | /353. | RY*( 13)Ag | 7 | 2.39  | 5.16  | 0.104 |
| 120. | LP | ( 2)Se | 1     |   | /357. | RY*( 17)Ag | 7 | 3.59  | 34.19 | 0.327 |
| 121. | LP | ( 1)Se | 2     |   | /136. | LP*( 6)Ag  | 7 | 5.32  | 0.76  | 0.061 |
| 121. | LP | ( 1)Se | 2     |   | /137. | LP*( 7)Ag  | 7 | 4.45  | 0.91  | 0.058 |
| 121. | LP | ( 1)Se | 2     |   | /138. | LP*( 8)Ag  | 7 | 1.57  | 0.88  | 0.033 |
| 121. | LP | ( 1)Se | 2     |   | /139. | LP*( 9)Ag  | 7 | 5.09  | 0.87  | 0.059 |
| 122. | LP | ( 2)Se | 2     |   | /136. | LP*( 6)Ag  | 7 | 20.22 | 0.27  | 0.068 |
| 122. | LP | ( 2)Se | 2     |   | /137. | LP*( 7)Ag  | 7 | 3.72  | 0.42  | 0.036 |
| 122. | LP | ( 2)Se | 2     |   | /138. | LP*( 8)Ag  | 7 | 1.47  | 0.39  | 0.022 |
| 122. | LP | ( 2)Se | 2     |   | /139. | LP*( 9)Ag  | 7 | 4.30  | 0.38  | 0.037 |
| 122. | LP | ( 2)Se | 2     |   | /353. | RY*( 13)Ag | 7 | 1.23  | 5.11  | 0.074 |
| 122. | LP | ( 2)Se | 2     |   | /357. | RY*( 17)Ag | 7 | 1.24  | 34.15 | 0.191 |
| 123. | LP | ( 1)Se | 3     |   | /137. | LP*( 7)Ag  | 7 | 1.48  | 0.88  | 0.033 |
| 125. | LP | ( 1)Se | 4     |   | /136. | LP*( 6)Ag  | 7 | 1.34  | 0.76  | 0.030 |
| 125. | LP | ( 1)Se | 4     |   | /137. | LP*( 7)Ag  | 7 | 1.81  | 0.91  | 0.037 |
| 125. | LP | ( 1)Se | 4     |   | /139. | LP*( 9)Ag  | 7 | 1.02  | 0.87  | 0.027 |
| 127. | LP | ( 1)Se | 5     |   | /136. | LP*( 6)Ag  | 7 | 1.25  | 0.76  | 0.029 |
| 127. | LP | ( 1)Se | 5     |   | /137. | LP*( 7)Ag  | 7 | 1.82  | 0.91  | 0.037 |
| 129. | LP | ( 1)Se | 6     |   | /136. | LP*( 6)Ag  | 7 | 5.64  | 0.76  | 0.062 |
| 129. | LP | ( 1)Se | 6     |   | /137. | LP*( 7)Ag  | 7 | 4.10  | 0.91  | 0.055 |
| 129. | LP | ( 1)Se | 6     |   | /138. | LP*( 8)Ag  | 7 | 1.78  | 0.88  | 0.035 |
| 129. | LP | ( 1)Se | 6     |   | /139. | LP*( 9)Ag  | 7 | 5.41  | 0.86  | 0.061 |
| 130. | LP | ( 2)Se | 6     |   | /136. | LP*( 6)Ag  | 7 | 22.78 | 0.28  | 0.073 |
| 130. | LP | ( 2)Se | 6     |   | /137. | LP*( 7)Ag  | 7 | 3.57  | 0.43  | 0.035 |
| 130. | LP | ( 2)Se | 6     |   | /138. | LP*( 8)Ag  | 7 | 1.78  | 0.40  | 0.024 |
| 130. | LP | ( 2)Se | 6     |   | /139. | LP*( 9)Ag  | 7 | 4.57  | 0.38  | 0.038 |
| 130. | LP | ( 2)Se | 6     |   | /353. | RY*( 13)Ag | 7 | 1.49  | 5.12  | 0.081 |
| 130. | LP | ( 2)Se | 6     |   | /357. | RY*( 17)Ag | 7 | 1.48  | 34.15 | 0.209 |
| 1.   | BD | ( 1)Se | 1 -Se | 4 | /145. | LP*( 6)Ag  | 8 | 1.09  | 0.49  | 0.022 |
| 1.   | BD | ( 1)Se | 1 -Se | 4 | /146. | LP*( 7)Ag  | 8 | 2.03  | 0.65  | 0.033 |
| 2.   | BD | ( 1)Se | 1 -Se | 5 | /145. | LP*( 6)Ag  | 8 | 1.13  | 0.49  | 0.023 |
| 2.   | BD | ( 1)Se | 1 -Se | 5 | /146. | LP*( 7)Ag  | 8 | 1.96  | 0.65  | 0.032 |
| 3.   | BD | ( 1)Se | 2 -Se | 3 | /145. | LP*( 6)Ag  | 8 | 1.96  | 0.49  | 0.030 |
| 3.   | BD | ( 1)Se | 2 -Se | 3 | /146. | LP*( 7)Ag  | 8 | 2.10  | 0.65  | 0.034 |
| 3.   | BD | ( 1)Se | 2 -Se | 3 | /147. | LP*( 8)Ag  | 8 | 1.64  | 0.62  | 0.029 |
| 4.   | BD | ( 1)Se | 2 -Se | 5 | /145. | LP*( 6)Ag  | 8 | 1.57  | 0.50  | 0.027 |
| 4.   | BD | ( 1)Se | 2 -Se | 5 | /146. | LP*( 7)Ag  | 8 | 2.07  | 0.65  | 0.033 |
| 4.   | BD | ( 1)Se | 2 -Se | 5 | /148. | LP*( 9)Ag  | 8 | 1.49  | 0.60  | 0.027 |
| 5.   | BD | ( 1)Se | 3 -Se | 6 | /145. | LP*( 6)Ag  | 8 | 1.86  | 0.49  | 0.029 |
| 5.   | BD | ( 1)Se | 3 -Se | 6 | /146. | LP*( 7)Ag  | 8 | 2.15  | 0.65  | 0.034 |
| 5.   | BD | ( 1)Se | 3 -Se | 6 | /147. | LP*( 8)Ag  | 8 | 1.63  | 0.62  | 0.028 |
| 6.   | BD | ( 1)Se | 4 -Se | 6 | /145. | LP*( 6)Ag  | 8 | 1.45  | 0.50  | 0.026 |
| 6.   | BD | ( 1)Se | 4 -Se | 6 | /146. | LP*( 7)Ag  | 8 | 2.18  | 0.65  | 0.034 |
| 6.   | BD | ( 1)Se | 4 -Se | 6 | /148. | LP*( 9)Ag  | 8 | 1.27  | 0.60  | 0.025 |
| 15.  | CR | ( 3)Se | 1     |   | /146. | LP*( 7)Ag  | 8 | 1.15  | 10.82 | 0.102 |
| 29.  | CR | ( 3)Se | 2     |   | /146. | LP*( 7)Ag  | 8 | 1.31  | 10.77 | 0.108 |
| 43.  | CR | ( 3)Se | 3     |   | /145. | LP*( 6)Ag  | 8 | 4.24  | 10.68 | 0.205 |

|      |     |        |    |       |            |    |       |       |       |
|------|-----|--------|----|-------|------------|----|-------|-------|-------|
| 43.  | CR  | ( 3)Se | 3  | /146. | LP*( 7)Ag  | 8  | 2.85  | 10.83 | 0.161 |
| 43.  | CR  | ( 3)Se | 3  | /147. | LP*( 8)Ag  | 8  | 5.31  | 10.80 | 0.216 |
| 57.  | CR  | ( 3)Se | 4  | /145. | LP*( 6)Ag  | 8  | 2.32  | 10.62 | 0.151 |
| 57.  | CR  | ( 3)Se | 4  | /146. | LP*( 7)Ag  | 8  | 3.11  | 10.77 | 0.167 |
| 57.  | CR  | ( 3)Se | 4  | /148. | LP*( 9)Ag  | 8  | 2.44  | 10.73 | 0.145 |
| 71.  | CR  | ( 3)Se | 5  | /145. | LP*( 6)Ag  | 8  | 2.52  | 10.62 | 0.157 |
| 71.  | CR  | ( 3)Se | 5  | /146. | LP*( 7)Ag  | 8  | 2.90  | 10.78 | 0.161 |
| 71.  | CR  | ( 3)Se | 5  | /148. | LP*( 9)Ag  | 8  | 2.77  | 10.73 | 0.155 |
| 85.  | CR  | ( 3)Se | 6  | /146. | LP*( 7)Ag  | 8  | 1.36  | 10.78 | 0.111 |
| 119. | LP  | ( 1)Se | 1  | /146. | LP*( 7)Ag  | 8  | 1.45  | 0.88  | 0.032 |
| 121. | LP  | ( 1)Se | 2  | /145. | LP*( 6)Ag  | 8  | 1.33  | 0.76  | 0.030 |
| 121. | LP  | ( 1)Se | 2  | /146. | LP*( 7)Ag  | 8  | 1.82  | 0.91  | 0.037 |
| 121. | LP  | ( 1)Se | 2  | /148. | LP*( 9)Ag  | 8  | 1.02  | 0.87  | 0.027 |
| 123. | LP  | ( 1)Se | 3  | /145. | LP*( 6)Ag  | 8  | 7.72  | 0.73  | 0.072 |
| 123. | LP  | ( 1)Se | 3  | /146. | LP*( 7)Ag  | 8  | 3.39  | 0.88  | 0.050 |
| 123. | LP  | ( 1)Se | 3  | /147. | LP*( 8)Ag  | 8  | 9.62  | 0.85  | 0.081 |
| 124. | LP  | ( 2)Se | 3  | /145. | LP*( 6)Ag  | 8  | 42.65 | 0.31  | 0.106 |
| 124. | LP  | ( 2)Se | 3  | /146. | LP*( 7)Ag  | 8  | 3.34  | 0.46  | 0.036 |
| 124. | LP  | ( 2)Se | 3  | /147. | LP*( 8)Ag  | 8  | 8.65  | 0.44  | 0.057 |
| 124. | LP  | ( 2)Se | 3  | /388. | RY*( 5)Ag  | 8  | 1.74  | 2.48  | 0.061 |
| 124. | LP  | ( 2)Se | 3  | /392. | RY*( 9)Ag  | 8  | 1.68  | 2.96  | 0.066 |
| 124. | LP  | ( 2)Se | 3  | /394. | RY*( 11)Ag | 8  | 1.41  | 3.71  | 0.068 |
| 124. | LP  | ( 2)Se | 3  | /395. | RY*( 12)Ag | 8  | 2.89  | 4.39  | 0.105 |
| 124. | LP  | ( 2)Se | 3  | /396. | RY*( 13)Ag | 8  | 2.60  | 5.35  | 0.110 |
| 124. | LP  | ( 2)Se | 3  | /400. | RY*( 17)Ag | 8  | 3.71  | 33.99 | 0.332 |
| 125. | LP  | ( 1)Se | 4  | /145. | LP*( 6)Ag  | 8  | 5.26  | 0.76  | 0.060 |
| 125. | LP  | ( 1)Se | 4  | /146. | LP*( 7)Ag  | 8  | 4.47  | 0.91  | 0.058 |
| 125. | LP  | ( 1)Se | 4  | /147. | LP*( 8)Ag  | 8  | 1.67  | 0.88  | 0.034 |
| 125. | LP  | ( 1)Se | 4  | /148. | LP*( 9)Ag  | 8  | 4.95  | 0.87  | 0.058 |
| 126. | LP  | ( 2)Se | 4  | /145. | LP*( 6)Ag  | 8  | 19.88 | 0.27  | 0.068 |
| 126. | LP  | ( 2)Se | 4  | /146. | LP*( 7)Ag  | 8  | 3.70  | 0.42  | 0.036 |
| 126. | LP  | ( 2)Se | 4  | /147. | LP*( 8)Ag  | 8  | 1.54  | 0.39  | 0.023 |
| 126. | LP  | ( 2)Se | 4  | /148. | LP*( 9)Ag  | 8  | 4.14  | 0.38  | 0.036 |
| 126. | LP  | ( 2)Se | 4  | /396. | RY*( 13)Ag | 8  | 1.26  | 5.30  | 0.076 |
| 126. | LP  | ( 2)Se | 4  | /400. | RY*( 17)Ag | 8  | 1.21  | 33.95 | 0.188 |
| 127. | LP  | ( 1)Se | 5  | /145. | LP*( 6)Ag  | 8  | 5.55  | 0.76  | 0.062 |
| 127. | LP  | ( 1)Se | 5  | /146. | LP*( 7)Ag  | 8  | 4.04  | 0.91  | 0.055 |
| 127. | LP  | ( 1)Se | 5  | /147. | LP*( 8)Ag  | 8  | 1.74  | 0.88  | 0.035 |
| 127. | LP  | ( 1)Se | 5  | /148. | LP*( 9)Ag  | 8  | 5.43  | 0.86  | 0.061 |
| 128. | LP  | ( 2)Se | 5  | /145. | LP*( 6)Ag  | 8  | 22.06 | 0.27  | 0.072 |
| 128. | LP  | ( 2)Se | 5  | /146. | LP*( 7)Ag  | 8  | 3.47  | 0.42  | 0.035 |
| 128. | LP  | ( 2)Se | 5  | /147. | LP*( 8)Ag  | 8  | 1.71  | 0.39  | 0.024 |
| 128. | LP  | ( 2)Se | 5  | /148. | LP*( 9)Ag  | 8  | 4.53  | 0.38  | 0.038 |
| 128. | LP  | ( 2)Se | 5  | /396. | RY*( 13)Ag | 8  | 1.44  | 5.31  | 0.081 |
| 128. | LP  | ( 2)Se | 5  | /400. | RY*( 17)Ag | 8  | 1.41  | 33.95 | 0.203 |
| 129. | LP  | ( 1)Se | 6  | /145. | LP*( 6)Ag  | 8  | 1.25  | 0.76  | 0.029 |
| 129. | LP  | ( 1)Se | 6  | /146. | LP*( 7)Ag  | 8  | 1.86  | 0.91  | 0.037 |
| 136. | LP* | ( 6)Ag | 7  | /165. | RY*( 5)Se  | 1  | 1.60  | 0.60  | 0.074 |
| 136. | LP* | ( 6)Ag | 7  | /167. | RY*( 7)Se  | 1  | 1.68  | 0.80  | 0.088 |
| 136. | LP* | ( 6)Ag | 7  | /137. | LP*( 7)Ag  | 7  | 2.17  | 0.15  | 0.037 |
| 136. | LP* | ( 6)Ag | 7  | /345. | RY*( 5)Ag  | 7  | 3.14  | 2.21  | 0.199 |
| 136. | LP* | ( 6)Ag | 7  | /350. | RY*( 10)Ag | 7  | 3.39  | 2.82  | 0.233 |
| 136. | LP* | ( 6)Ag | 7  | /351. | RY*( 11)Ag | 7  | 2.35  | 3.38  | 0.212 |
| 136. | LP* | ( 6)Ag | 7  | /352. | RY*( 12)Ag | 7  | 4.50  | 4.13  | 0.325 |
| 136. | LP* | ( 6)Ag | 7  | /353. | RY*( 13)Ag | 7  | 5.06  | 4.84  | 0.374 |
| 136. | LP* | ( 6)Ag | 7  | /355. | RY*( 15)Ag | 7  | 1.69  | 2.46  | 0.154 |
| 136. | LP* | ( 6)Ag | 7  | /357. | RY*( 17)Ag | 7  | 5.26  | 33.88 | 1.007 |
| 136. | LP* | ( 6)Ag | 7  | /146. | LP*( 7)Ag  | 8  | 3.06  | 0.15  | 0.044 |
| 136. | LP* | ( 6)Ag | 7  | /486. | RY*( 1) O  | 11 | 1.17  | 0.96  | 0.079 |
| 145. | LP* | ( 6)Ag | 8  | /225. | RY*( 5)Se  | 3  | 1.64  | 0.60  | 0.075 |
| 145. | LP* | ( 6)Ag | 8  | /227. | RY*( 7)Se  | 3  | 1.73  | 0.80  | 0.089 |
| 145. | LP* | ( 6)Ag | 8  | /137. | LP*( 7)Ag  | 7  | 3.02  | 0.15  | 0.044 |
| 145. | LP* | ( 6)Ag | 8  | /146. | LP*( 7)Ag  | 8  | 2.13  | 0.15  | 0.037 |
| 145. | LP* | ( 6)Ag | 8  | /388. | RY*( 5)Ag  | 8  | 3.07  | 2.17  | 0.195 |
| 145. | LP* | ( 6)Ag | 8  | /392. | RY*( 9)Ag  | 8  | 3.12  | 2.64  | 0.216 |
| 145. | LP* | ( 6)Ag | 8  | /394. | RY*( 11)Ag | 8  | 2.35  | 3.39  | 0.213 |
| 145. | LP* | ( 6)Ag | 8  | /395. | RY*( 12)Ag | 8  | 4.39  | 4.08  | 0.319 |
| 145. | LP* | ( 6)Ag | 8  | /396. | RY*( 13)Ag | 8  | 5.24  | 5.03  | 0.387 |
| 145. | LP* | ( 6)Ag | 8  | /398. | RY*( 15)Ag | 8  | 1.30  | 2.39  | 0.133 |
| 145. | LP* | ( 6)Ag | 8  | /400. | RY*( 17)Ag | 8  | 5.27  | 33.68 | 1.004 |
| 145. | LP* | ( 6)Ag | 8  | /403. | RY*( 20)Ag | 8  | 1.08  | 2.57  | 0.126 |
| 145. | LP* | ( 6)Ag | 8  | /512. | RY*( 1) O  | 12 | 1.17  | 0.96  | 0.079 |
| 9.   | BD  | ( 1) S | 10 | /137. | LP*( 7)Ag  | 7  | 1.96  | 1.07  | 0.042 |
| 107. | CR  | ( 2) S | 10 | /137. | LP*( 7)Ag  | 7  | 3.66  | 9.41  | 0.170 |
| 111. | CR  | ( 1) O | 11 | /137. | LP*( 7)Ag  | 7  | 2.19  | 19.17 | 0.187 |
| 149. | LP  | ( 1) O | 9  | /137. | LP*( 7)Ag  | 7  | 2.15  | 0.95  | 0.041 |
| 151. | LP  | ( 1) S | 10 | /137. | LP*( 7)Ag  | 7  | 8.27  | 0.75  | 0.071 |
| 152. | LP  | ( 1) O | 11 | /136. | LP*( 6)Ag  | 7  | 6.53  | 0.80  | 0.069 |
| 152. | LP  | ( 1) O | 11 | /137. | LP*( 7)Ag  | 7  | 11.88 | 0.95  | 0.096 |
| 152. | LP  | ( 1) O | 11 | /138. | LP*( 8)Ag  | 7  | 1.91  | 0.92  | 0.038 |
| 153. | LP  | ( 2) O | 11 | /136. | LP*( 6)Ag  | 7  | 8.57  | 0.34  | 0.050 |
| 153. | LP  | ( 2) O | 11 | /137. | LP*( 7)Ag  | 7  | 4.38  | 0.49  | 0.042 |



|                          |                           |       |       |       |
|--------------------------|---------------------------|-------|-------|-------|
| 7. BD ( 1) O 9 - S 10    | /603. BD*( 1) O 9 - S 10  | 1.65  | 0.35  | 0.023 |
| 8. BD ( 2) O 9 - S 10    | /605. BD*( 1) S 10 - O 11 | 1.48  | 1.32  | 0.041 |
| 9. BD ( 1) S 10 - O 11   | /604. BD*( 2) O 9 - S 10  | 1.39  | 1.34  | 0.039 |
| 105. CR ( 1) O 9         | /455. RY*( 3) S 10        | 1.27  | 19.92 | 0.143 |
| 105. CR ( 1) O 9         | /456. RY*( 4) S 10        | 1.02  | 20.63 | 0.130 |
| 110. CR ( 5) S 10        | /603. BD*( 1) O 9 - S 10  | 1.29  | 5.98  | 0.085 |
| 149. LP ( 1) O 9         | /456. RY*( 4) S 10        | 4.30  | 2.45  | 0.092 |
| 150. LP ( 2) O 9         | /453. RY*( 1) S 10        | 20.83 | 1.00  | 0.132 |
| 150. LP ( 2) O 9         | /605. BD*( 1) S 10 - O 11 | 25.54 | 0.65  | 0.117 |
| 152. LP ( 1) O 11        | /455. RY*( 3) S 10        | 1.10  | 1.74  | 0.039 |
| 152. LP ( 1) O 11        | /457. RY*( 5) S 10        | 2.85  | 2.35  | 0.074 |
| 152. LP ( 1) O 11        | /604. BD*( 2) O 9 - S 10  | 2.05  | 1.21  | 0.045 |
| 153. LP ( 2) O 11        | /453. RY*( 1) S 10        | 10.22 | 1.05  | 0.094 |
| 153. LP ( 2) O 11        | /455. RY*( 3) S 10        | 3.50  | 1.28  | 0.061 |
| 153. LP ( 2) O 11        | /604. BD*( 2) O 9 - S 10  | 15.89 | 0.75  | 0.099 |
| 154. LP ( 3) O 11        | /454. RY*( 2) S 10        | 15.12 | 1.04  | 0.122 |
| 154. LP ( 3) O 11        | /459. RY*( 7) S 10        | 3.54  | 0.90  | 0.055 |
| 154. LP ( 3) O 11        | /603. BD*( 1) O 9 - S 10  | 59.16 | 0.26  | 0.113 |
| 603. BD*( 1) O 9 - S 10  | /440. RY*( 14) O 9        | 1.27  | 1.59  | 0.103 |
| 603. BD*( 1) O 9 - S 10  | /454. RY*( 2) S 10        | 8.40  | 0.78  | 0.171 |
| 603. BD*( 1) O 9 - S 10  | /459. RY*( 7) S 10        | 4.26  | 0.63  | 0.119 |
| 605. BD*( 1) S 10 - O 11 | /453. RY*( 1) S 10        | 14.55 | 0.35  | 0.208 |
| 605. BD*( 1) S 10 - O 11 | /455. RY*( 3) S 10        | 10.08 | 0.58  | 0.252 |
| 605. BD*( 1) S 10 - O 11 | /489. RY*( 4) O 11        | 1.08  | 1.27  | 0.138 |
| 605. BD*( 1) S 10 - O 11 | /604. BD*( 2) O 9 - S 10  | 7.58  | 0.04  | 0.053 |
| 10. BD ( 1) O 12 - S 13  | /146. LP*( 7)Ag 8         | 1.94  | 1.07  | 0.042 |
| 112. CR ( 1) O 12        | /146. LP*( 7)Ag 8         | 2.17  | 19.17 | 0.187 |
| 114. CR ( 2) S 13        | /146. LP*( 7)Ag 8         | 3.68  | 9.41  | 0.170 |
| 155. LP ( 1) O 12        | /145. LP*( 6)Ag 8         | 6.59  | 0.80  | 0.069 |
| 155. LP ( 1) O 12        | /146. LP*( 7)Ag 8         | 11.75 | 0.95  | 0.095 |
| 155. LP ( 1) O 12        | /147. LP*( 8)Ag 8         | 1.93  | 0.92  | 0.038 |
| 156. LP ( 2) O 12        | /145. LP*( 6)Ag 8         | 8.69  | 0.34  | 0.050 |
| 156. LP ( 2) O 12        | /146. LP*( 7)Ag 8         | 4.36  | 0.49  | 0.042 |
| 158. LP ( 1) S 13        | /146. LP*( 7)Ag 8         | 8.29  | 0.75  | 0.072 |
| 159. LP ( 1) O 14        | /146. LP*( 7)Ag 8         | 2.18  | 0.95  | 0.041 |
| 10. BD ( 1) O 12 - S 13  | /608. BD*( 2) S 13 - O 14 | 1.39  | 1.34  | 0.039 |
| 11. BD ( 1) S 13 - O 14  | /607. BD*( 1) S 13 - O 14 | 1.65  | 0.35  | 0.023 |
| 12. BD ( 2) S 13 - O 14  | /606. BD*( 1) O 12 - S 13 | 1.48  | 1.32  | 0.041 |
| 117. CR ( 5) S 13        | /607. BD*( 1) S 13 - O 14 | 1.29  | 5.98  | 0.085 |
| 118. CR ( 1) O 14        | /540. RY*( 3) S 13        | 1.27  | 19.92 | 0.143 |
| 118. CR ( 1) O 14        | /541. RY*( 4) S 13        | 1.02  | 20.63 | 0.130 |
| 155. LP ( 1) O 12        | /540. RY*( 3) S 13        | 1.10  | 1.74  | 0.039 |
| 155. LP ( 1) O 12        | /542. RY*( 5) S 13        | 2.85  | 2.35  | 0.074 |
| 155. LP ( 1) O 12        | /608. BD*( 2) S 13 - O 14 | 2.05  | 1.21  | 0.045 |
| 156. LP ( 2) O 12        | /538. RY*( 1) S 13        | 10.22 | 1.05  | 0.094 |
| 156. LP ( 2) O 12        | /540. RY*( 3) S 13        | 3.49  | 1.28  | 0.061 |
| 156. LP ( 2) O 12        | /608. BD*( 2) S 13 - O 14 | 15.88 | 0.75  | 0.099 |
| 157. LP ( 3) O 12        | /539. RY*( 2) S 13        | 15.11 | 1.04  | 0.122 |
| 157. LP ( 3) O 12        | /544. RY*( 7) S 13        | 3.52  | 0.90  | 0.055 |
| 157. LP ( 3) O 12        | /607. BD*( 1) S 13 - O 14 | 59.18 | 0.26  | 0.113 |
| 159. LP ( 1) O 14        | /541. RY*( 4) S 13        | 4.30  | 2.45  | 0.092 |
| 160. LP ( 2) O 14        | /538. RY*( 1) S 13        | 20.81 | 1.00  | 0.132 |
| 160. LP ( 2) O 14        | /606. BD*( 1) O 12 - S 13 | 25.52 | 0.65  | 0.117 |
| 606. BD*( 1) O 12 - S 13 | /515. RY*( 4) O 12        | 1.07  | 1.27  | 0.137 |
| 606. BD*( 1) O 12 - S 13 | /538. RY*( 1) S 13        | 14.52 | 0.35  | 0.208 |
| 606. BD*( 1) O 12 - S 13 | /540. RY*( 3) S 13        | 10.07 | 0.58  | 0.252 |
| 606. BD*( 1) O 12 - S 13 | /608. BD*( 2) S 13 - O 14 | 7.60  | 0.04  | 0.053 |
| 607. BD*( 1) S 13 - O 14 | /539. RY*( 2) S 13        | 8.41  | 0.78  | 0.171 |
| 607. BD*( 1) S 13 - O 14 | /544. RY*( 7) S 13        | 4.25  | 0.63  | 0.119 |
| 607. BD*( 1) S 13 - O 14 | /584. RY*( 14) O 14       | 1.28  | 1.60  | 0.103 |

Wiberg bond index matrix in the NAO basis:

| Atom  | 1      | 2      | 3      | 4      | 5      | 6      | 7      | 8      | 9      |
|-------|--------|--------|--------|--------|--------|--------|--------|--------|--------|
| 1. Se | 0.0000 | 0.0799 | 0.0138 | 0.9972 | 0.9943 | 0.0787 | 0.2310 | 0.0166 | 0.0005 |
| 2. Se | 0.0799 | 0.0000 | 0.9964 | 0.0138 | 1.0177 | 0.0852 | 0.1545 | 0.0233 | 0.0003 |
| 3. Se | 0.0138 | 0.9964 | 0.0000 | 0.0799 | 0.0788 | 0.9932 | 0.0168 | 0.2340 | 0.0001 |
| 4. Se | 0.9972 | 0.0138 | 0.0799 | 0.0000 | 0.0853 | 1.0176 | 0.0233 | 0.1533 | 0.0001 |
| 5. Se | 0.9943 | 1.0177 | 0.0788 | 0.0853 | 0.0000 | 0.0138 | 0.0226 | 0.1612 | 0.0001 |
| 6. Se | 0.0787 | 0.0852 | 0.9932 | 1.0176 | 0.0138 | 0.0000 | 0.1641 | 0.0226 | 0.0004 |
| 7. Ag | 0.2310 | 0.1545 | 0.0168 | 0.0233 | 0.0226 | 0.1641 | 0.0000 | 0.0166 | 0.0339 |
| 8. Ag | 0.0166 | 0.0233 | 0.2340 | 0.1533 | 0.1612 | 0.0226 | 0.0166 | 0.0000 | 0.0001 |
| 9. O  | 0.0005 | 0.0003 | 0.0001 | 0.0001 | 0.0001 | 0.0004 | 0.0339 | 0.0001 | 0.0000 |
| 10. S | 0.0009 | 0.0008 | 0.0002 | 0.0003 | 0.0002 | 0.0011 | 0.0634 | 0.0001 | 1.6487 |
| 11. O | 0.0041 | 0.0020 | 0.0004 | 0.0005 | 0.0005 | 0.0022 | 0.1446 | 0.0003 | 0.2539 |
| 12. O | 0.0004 | 0.0006 | 0.0043 | 0.0019 | 0.0021 | 0.0005 | 0.0003 | 0.1447 | 0.0000 |
| 13. S | 0.0002 | 0.0003 | 0.0010 | 0.0008 | 0.0011 | 0.0002 | 0.0001 | 0.0636 | 0.0000 |
| 14. O | 0.0001 | 0.0001 | 0.0005 | 0.0003 | 0.0004 | 0.0001 | 0.0001 | 0.0341 | 0.0000 |

  

| Atom | 10  | 11  | 12  | 13  | 14  |
|------|-----|-----|-----|-----|-----|
| ---  | --- | --- | --- | --- | --- |

|     |    |        |        |        |        |        |
|-----|----|--------|--------|--------|--------|--------|
| 1.  | Se | 0.0009 | 0.0041 | 0.0004 | 0.0002 | 0.0001 |
| 2.  | Se | 0.0008 | 0.0020 | 0.0006 | 0.0003 | 0.0001 |
| 3.  | Se | 0.0002 | 0.0004 | 0.0043 | 0.0010 | 0.0005 |
| 4.  | Se | 0.0003 | 0.0005 | 0.0019 | 0.0008 | 0.0003 |
| 5.  | Se | 0.0002 | 0.0005 | 0.0021 | 0.0011 | 0.0004 |
| 6.  | Se | 0.0011 | 0.0022 | 0.0005 | 0.0002 | 0.0001 |
| 7.  | Ag | 0.0634 | 0.1446 | 0.0003 | 0.0001 | 0.0001 |
| 8.  | Ag | 0.0001 | 0.0003 | 0.1447 | 0.0636 | 0.0341 |
| 9.  | O  | 1.6487 | 0.2539 | 0.0000 | 0.0000 | 0.0000 |
| 10. | S  | 0.0000 | 1.3557 | 0.0000 | 0.0000 | 0.0000 |
| 11. | O  | 1.3557 | 0.0000 | 0.0000 | 0.0000 | 0.0000 |
| 12. | O  | 0.0000 | 0.0000 | 0.0000 | 1.3560 | 0.2537 |
| 13. | S  | 0.0000 | 0.0000 | 1.3560 | 0.0000 | 1.6478 |
| 14. | O  | 0.0000 | 0.0000 | 0.2537 | 1.6478 | 0.0000 |

Summary of Natural Population Analysis:

| Atom No   | Natural Charge | Natural Population |          |         | Total     |
|-----------|----------------|--------------------|----------|---------|-----------|
|           |                | Core               | Valence  | Rydberg |           |
| 1 se      | 0.04647        | 27.99929           | 5.89205  | 0.06220 | 33.95353  |
| 2 se      | 0.07719        | 27.99929           | 5.86814  | 0.05538 | 33.92281  |
| 3 se      | 0.04549        | 27.99929           | 5.89279  | 0.06243 | 33.95451  |
| 4 se      | 0.07776        | 27.99929           | 5.86771  | 0.05524 | 33.92224  |
| 5 se      | 0.07137        | 27.99929           | 5.87349  | 0.05585 | 33.92863  |
| 6 se      | 0.07041        | 27.99929           | 5.87420  | 0.05610 | 33.92959  |
| 7 ag      | 0.74182        | 7.99900            | 10.23793 | 0.02125 | 18.25818  |
| 8 ag      | 0.74164        | 7.99899            | 10.23822 | 0.02115 | 18.25836  |
| 9 o       | -0.72742       | 1.99985            | 6.68461  | 0.04295 | 8.72742   |
| 10 s      | 1.71003        | 9.99911            | 4.09014  | 0.20071 | 14.28997  |
| 11 o      | -0.91885       | 1.99985            | 6.88306  | 0.03594 | 8.91885   |
| 12 o      | -0.91871       | 1.99985            | 6.88291  | 0.03596 | 8.91871   |
| 13 s      | 1.71012        | 9.99911            | 4.09011  | 0.20066 | 14.28988  |
| 14 o      | -0.72732       | 1.99985            | 6.68451  | 0.04296 | 8.72732   |
| * Total * | 2.00000        | 211.99136          | 91.05987 | 0.94878 | 304.00000 |

For all atoms:

|                       |            |          |    |      |
|-----------------------|------------|----------|----|------|
| Core                  | 211.99136( | 99.9959% | of | 212) |
| Valence               | 91.05987(  | 98.9781% | of | 92)  |
| Natural Minimal Basis | 303.05122( | 99.6879% | of | 304) |
| Natural Rydberg Basis | 0.94878(   | 0.3121%  | of | 304) |

\*\*\*\*\*  
 \*  
 \* atomic charges with multicenter corrections \*  
 \*  
 \*\*\*\*\*

| atom | charge  |
|------|---------|
| 1 se | 0.2028  |
| 2 se | 0.1157  |
| 3 se | 0.2061  |
| 4 se | 0.1145  |
| 5 se | 0.1189  |
| 6 se | 0.1210  |
| 7 ag | 0.4318  |
| 8 ag | 0.4315  |
| 9 o  | -0.4364 |
| 10 s | 1.1883  |
| 11 o | -0.6236 |
| 12 o | -0.6228 |
| 13 s | 1.1882  |
| 14 o | -0.4361 |

### S4.4 Selenium, Silver and Oxygen distances and angles :Calculated structures on different levels.

|                      | Se6_bp_svp (d3d)  | Se6_pbe0_tzvpp (d3d)  | Se6_mp2_tzvpp (d3d) | Ag2Se6_1 (BP/SV(P)) A | Ag2Se6_1 (PBE0/TZVPP) A   | Ag2Se6_1 ((ri)MP2/tzvpp) A |                         |
|----------------------|-------------------|-----------------------|---------------------|-----------------------|---------------------------|----------------------------|-------------------------|
| Se-Se(Å)             | 2.381             | 2.336                 | 2.32                | 2.408                 | 2.356                     | 2.342                      |                         |
| (in the Se6 ring)    |                   |                       |                     |                       |                           |                            |                         |
| Se-Se(ave., Å)       | 2.381             | 2.336                 | 2.32                | 2.408                 | 2.356                     | 2.342                      |                         |
| Se-Se-Se(o)          | 101.74            | 101.42                | 100.86              |                       |                           |                            |                         |
|                      |                   |                       |                     |                       |                           |                            |                         |
| Se-Se-Se(ave., o)    | 101.74            | 101.42                | 100.86              | 101.66                | 101.54                    | 101.14                     |                         |
| Se-Se-Se-Se(ave., o) | 75.2              | 75.71                 | 76.58               | 75.33                 | 75.52                     | 76.15                      |                         |
| d(Ag1-Se) [Å]        |                   |                       |                     | 2.933                 | 2.903                     | 2.840                      |                         |
|                      |                   |                       |                     |                       |                           |                            |                         |
| d(Ag2-Se) [Å]        |                   |                       |                     |                       |                           |                            |                         |
| d(Ag1-O) [Å]         |                   |                       |                     |                       |                           |                            |                         |
|                      |                   |                       |                     |                       |                           |                            |                         |
|                      | Ag2Se6_2 bp-svp B | Ag2Se6_2 pbe0/tzvpp B | Ag3Se6_2 bp/svp C   | Ag3Se6_2 pbe0/tzvpp C | Ag2Se6(SO2)2 pbe0/tzvpp D | Ag2Se6(SO2)2 mp2/tzvpp D   | Ag2Se6(SO2)4 pbe0/tzvpp |
| Se-Se(Å)             | 2.354 (2x)        | 2.325 (2x)            | 2.355 (2x)          | 2.326 (2x)            | 2.343 (2x)                | 2.334 (2x)                 | 2.333 (2x)              |
| (in the Se6 ring)    | 2.408 (2x)        | 2.353 (2x)            | 2.409 (2x)          | 2.354 (2x)            | 2.353 (2x)                | 2.337 (2x)                 | 2.348 (2x)              |
|                      | 2.477 (2x)        | 2.393 (2x)            | 2.475 (2x)          | 2.392 (2x)            | 2.354 (2x)                | 2.339 (2x)                 | 2.358 (2x)              |
| Se-Se(ave., Å)       | 2.413             | 2.357                 | 2.413               | 2.357                 | 2.350                     | 2.337                      | 2.347                   |
| Se-Se-Se(o)          | 98.318            | 99.443 (x2)           | 97.69               | 102.91                | 100.89                    | 100.85                     | 100.56                  |
|                      | 100.188           | 99.617 (x2)           | 100.41              | 99.16                 | 100.63                    | 100.82                     | 101.49                  |
|                      | 101.202           | 100.668 (x2)          | 101.26              | 100.73                | 101.79                    | 100.71                     | 100.89                  |
| Se-Se-Se(ave., o)    | 99.90             | 99.91                 | 99.78               | 100.93                | 101.10                    | 100.79                     | 100.98                  |
| Se-Se-Se-Se(ave., o) | 76.23             | 76.10                 | 76.04               | 76.01                 | 76.07                     | 76.67                      | 76.40                   |
| d(Ag1-Se) [Å]        | 2.812             | 2.756                 | 2.793 (2x)          | 2.744 (2x)            | 2.782 (2x)                | 2.769 (2x)                 | 2.737 (2x)              |
|                      | 2.940 (2x)        | 2.929 (2x)            | 2.953 (4x)          | 2.946 (4x)            | 3.009 (2x)                | 2.867 (2x)                 | 3.046 (2x)              |
|                      |                   |                       |                     |                       | 3.045 (2x)                | 2.918 (2x)                 | 3.295 (2x)              |
| d(Ag2-Se) [Å]        | 2.568             | 2.575                 | 2.590 (2x)          | 2.581                 |                           |                            |                         |
| d(Ag1-O) [Å]         |                   |                       |                     |                       | 2.258 (2x)                | 2.224 (2x)                 | 2.358 (2x)              |
|                      |                   |                       |                     |                       |                           |                            | 2.489 (2x)              |

### S4.5 Se<sub>6</sub><sup>2+</sup> conformers

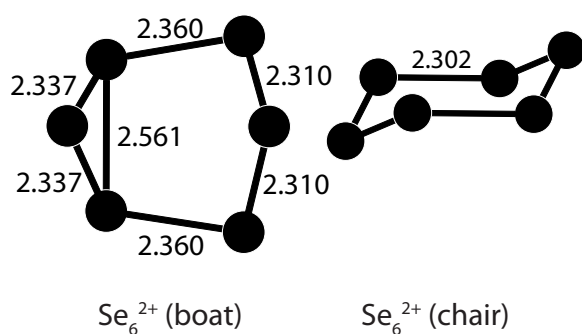

### S5.1 NMR experimental details 1

**Solution NMR** <sup>19</sup>F-NMR (<sup>77</sup>Se-NMR) [<sup>121</sup>Sb-NMR] spectra were obtained using a 10 mm broad-band probe operating at 376.284 (76.391) [95.717] MHz, <sup>1</sup>H- and <sup>13</sup>C-NMR spectra at 399.947 and 100.578 MHz respectively. <sup>19</sup>F-NMR (<sup>1</sup>H-NMR) spectra were recorded over a shift range of + -240 to +25 ppm (0 to +12 ppm), line-broadening was not applied, typically 32 to 64 transients were accumulated with an acquisition time of 0.60 (3.737) s and a pulse width of 5 (22.3) μs. For each <sup>77</sup>Se-NMR sample two spectra were recorded over a shift range of -50 to + 1250 and +1000 to +2100 ppm, line-broadening parameters, used in the exponential multiplication of the free induction decays, were 0 to 40 Hz, further acquisition parameters were as follows: acquisition time, 0.20 s; measuring time in all cases 20 to 60 min or 4000 to 10000 transients. <sup>121</sup>Sb-NMR (<sup>13</sup>C-NMR) spectra were recorded over a shift range of -500 to + 500 ppm (0 to +240 ppm), about 1000 to 3000 (40000 to 60000) transients were acquired for each sample with an acquisition time of 0.20 (1.199) s and a pulse width of 20 (12) μs; line-broadening parameters were 0 to 20 (0) Hz. All NMR-samples were run unlocked, chemical shifts with a positive sign are correlated with shifts to high frequencies (downfield) of the reference compound.

### S5.2 Additional Solid State NMR spectra of (AgI<sub>2</sub>)<sub>n</sub> nSbF<sub>6</sub>

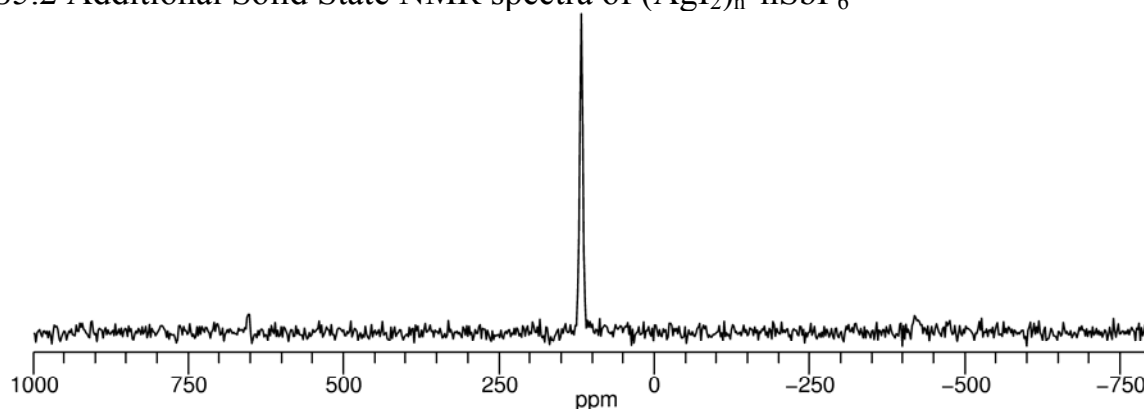

**Figure 5.2.1:** <sup>109</sup>Ag{<sup>19</sup>F} MAS NMR of (AgI<sub>2</sub>)<sub>n</sub> nSbF<sub>6</sub> obtained with PRESTO-III.

The solid-state  $^{19}\text{F}$  NMR spectra are sensitive to the dynamics of  $\text{SbF}_6^-$  and  $\text{AsF}_6^-$  anions on the NMR time scale. In liquid-state  $^{19}\text{F}$  NMR multiplets caused by J-couplings between  $^{19}\text{F}$  and  $^{75}\text{As}$  ( $I = 3/2$ , 100%),  $^{121}\text{Sb}$  ( $5/2$ , 57%) or  $^{123}\text{Sb}$  ( $7/2$ , 43%) are well known.<sup>42</sup> In the solid state NMR, usually only broad lines are observed owing to anisotropic  $^{19}\text{F}$  NMR interactions like the magnetic dipole-dipole coupling and the anisotropic chemical shift and the isotropic chemical shift dispersion.<sup>43, 44</sup> The well resolved multiplets in Figure 18 give evidence of fast rotational motion, fast enough to cancel out homonuclear dipolar interactions between  $^{19}\text{F}$  nuclei. This is evident by comparing experimental spectra with simulated spectra (not shown) taking into account all direct dipolar interactions within a  $\text{XF}_6$  ( $X = \text{As, Sb}$ ) octahedron. We conclude that the rotational motion of  $\text{XF}_6$  anions is thermally activated for all samples investigated in this study. Isotropic chemical shift values agree well with those reported in liquid-state NMR. Note that fast and free rotational motion implies that only a single  $^{19}\text{F}$  resonance per octahedron is expected. Clearly the two quartets in the  $^{19}\text{F}$  NMR spectrum of  $\text{AgAsF}_6$  give evidence of two crystallographically inequivalent  $\text{AsF}_6$  units, which does not agree with the reported description.<sup>45</sup>

Similar observations were made for the solid state  $^{19}\text{F}$ -environments in the related salts  $\text{Ag}(\text{C}_2\text{H}_4)_3^+[\text{A}]^-$   $\text{Ag}(\text{P}_4\text{S}_3)_3^+[\text{A}]^-$  with only one sharp  $^{19}\text{F}$  MAS-NMR resonance for each anion due to dynamics.<sup>46, 47</sup> Temperature dependent NMR combined with single-crystal X-ray diffraction should be able to lift this contradiction but go beyond the scope of this contribution.

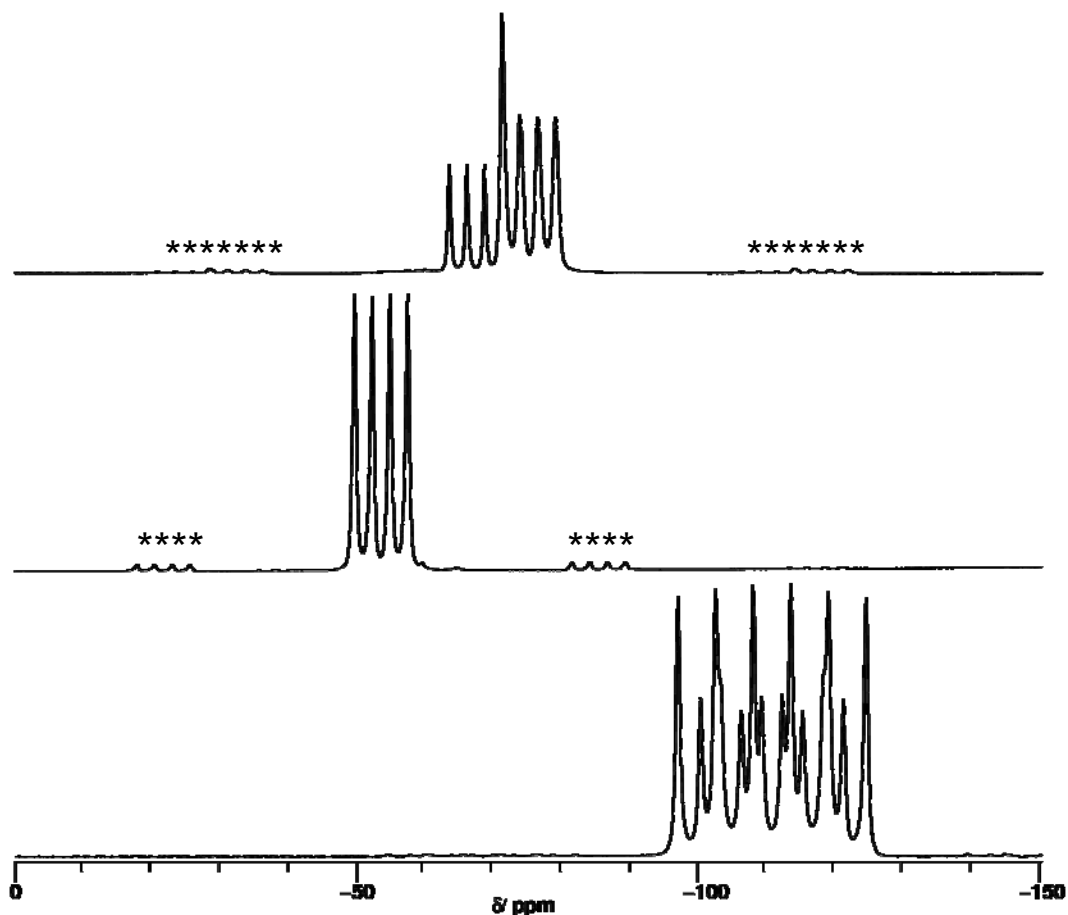

**Figure 5.2.2:**  $^{19}\text{F}$  MAS NMR spectra of  $(\text{AgI}_2)_n\text{nSbF}_6$  (bottom),  $(\text{AgI}_2)_n\text{nAsF}_6$  (middle) and  $\text{AgAsF}_6$  (top) at 16, 12 and 16 kHz rotor spinning frequency, respectively; peaks marked by asterisks are rotational sidebands.

## S6 Syntheses of $\text{Ag}[\text{Sb}(\text{OTeF}_5)_6]$

a) With  $\text{CH}_2\text{Cl}_2$  solvent  $\text{Ag}[\text{Sb}(\text{OTeF}_5)_6]$  was initially synthesized according to the literature procedure. However, due to the extreme sensitivity of this compound, the glass vessels were flame dried with  $\text{SF}_4$  for at least one hour and flame dry the vessels after the  $\text{SF}_4$  treatment. Freshly prepared  $\text{AgOTeF}_5$  (13.14 g, 37.94 mmol) was weighed into a two bulb-frit plate vessel and exposed over night to a dynamic vacuum to remove all traces of  $\text{CH}_2\text{Cl}_2$ . A stock solution of  $\text{SbCl}_5$  in F-114 (5.57 ml, 1.326 M, 7.39 mmol) was transferred By a direct connection into the second bulb and approximately 10 ml of F-114 added. This F-114- $\text{SbCl}_5$  solution was then poured onto the solid  $\text{AgOTeF}_5$  A reaction immediately started with warming to about  $40^\circ\text{C}$  with a change in the appearance of the precipitate. About 10 ml of

CH<sub>2</sub>Cl<sub>2</sub> were added after stirring the suspension over night and a brownish clear solution was given on filtration. The insoluble material was washed six times when all volatiles were removed in vacuo and the remaining solid beige residue was exposed to a dynamic vacuum overnight. The flask was cut open and the soluble material grounded for 5 minutes and transferred into a one bulb vessel (10.60 g vs. 10.50 g expected) and exposed to a dynamic vacuum for 96 hours, during which there was a weight loss of 0.638 g. A NMR-sample of this previously all soluble material (0.30 g) was prepared in SO<sub>2</sub> (approx. 4 g) and revealed the presence of some insoluble beige material. The solution <sup>19</sup>F-NMR spectrum showed only lines attributable to the Sb(OTeF<sub>5</sub>)<sub>6</sub><sup>-</sup> anion, however, in the <sup>1</sup>H-NMR spectrum one line at <sup>1</sup>H = 5.12 ppm was observed (= CH<sub>2</sub>Cl<sub>2</sub>). An IR-spectrum of this material did not show the presence of CH<sub>2</sub>Cl<sub>2</sub>. The solid material (9.299 g) was then exposed for another 130 hours to a dynamic vacuum during which a constant weight loss of 4.6 mg/hour was observed. The grease of the trap of the vacuum line turned black during this time suggesting the evolution of a reactive volatile species. The remaining 8.701 g of beige solid were dissolved in 12.46 g of SO<sub>2</sub> and filtered into a second bulb leaving 0.694 g of a solid, insoluble beige residue. This insoluble material did not dissolve in CH<sub>2</sub>Cl<sub>2</sub> with ultrasonic enhancement (NMR) and its FT-Raman spectrum showed the presence of small amounts of SbCl<sub>6</sub><sup>-</sup> {possibly from SbCl<sub>5</sub> + AgCl → Ag[SbCl<sub>6</sub>], RA(cm<sup>-1</sup>): 330(v1, 100), 281(v2, 22), 196(v5, 31) cm<sup>-1</sup>(int%) assignments from[33] and a teflate containing substance { possibly Ag[(O)Sb(OTeF<sub>5</sub>)<sub>4</sub>], RA(cm<sup>-1</sup>): 716(18), 703(16), 666(100), 448(10), 411(5), 395(88), 308(11), 241(14), 164(21), 142(26), 122(19), 105(sh) cm<sup>-1</sup>(int%)}. A MS only showed fragments attributable to SbCl<sub>5</sub>(from Ag[SbCl<sub>6</sub>]). The soluble material was exposed 6 hours to a dynamic vacuum until a (small) constant weight-loss was achieved. The nature of this soluble material was monitored by <sup>19</sup>F- and <sup>121</sup>Sb-NMR spectroscopy (SO<sub>2</sub> solution) showing the exclusive presence of lines attributable to the Sb(OTeF<sub>5</sub>)<sub>6</sub><sup>-</sup> anion [ $\delta^{19}\text{F} = -40.6$  ppm,  $^1\text{J}(^{19}\text{F}, ^{125}\text{Te}) = 3563$  Hz;  $\delta^{121}\text{Sb} = -12.6$  ppm;  $^2\text{J}(^{121}\text{Sb}, ^{125}\text{Te}) = 763$  Hz], however in the <sup>1</sup>H - NMR still one line attributable to CH<sub>2</sub>Cl<sub>2</sub> was observed at  $\delta^1\text{H} = 5.12$  ppm.

b) With SO<sub>2</sub> solvent A stock solution of SbCl<sub>5</sub> in F-114 (5.75 ml, 1.326 M, 7.62 mmol) was transferred by a direct connection into one bulb of a two bulb frit plate vessel and additional 42.61 g F-114 were condensed onto it. This solution was poured onto the solid AgOTeF<sub>5</sub> (13.56 g, 39.15 mmol) in a second bulb and vigorously shaken for about 15 min after which the solution was left stirring over night. Addition of 6.76 g of SO<sub>2</sub> led to a slimy, paint like mixture. Filtration resulted in two separate liquid phases: a brownish SO<sub>2</sub> and colourless F-114 phase. The insolubles were extracted 6 times after which all solubles had been transferred into the second bulb. All volatiles were removed in vacuo and the resulting solid was exposed for 24 hours to a dynamic vacuum after which 0.78 g of a volatile material was lost (compared to the initial weight). 5.83 g SO<sub>2</sub> were condensed onto the solubles and filtered into a separate bulb (15.55 g solution transferred) leaving 5.70 g of a insoluble material [calc. AgCl: 4.64 g) and extracting 9.72 g soluble material (Ag[Sb(OTeF<sub>5</sub>)<sub>6</sub>], yield: 90 %). An <sup>19</sup>F-NMR

spectrum of the soluble material in SO<sub>2</sub> / SO<sub>2</sub>ClF mixture (4 g, 1:3 by weights) confirms the exclusive presence of lines attributable to the Sb(OTeF<sub>5</sub>)<sub>6</sub><sup>-</sup> anion but the <sup>1</sup>H - NMR spectrum still showed the presence of one line at δ <sup>1</sup>H = 4.66 ppm.

### S7 Attempted syntheses of [Se<sub>x</sub>][Sb(OTeF<sub>5</sub>)<sub>6</sub>](x = 6, 8)

Grey selenium (99.0 %, 0.131 g, 1.653 mmol) and 0.961 g Ag[Sb(OTeF<sub>5</sub>)<sub>6</sub>] (0.579 mmol) were weighed into a 10 mm (o.d.) thick walled NMR tube, 4 g of SO<sub>2</sub> (5.5 cm height) was added and sonicated one hour at ambient temperature giving a greenish yellowish solution. NMR spectra at 0 °C, -30 and -70 °C showed two resonances at δ <sup>77</sup>Se = 1100±7 and 766±5 ppm [Se<sub>10</sub><sup>2+</sup>] as well as those attributable to the Se<sub>8</sub><sup>2+</sup> dication in about 10% of the total intensity (only at -70 °C, δ <sup>77</sup>Se = 1058, 1077, 1205, 1533, 1978 ppm). A preparation using an excess of Se [0.190 g Se (2.409 mmol) and 0.525 g Ag[Sb(OTeF<sub>5</sub>)<sub>6</sub>] (0.316 mmol) in approx. 4 g of SO<sub>2</sub>] gave a similar product (<sup>77</sup>Se-NMR) and unreacted selenium. In another preparation, a stock solution of Ag[Sb(OTeF<sub>5</sub>)<sub>6</sub>] in SO<sub>2</sub> (1.6 ml, 0.395 M, 0.632 mmol) was poured onto grey selenium (0.174 g, 2.204 mmol) in a 10 mm NMR tube through a suitable adapter.[A graded cylinder fitted with a J. Young valve and a direct connection (7 mm diameter) suitable to attach a 10 mm NMR tube. The connection includes a Rotoflo valve with a ¼" which is used to flame dry the evacuated direct connection prior to use. To ensure complete transfer of the stock solution, small amounts of the solvent were condensed three times into the cylinder and poured back to the reaction vessel.] About 3-4 g of SO<sub>2</sub> were added to reach the optimum height for NMR measurements (5.5 cm). This mixture was exposed to ultrasonic for one hour at ambient temperature giving a clear, intensely yellow-orange solution over a small amount of black precipitate. NMR spectra at -30 °C showed the presence of similar resonances at δ <sup>77</sup>Se = 774 and 1071 ppm (as well as unassigned lines at δ <sup>77</sup>Se = 879 and 994 ppm). The yellow solution was decanted into a two bulb vessel fitted by a J. Young NMR valve by the direct connection of the NMR-tube and the vessel. 0.061 g of a blackish material [99% Se, FT-Raman] remained in the tube (together with a little yellow solid on the glass walls). Yellow-orange crystals were obtained from the yellow orange SO<sub>2</sub> solution by the application of a temperature gradient (ΔT = 10 - 20 °C) at an outside temperature of 5 °C.[One bulb of the vessel was placed in a small Dewar vessel which was filled by about 20% with liquid N<sub>2</sub> so that the bottom of the bulb and the surface of the liquid N<sub>2</sub> were separated by approximately 3 to 4 cm.] On removal of the dewar, the block like crystals dissolved very readily, presumably in small amounts of SO<sub>2</sub>. Therefore all volatiles were removed in vacuo (1.5 h), while the crystals were cooled to ca. -20 to -30 °C, giving 1.19 g {0.361 mmol, 96 % based on Ag[Sb(OTeF<sub>5</sub>)<sub>6</sub>]} crystalline material (slightly sticky). 0.5004 g (0.1296 mmol) of the yellow material were loaded in a 10 mm (o.d.) NMR tube and 3.9761 g of SO<sub>2</sub> condensed onto the sample giving a yellow solution. 0.5218 g (12.7104 mmol) of CH<sub>3</sub>CN were then condensed onto the frozen (77 K) solution. Upon warming a red precipitate over a



clear, colourless solution was immediately formed. The acetonitrile methyl groups show only one signal in the proton NMR spectrum (r.t. and  $-70\text{ }^{\circ}\text{C}$ ). The red material darkened considerably over several weeks and was separated from the clear solution by filtration into a specially designed apparatus. After carefully washing the insoluble material about six times with  $\text{SO}_2$ , all volatiles were removed in vacuo and the solid material was shown to be elemental selenium (FT-Raman).

S8 Powder Spectra of the greyish remains in the synthesis of **2** which are confirmed to be grey selenium.

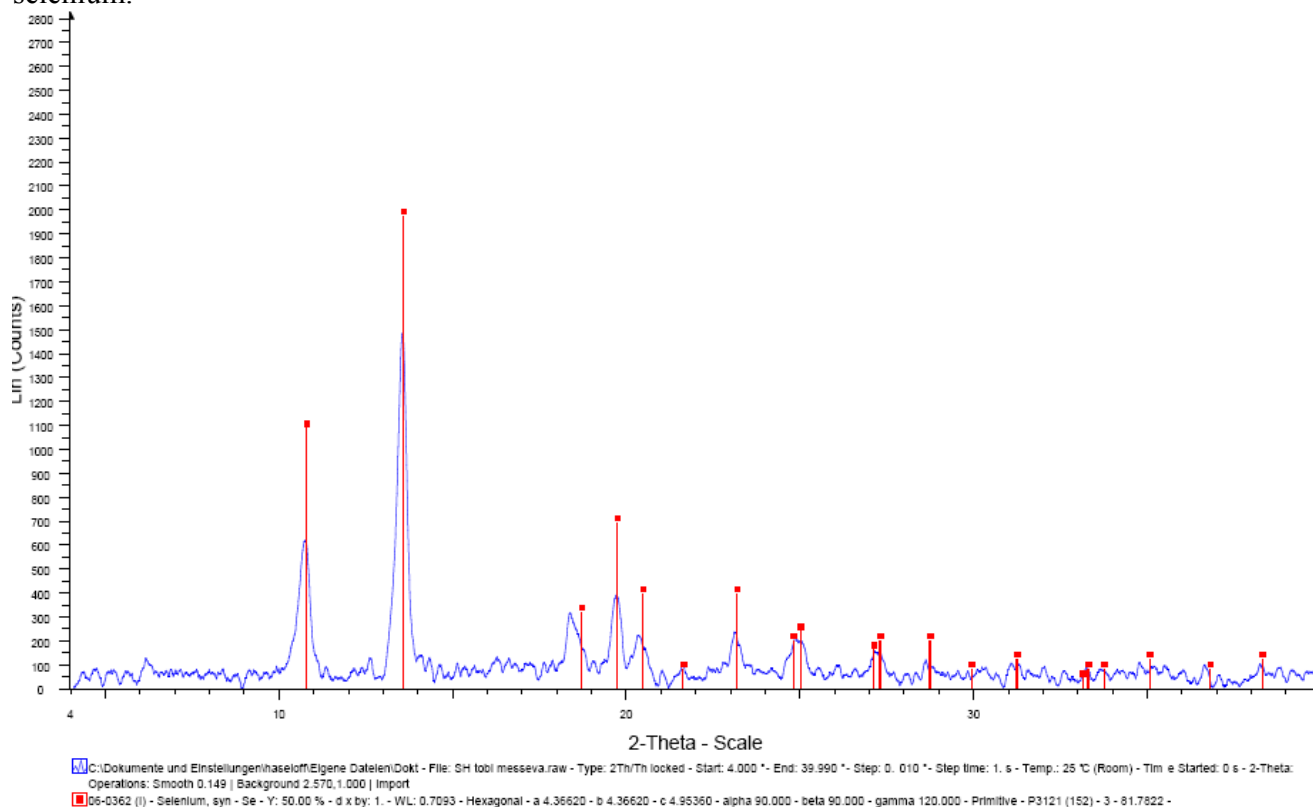

S9  $^{77}\text{Se}$ -spectra of **2** after 27000 scans (5s delay, 0.85s acquisition time) in  $\text{SO}_2$  solution in J. Young 5 mm NMR tube.

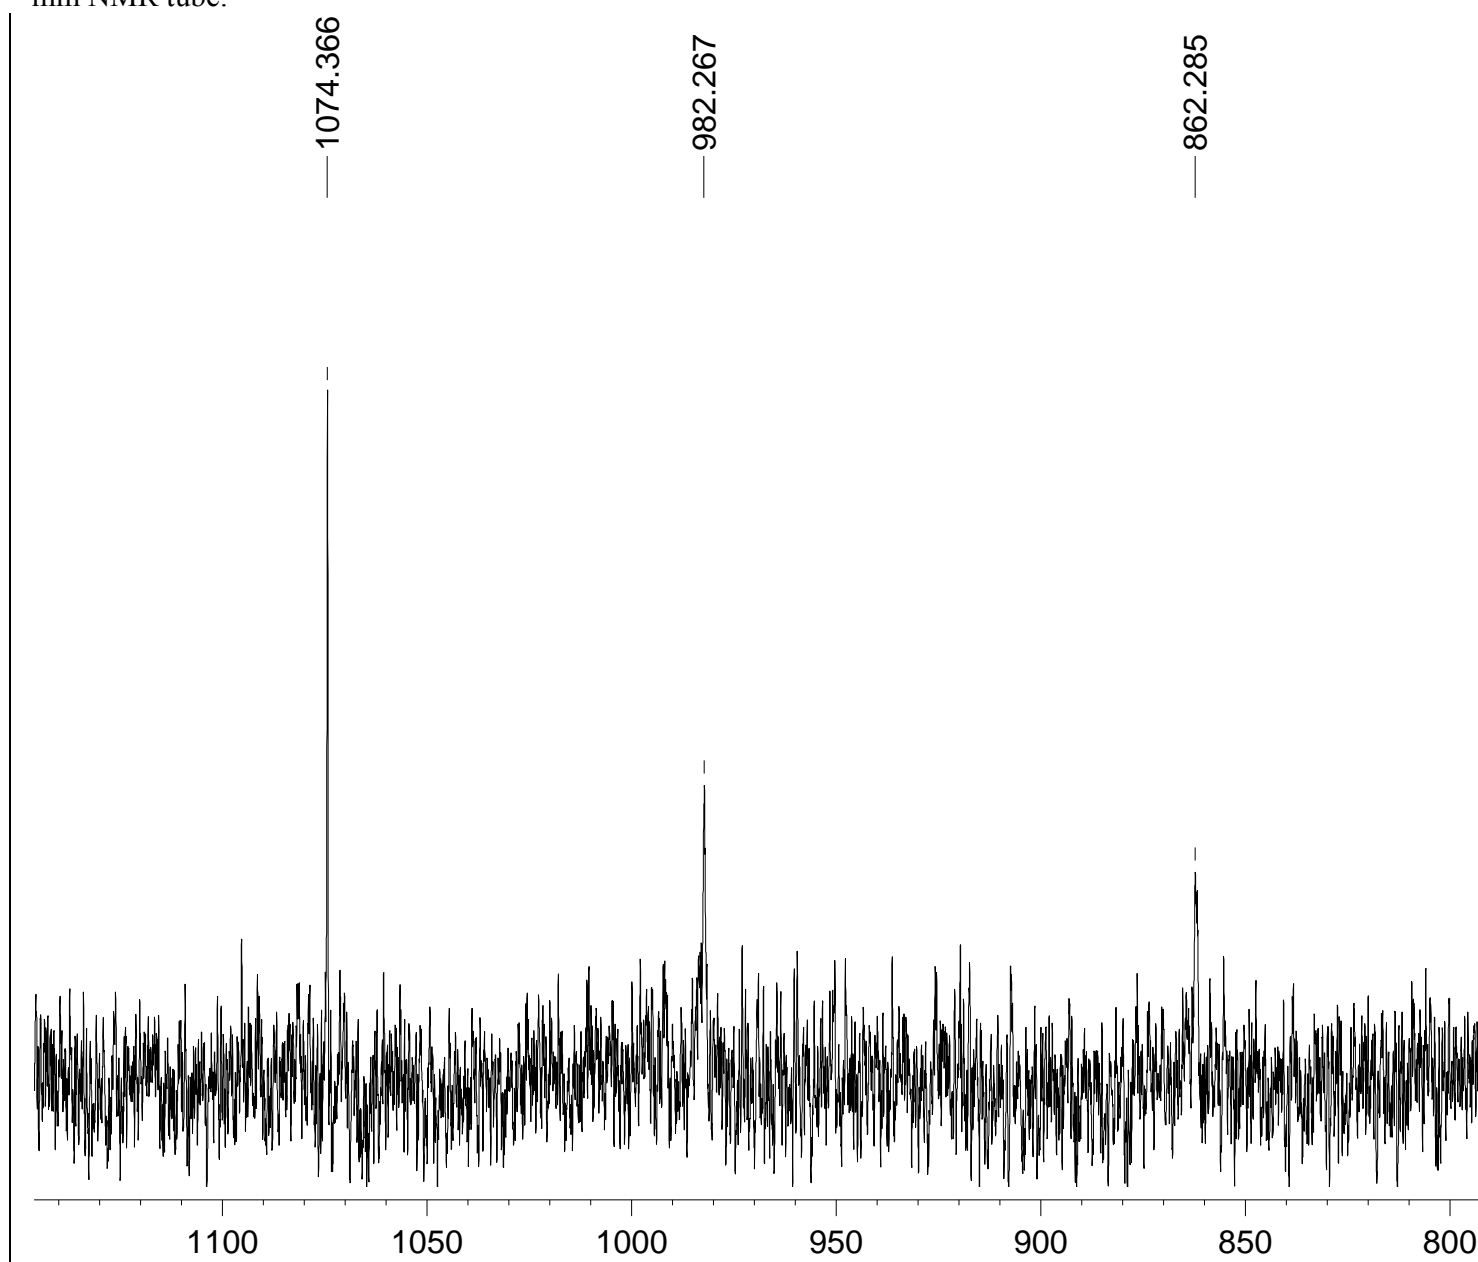

### S10 Power XRD r.t. (Cu).

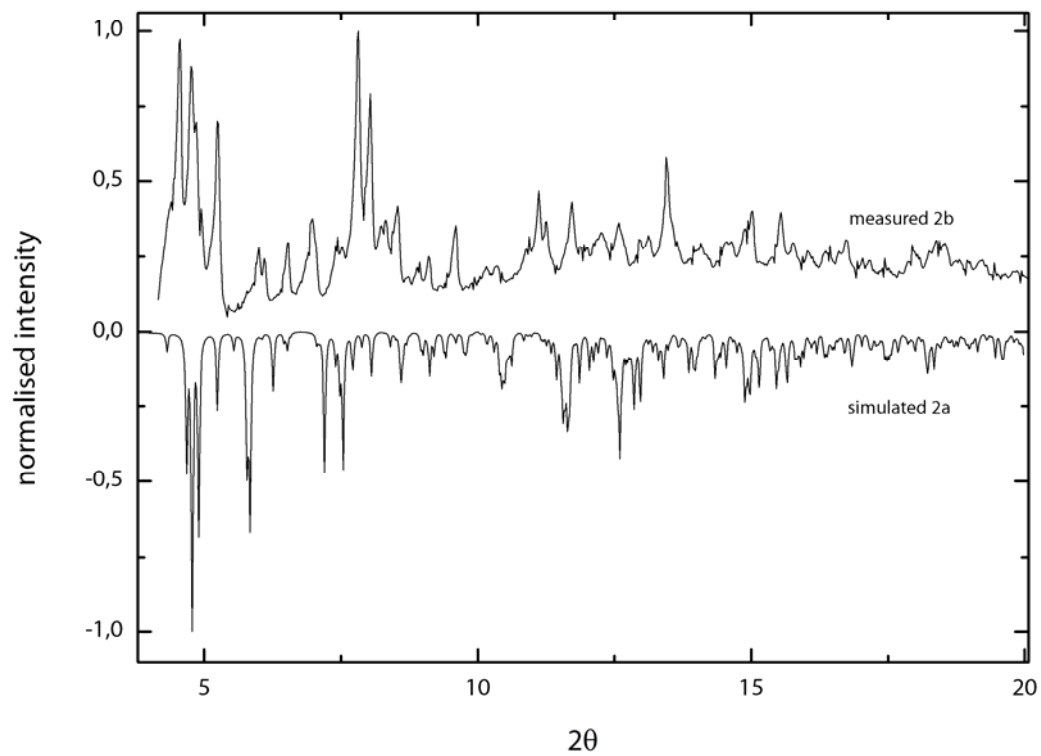

## References

1. B. Kesanli, J. Fettinger and B. Eichhorn, *Angew. Chem., Int. Ed.*, 2001, **40**, 2300-2302.
2. R. Minkwitz, H. Borrmann and J. Nowicki, *Z. Naturforsch., B: Chem. Sci.*, 1991, **46**, 629-634.
3. P. Bakshi, P. D. Boyle, T. S. Cameron, J. Passmore, G. Schatte and G. W. Sutherland, *Inorg. Chem.*, 1994, **33**, 3849-3851.
4. S. Brownridge, T. S. Cameron, J. Passmore, G. Schatte and T. C. Way, *J. Chem. Soc., Dalton Trans.*, 1996, 2553-2570.
5. A. Decken, C. Knapp, G. B. Nikiforov, J. Passmore, J. M. Rautiainen, X. Wang and X. Zeng, *Chem. Eur. J.*, 2009, **15**, 6504-6517.
6. D. M. Van Seggen, P. K. Hurlburt, O. P. Anderson and S. H. Strauss, *J. Am. Chem. Soc.*, 1992, **114**, 10995-10997.
7. R. E. Bachman and D. F. Andretta, *Inorg. Chem.*, 1998, **37**, 5657-5663.
8. A. F. Wells, *Structural Inorganic Chemistry*, 5 edn., Clarendon Press, Oxford, 1984.
9. B.-K. Teo and J. C. Calabrese, *J. Am. Chem. Soc.*, 1975, **97**, 1256-1257.
10. H. P. A. Mercier, J. C. P. Sanders and G. J. Schrobilgen, *J. Am. Chem. Soc.*, 1994, **116**, 2921-2937.
11. C. Knapp and C. Schulz, *Chem. Comm.*, 2009, 4991-4993.
12. C. H. Holder and M. Fink, *J. Chem. Phys.*, 1981, **75**, 5323-5325.
13. I. D. Brown, *The Chemical Bond in Inorganic Chemistry (The Bond Valence Model)*, Oxford University Press, Oxford, 2002.
14. I. Krossing, *Chem. Eur. J.*, 2001, **7**, 490-502.
15. Some residual electron density can be found close to the Se<sub>6</sub>-ring (density max 2.261/ min. - 1.355). It is possible to refine an alternative Se<sub>8</sub>-complex with a occupation of less than 5% in the cation, but there are invariances in the angles and distances compared to Se<sub>8</sub> (see supplemental). The influence on the all overall quality of the refinement is small e.g. (R1 = 0.1038, wR2 = 0.2654), but more NPDs occur in the anion, leading to an unacceptable data /parameter ratio. Therefore we decided to omit this Se<sub>8</sub>-fragment in the final refinement.
16. M. Gonsior, I. Krossing, L. Müller, I. Raabe, M. Jansen and L. Van Wüllen, *Chem. Eur. J.*, 2002, **8**, 4475-4492.
17. Y. Miyamoto, *Jpn. J. Appl. Phys.*, 1980, **19**, 1813-1819.
18. M. Wachhold and M. G. Kanatzidis, *J. Am. Chem. Soc.*, 1999, **121**, 4189-4195.
19. W. S. Sheldrick and M. Wachhold, *Chem. Commun.*, 1996, 607-608.
20. B. W. Eichhorn, S. P. Mattamana, D. R. Gardner and J. C. Fettinger, *J. Am. Chem. Soc.*, 1998, **120**, 9708-9709.
21. H. G. von Schnering, J. Wolf, D. Weber, R. Ramirez and T. Meyer, *Angew. Chem.*, 1986, **98**, 372-373.
22. G. A. Marking and M. G. Kanatzidis, *Chem. Mater.*, 1995, **7**, 1915-1921.
23. Y.-B. Dong, X. Zhao, B. Tang, H.-Y. Wang, R.-Q. Huang, M. D. Smith and H.-C. zur Loye, *Chem. Commun.*, 2004, 220-221.
24. A. Lavalette, G. A. Lawrance, N. W. Alcock and M. J. Hannon, *Eur. J. Inorg. Chem.*, 2004, 3981-3983.
25. B. Neumueller, F. Weller, F. Schmock and K. Dehnicke, *Z. Anorg. Allg. Chem.*, 2005, **631**, 1767-1772.
26. M. M. Olmstead, K. Maitra and A. L. Balch, *Angew. Chem., Int. Ed.*, 1999, **38**, 231-233.
27. E. V. Anokhina, C. S. Day, M. W. Essig and A. Lachgar, *Angew. Chem., Int. Ed.*, 2000, **39**, 1047-1049.
28. G. B. Gardner, D. Venkataraman, J. S. Moore and S. Lee, *Nature*, 1995, **374**, 792-795.
29. Q.-M. Wang and T. C. W. Mak, *J. Am. Chem. Soc.*, 2000, **122**, 7608-7609.
30. K. Neining, H. W. Rotter and G. Thiele, *Z. Anorg. Allg. Chem.*, 1996, **622**, 1814-1818.
31. A. Bacchi, W. Baratta, F. Calderazzo, F. Marchetti and G. Pelizzi, *Inorg. Chem.*, 2002, **41**, 3894-3900.

32. A. Bacchi, W. Baratta, F. Calderazzo, F. Marchetti and G. Pelizzi, *Angew. Chem.*, 1994, **106**, 206-207 (See also *Angew Chem, Int Ed Engl*, 1994, 1933(1992), 1193-1995).
33. F. A. Cotton, E. V. Dikarev and M. A. Petrukhina, *Angew. Chem., Int. Ed.*, 2001, **40**, 1521-1523.
34. H. M. Haendler and P. M. Carkner, *J. Solid State Chem.*, 1979, **29**, 35-39.
35. W. A. S. Nandana, J. Passmore and P. S. White, *J. Chem. Soc., Chem. Commun.*, 1983, 526-528.
36. W. A. S. Nandana, J. Passmore, P. S. White and C. M. Wong, *Inorg. Chem.*, 1989, **28**, 3320-3328.
37. R. Faggiani, R. J. Gillespie and J. W. Kolis, *J. Chem. Soc., Chem. Commun.*, 1987, 592-593.
38. T. S. Cameron, I. Krossing and J. Passmore, *Inorg. Chem.*, 2001, **40**, 4488-4490.
39. R. D. Shannon, *Acta Crystallogr., Sect. A*, 1976, **A32**, 751-767.
40. H. D. B. Jenkins, J. Passmore and L. Glasser, *Inorg. Chem.*, 1999, **38**, 3609-3620.
41. U. P. R. M. Preiss, J. M. Slattery and I. Krossing, *Ind. Eng. Chem. Res.*, 2009, **48**, 2290-2296.
42. S. Berger, S. Braun and H.-O. Kalinowski, *NMR-Spektroskopie von Nichtmetallen 19F-NMR-Spektroskopie*, Georg Thieme Verlag, Stuttgart, 1994.
43. A. M. Panich, H. M. Vieth, P. K. Ummat and W. R. Datars, *Physica B Condensed Matter*, 2003, **327**, 102-107.
44. B. E. Scruggs and K. K. Gleason, *Macromolecules*, 1992, **25**, 1864-1869.
45. R. Hagiwara, K. Kitashita, Y. Ito and O. Tamada, *Solid State Sci.*, 2000, **2**, 237-241.
46. I. Raabe, S. Antonijevic and I. Krossing, *Chem. Eur. J.*, 2007, **13**, 7510-7522.
47. A. Reisinger, N. Trapp, C. Knapp, D. Himmel, F. Breher, H. Rügger and I. Krossing, *Chem. Eur. J.*, 2009, **15**, 9505-9520, S9505/9501-S9505/9569.
